# Supplementary material for: Synthesis and Late-Stage Modification of (−)-Doliculide Derivatives Using Matteson’s Homologation Approach
Source: MDPI journal article supplement (doi:10.3390/md22040165), 2024-04-08

# Synthesis and Late-Stage Modification of (-)-Doliculide Derivatives Using Matteson's Homologation approach

Markus Tost <sup>1</sup> and Uli Kazmaier <sup>1,\*</sup>

Organic Chemistry, Saarland University, Campus Building C4.2, D-66123 Saarbruecken, Germany;

\* Correspondence: u.kazmaier@mx.uni-saarland.de; Tel.: +49-681-302-3409

## Copies of the NMR spectra

|                                                                |     |
|----------------------------------------------------------------|-----|
| <sup>1</sup> H/ <sup>13</sup> C-NMR Compound <b>2a</b> .....   | S2  |
| <sup>1</sup> H/ <sup>13</sup> C-NMR Compound <b>2b</b> .....   | S3  |
| <sup>1</sup> H/ <sup>13</sup> C-NMR Compound <b>3a</b> .....   | S4  |
| <sup>1</sup> H/ <sup>13</sup> C-NMR Compound <b>3b</b> .....   | S5  |
| <sup>1</sup> H/ <sup>13</sup> C-NMR Compound <b>5a</b> .....   | S6  |
| <sup>1</sup> H/ <sup>13</sup> C-NMR Compound <b>5b</b> .....   | S8  |
| <sup>1</sup> H/ <sup>13</sup> C-NMR Compound <b>5a-1</b> ..... | S10 |
| <sup>1</sup> H/ <sup>13</sup> C-NMR Compound <b>5b-1</b> ..... | S11 |
| <sup>1</sup> H/ <sup>13</sup> C-NMR Compound <b>6a</b> .....   | S12 |
| <sup>1</sup> H/ <sup>13</sup> C-NMR Compound <b>6b</b> .....   | S13 |
| <sup>1</sup> H/ <sup>13</sup> C-NMR Compound <b>7a</b> .....   | S14 |
| <sup>1</sup> H/ <sup>13</sup> C-NMR Compound <b>7b</b> .....   | S15 |
| <sup>1</sup> H/ <sup>13</sup> C-NMR Compound <b>7a-1</b> ..... | S16 |
| <sup>1</sup> H/ <sup>13</sup> C-NMR Compound <b>7b-1</b> ..... | S17 |
| <sup>1</sup> H/ <sup>13</sup> C-NMR Compound <b>8a</b> .....   | S18 |
| <sup>1</sup> H/ <sup>13</sup> C-NMR Compound <b>8b</b> .....   | S19 |
| <sup>1</sup> H/ <sup>13</sup> C-NMR Compound <b>8c</b> .....   | S20 |
| <sup>1</sup> H/ <sup>13</sup> C-NMR Compound <b>9a</b> .....   | S21 |
| <sup>1</sup> H/ <sup>13</sup> C-NMR Compound <b>9b</b> .....   | S22 |
| <sup>1</sup> H/ <sup>13</sup> C-NMR Compound <b>9c</b> .....   | S23 |
| <sup>1</sup> H/ <sup>13</sup> C-NMR Compound <b>9d</b> .....   | S24 |
| <sup>1</sup> H/ <sup>13</sup> C-NMR Compound <b>9e</b> .....   | S25 |
| <sup>1</sup> H/ <sup>13</sup> C-NMR Compound <b>9f</b> .....   | S26 |
| <sup>1</sup> H/ <sup>13</sup> C-NMR Compound <b>9g</b> .....   | S27 |
| <sup>1</sup> H/ <sup>13</sup> C-NMR Compound <b>10a</b> .....  | S28 |
| <sup>1</sup> H/ <sup>13</sup> C-NMR Compound <b>10b</b> .....  | S29 |
| <sup>1</sup> H/ <sup>13</sup> C-NMR Compound <b>10c</b> .....  | S30 |
| <sup>1</sup> H/ <sup>13</sup> C-NMR Compound <b>11a</b> .....  | S31 |
| <sup>1</sup> H/ <sup>13</sup> C-NMR Compound <b>11b</b> .....  | S32 |
| <sup>1</sup> H/ <sup>13</sup> C-NMR Compound <b>11c</b> .....  | S33 |
| <sup>1</sup> H/ <sup>13</sup> C-NMR Compound <b>11d</b> .....  | S34 |
| <sup>1</sup> H/ <sup>13</sup> C-NMR Compound <b>11e</b> .....  | S35 |
| <sup>1</sup> H/ <sup>13</sup> C-NMR Compound <b>11f</b> .....  | S36 |

## Copies of NMR spectra

**{(4*R*,6*S*,7*R*,9*R*,11*S*)-4-[(4*S*,5*S*)-4,5-Dicyclohexyl-1,3,2-dioxaborolan-2-yl]-6-[(4-methoxybenzyl)oxy]-7,9,11-trimethyl-12-(trityloxy)dodec-1-yn-1-yl}trimethylsilane (2a)**

<sup>1</sup>H-NMR (400 MHz, CDCl<sub>3</sub>)

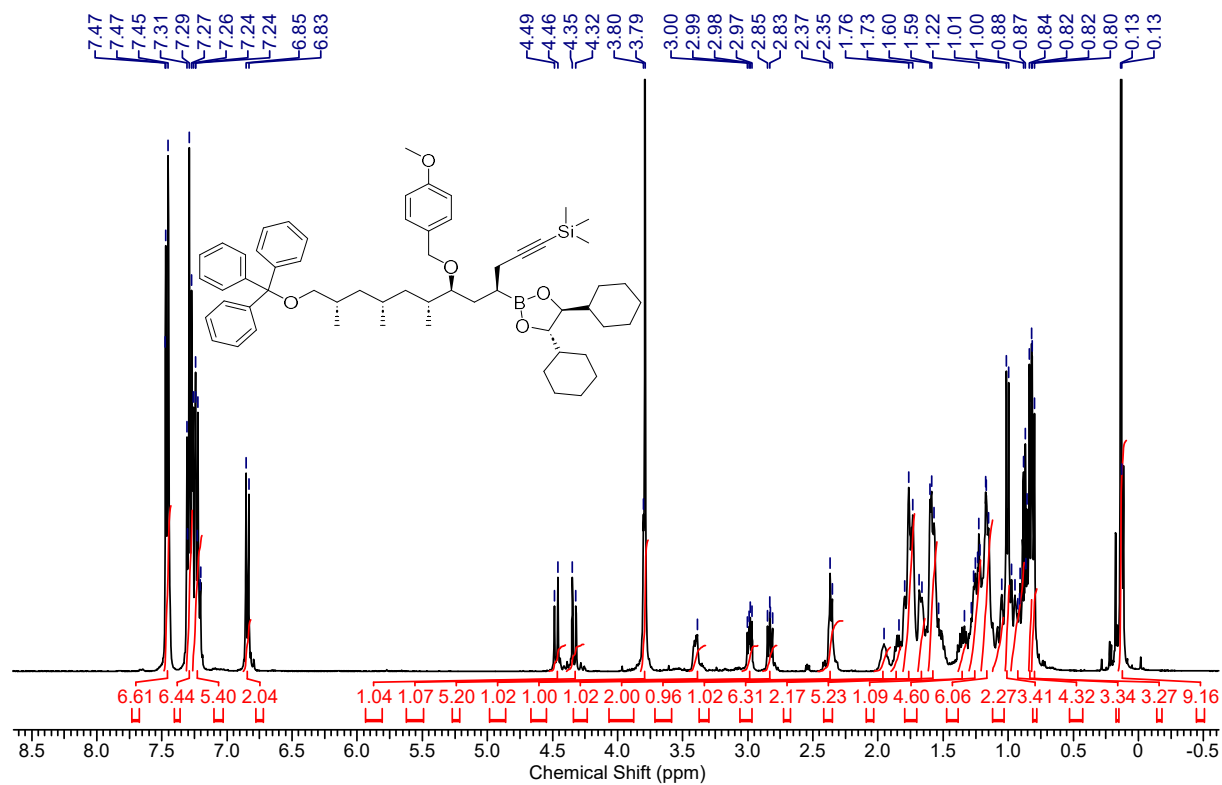

<sup>13</sup>C-NMR (100 MHz, CDCl<sub>3</sub>)

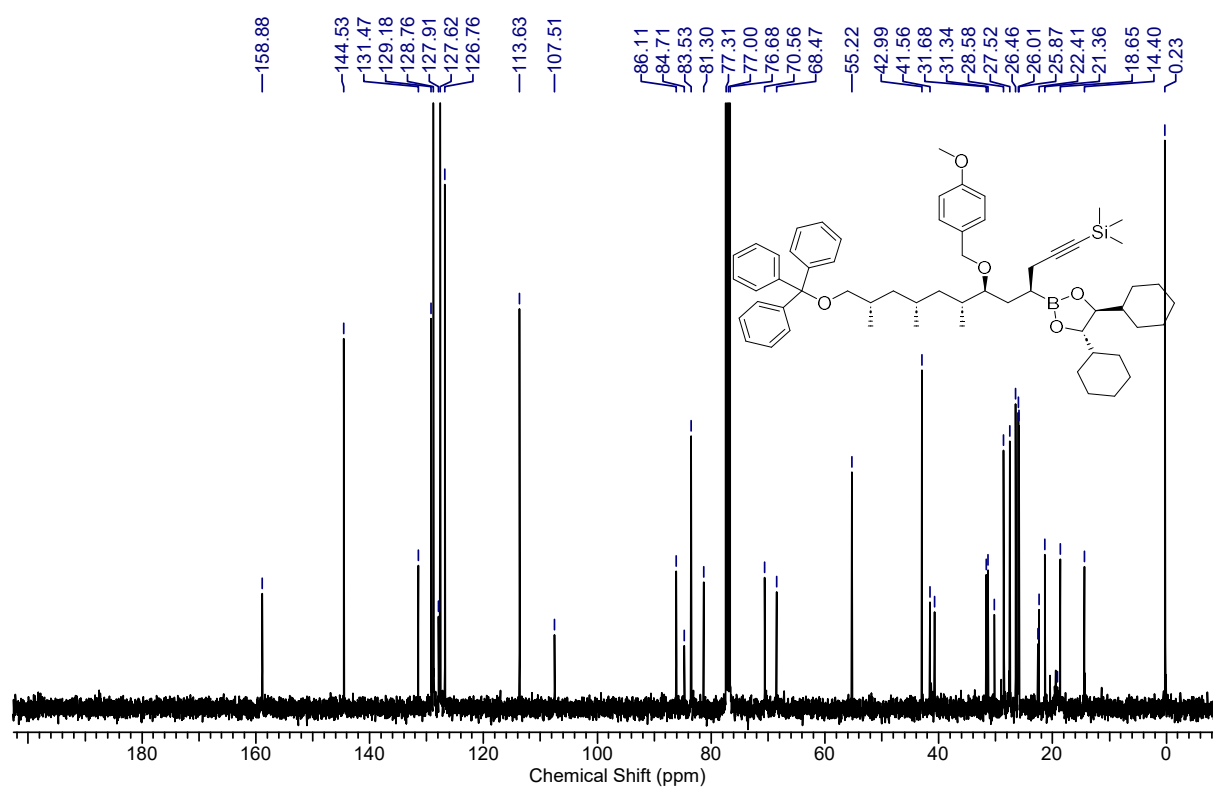

**(4*S*,5*S*)-4,5-Dicyclohexyl-2-[(4*R*,6*S*,7*R*,9*R*,11*S*)-6-[(4-methoxybenzyl)oxy]-7,9,11-trimethyl-12-(trityloxy)dodec-1-en-4-yl]-1,3,2-dioxaborolane (2b)**

<sup>1</sup>H-NMR (400 MHz, CDCl<sub>3</sub>)

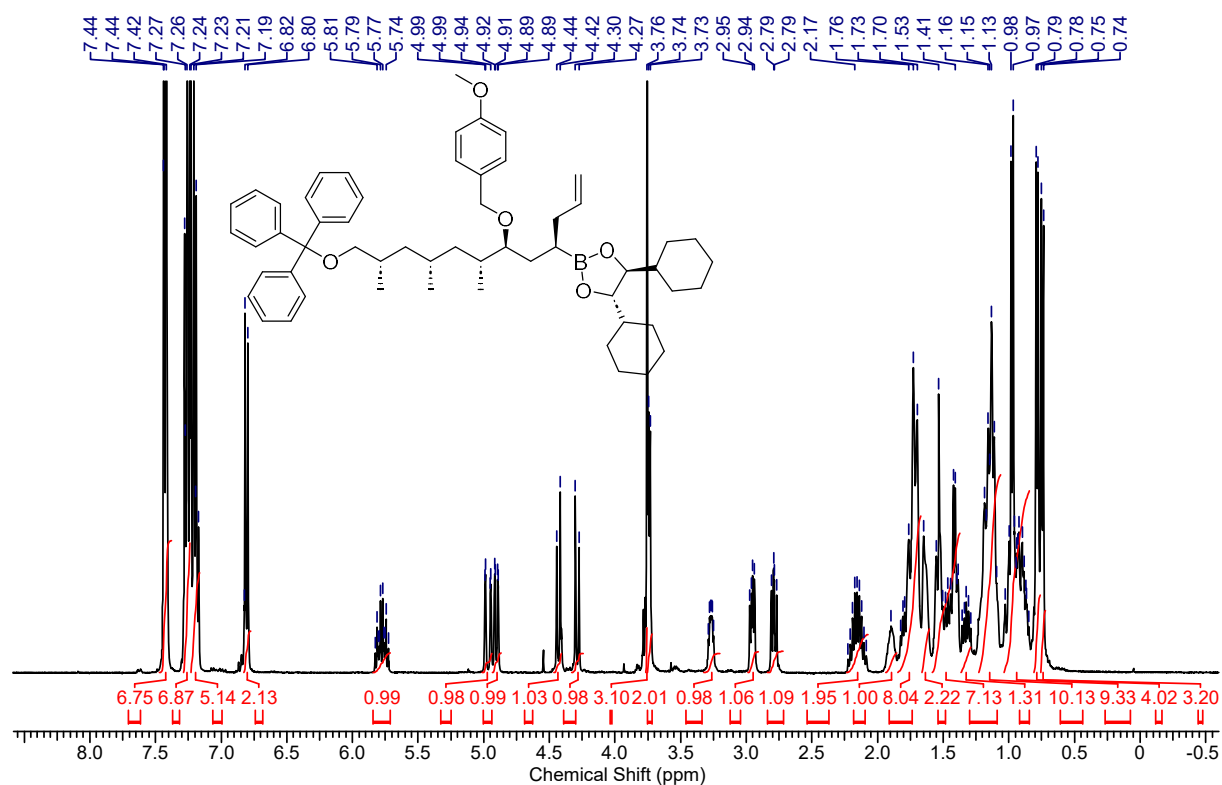

<sup>13</sup>C-NMR (100 MHz, CDCl<sub>3</sub>)

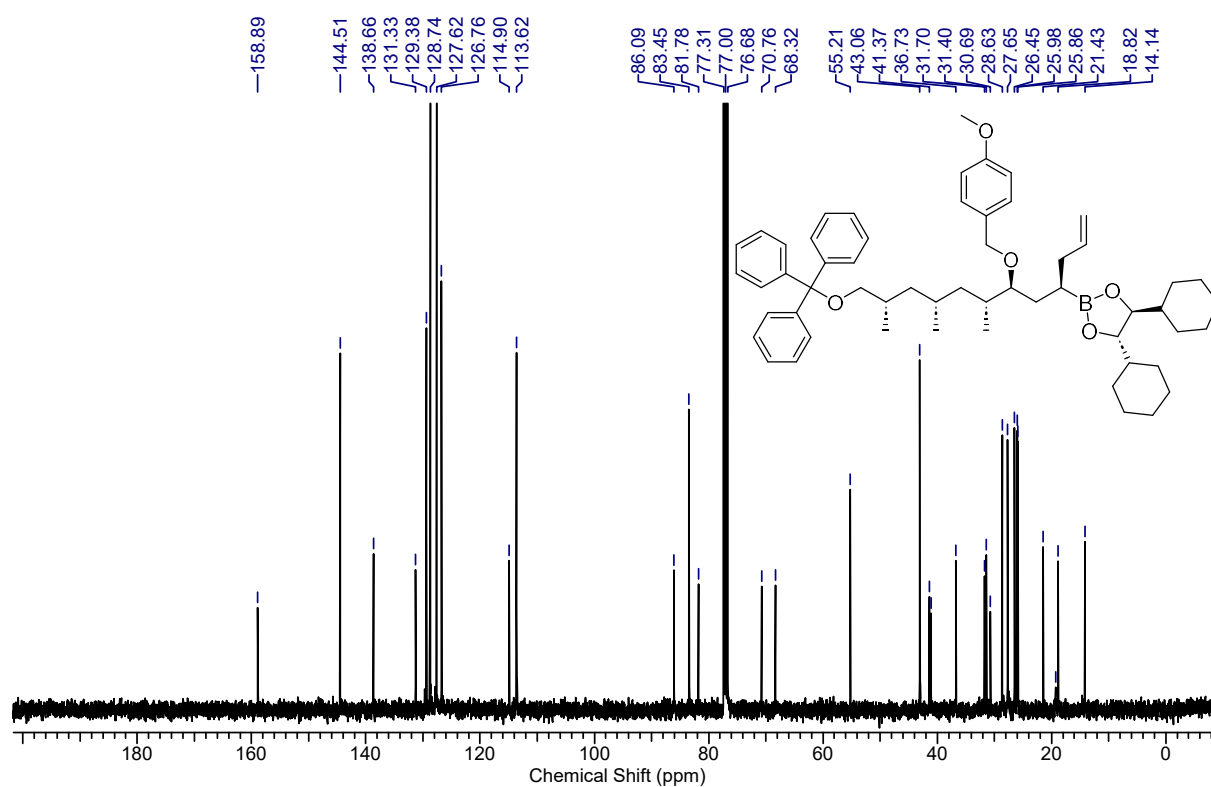

**(4*R*,6*S*,7*R*,9*R*,11*S*)-6-[(4-Methoxybenzyl)oxy]-7,9,11-trimethyl-1-(trimethylsilyl)-12-(trityloxy)dodec-1-yn-4-ol (3a)**

<sup>1</sup>H-NMR (400 MHz, CDCl<sub>3</sub>)

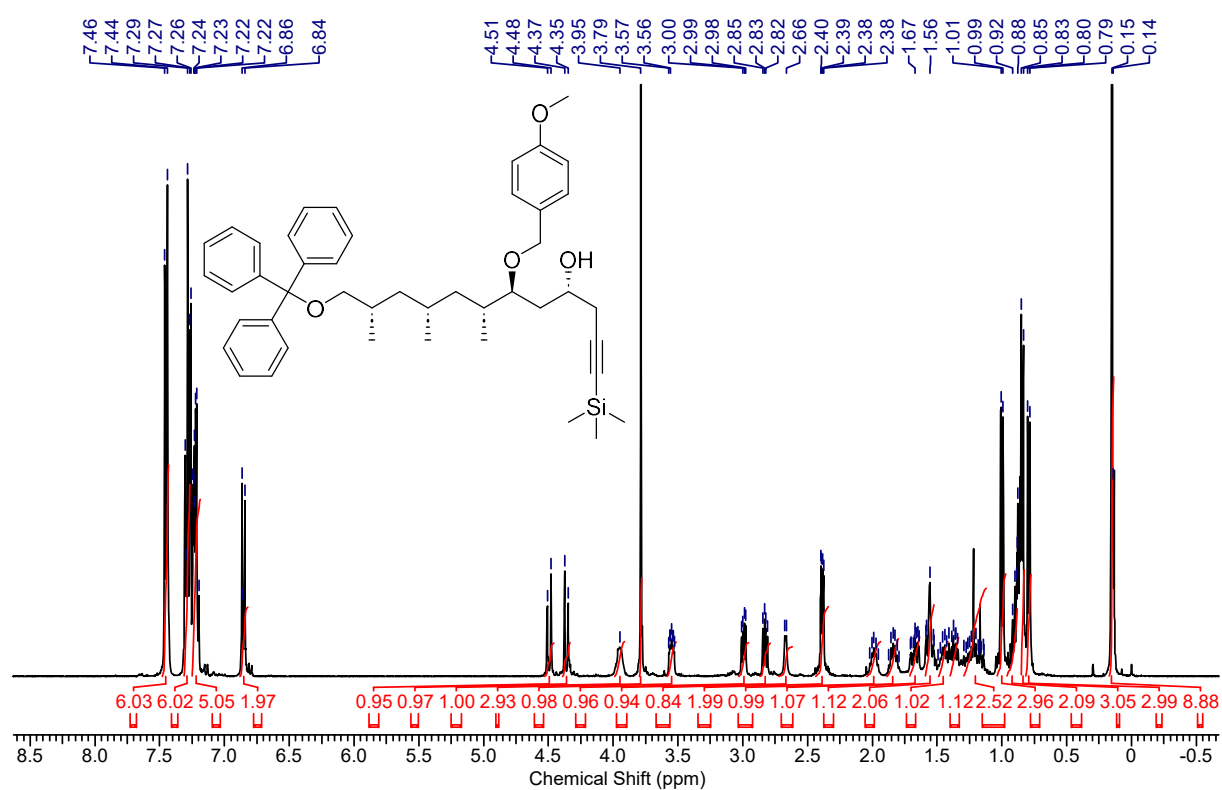

<sup>13</sup>C-NMR (100 MHz, CDCl<sub>3</sub>)

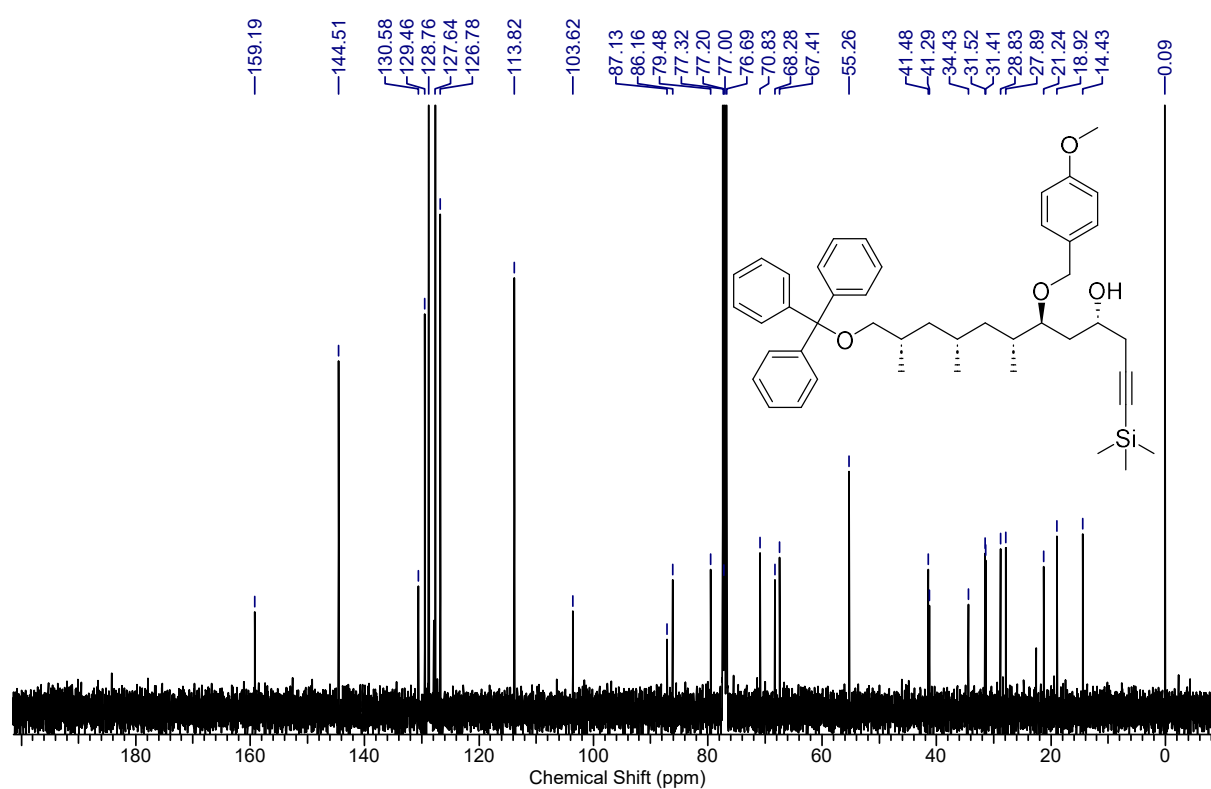

**(4*R*,6*S*,7*R*,9*R*,11*S*)-6-[(4-Methoxybenzyl)oxy]-7,9,11-trimethyl-12-(trityloxy)dodec-1-en-4-ol (3b)**

<sup>1</sup>H-NMR (400 MHz, CDCl<sub>3</sub>)

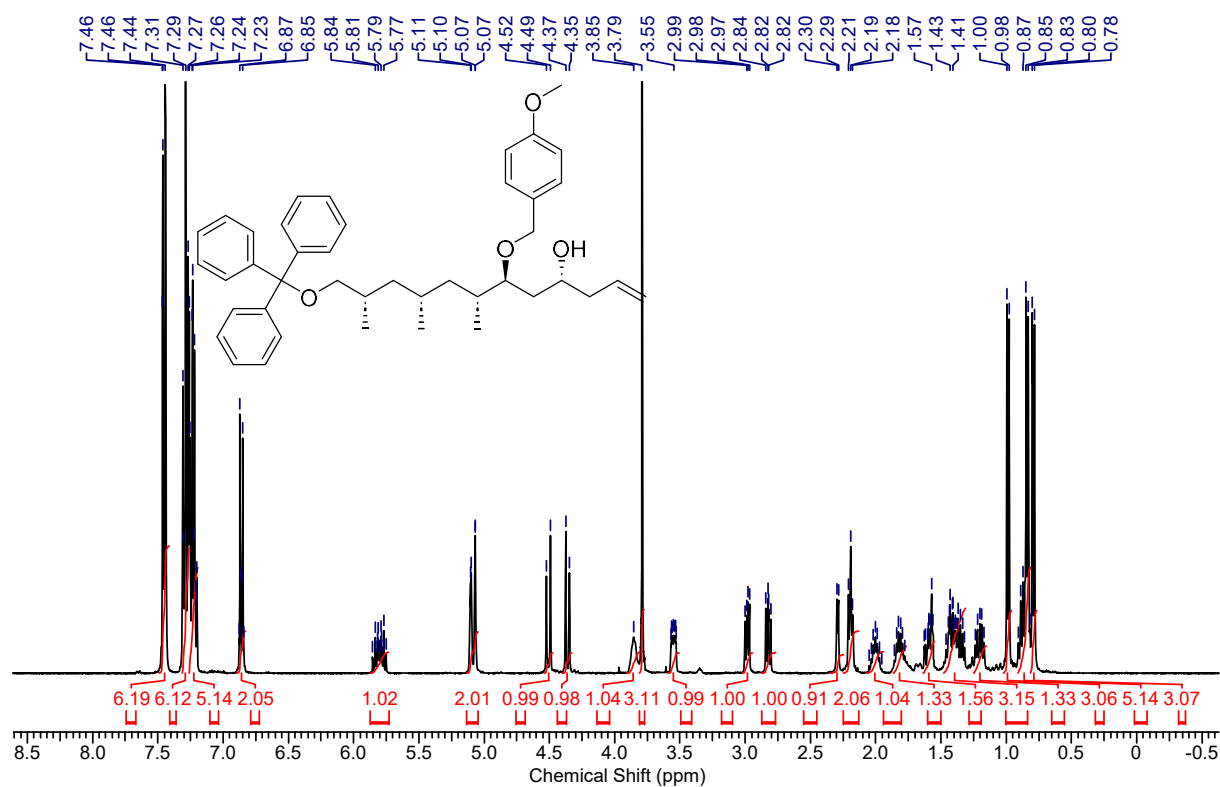

<sup>13</sup>C-NMR (100 MHz, CDCl<sub>3</sub>)

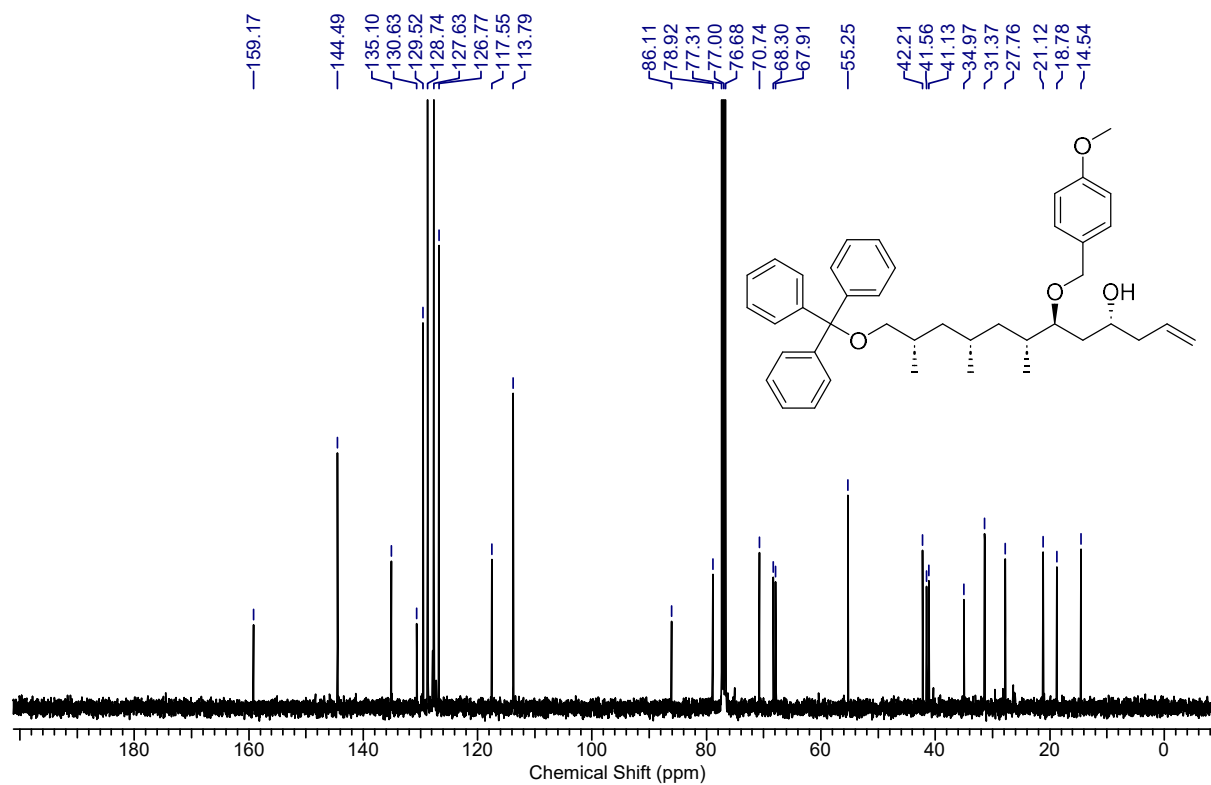

**(4*R*,6*S*,7*R*,9*R*,11*S*)-6-[(4-Methoxybenzyl)oxy]-7,9,11-trimethyl-1-(trimethylsilyl)-12-(trityloxy)dodec-1-yn-4-yl (*R*)-3-[4-(allyloxy)-3-iodophenyl]-2-[(*tert*-butoxycarbonyl)(methyl)amino]propanoate (5a)**

<sup>1</sup>H-NMR (500 MHz, 373 K, DMSO-D<sub>6</sub>)

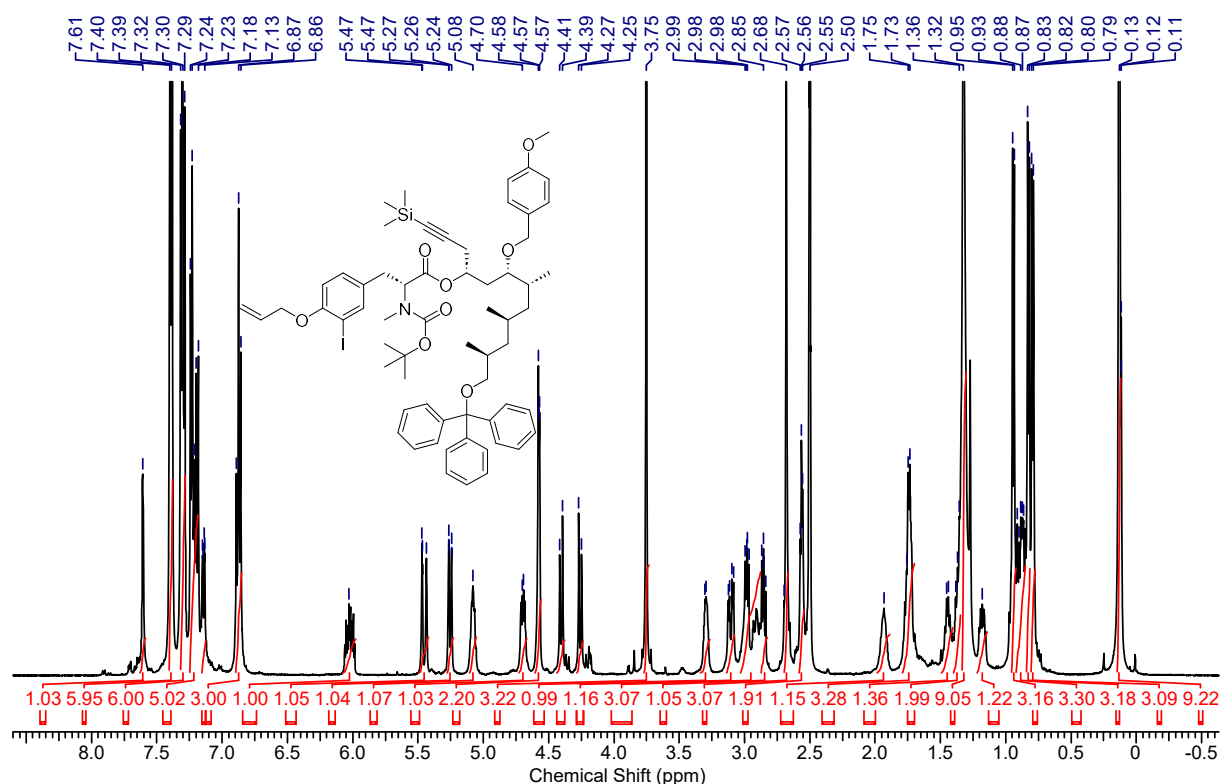

<sup>13</sup>C-NMR (125 MHz, 373 K, DMSO-D<sub>6</sub>)

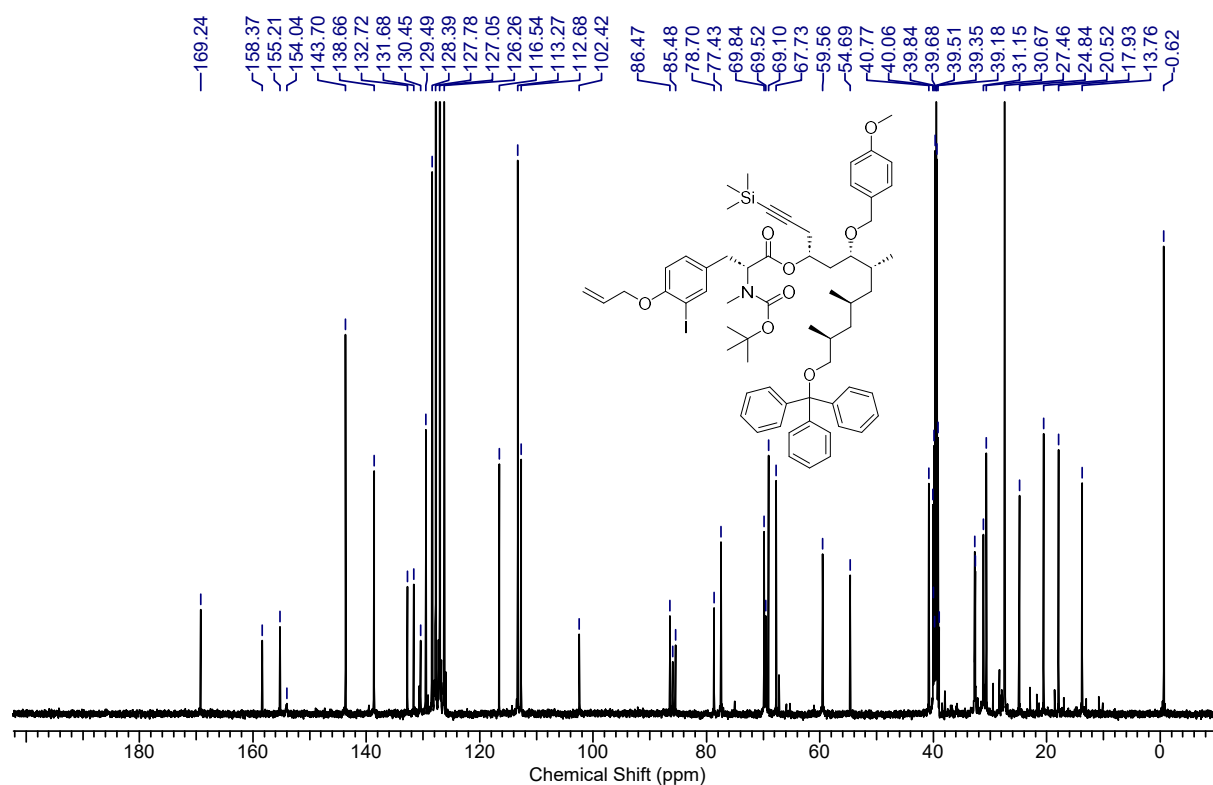

<sup>1</sup>H-NMR (500 MHz, CDCl<sub>3</sub>)

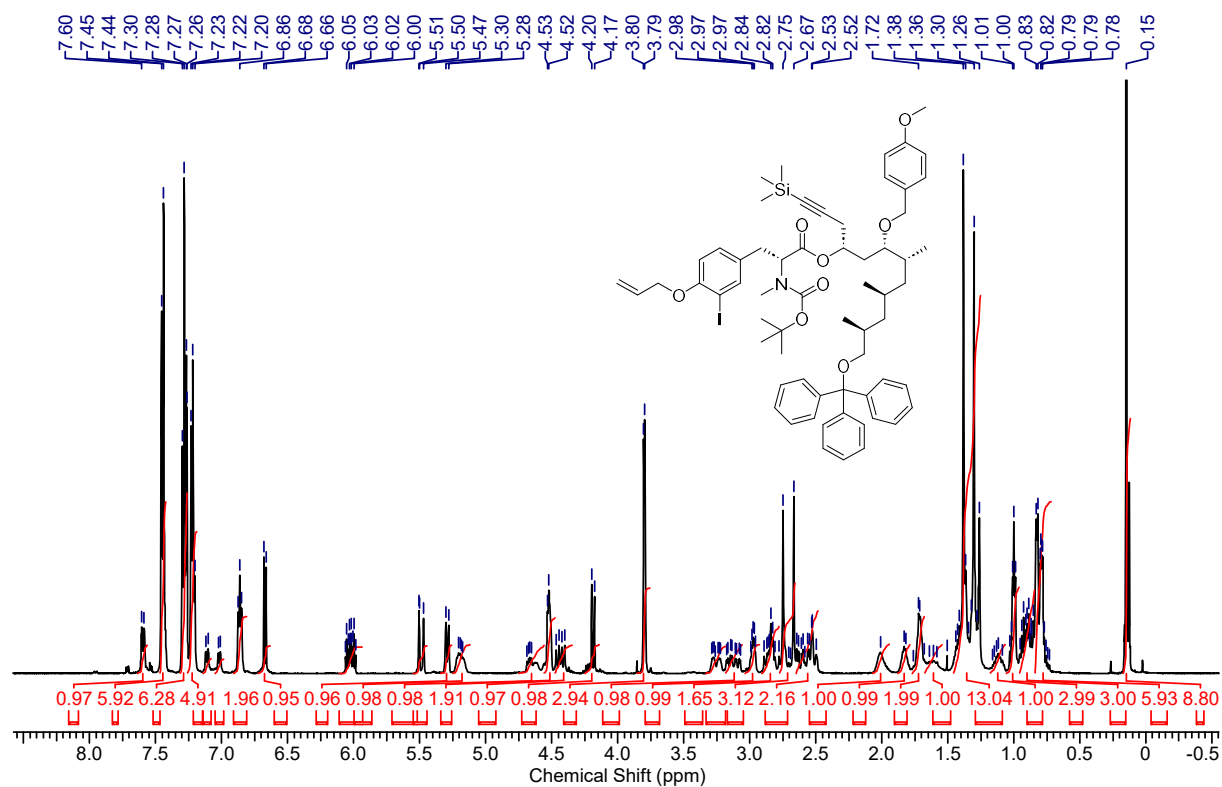

<sup>13</sup>C-NMR (125 MHz, CDCl<sub>3</sub>)

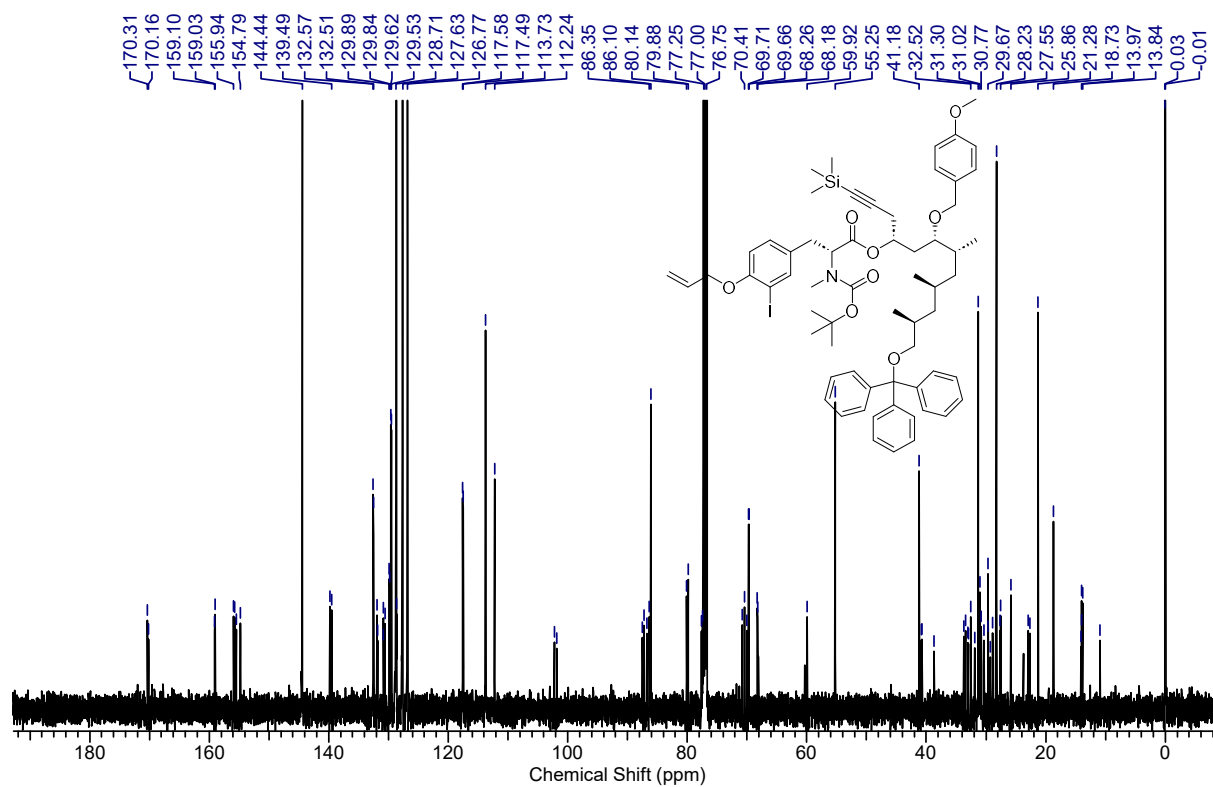

**(4*R*,6*S*,7*R*,9*R*,11*S*)-6-[[4-Methoxybenzyl]oxy]-7,9,11-trimethyl-12-(trityloxy)dodec-1-en-4-yl (R)-3-[4-(allyloxy)-3-iodophenyl]-2-[(*tert*-butoxycarbonyl)(methyl)amino]propanoate (5b)**

<sup>1</sup>H-NMR (500 MHz, 373 K, DMSO-D<sub>6</sub>)

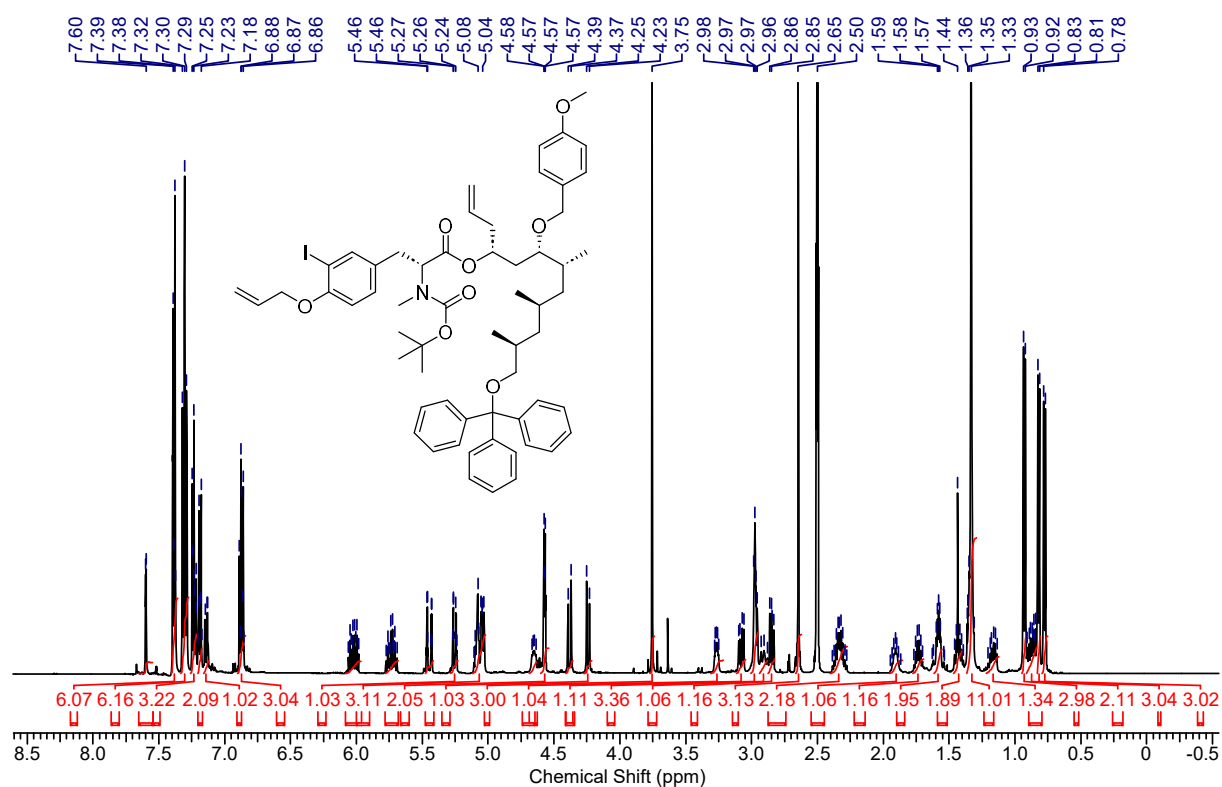

<sup>13</sup>C-NMR (125 MHz, 373 K, DMSO-D<sub>6</sub>)

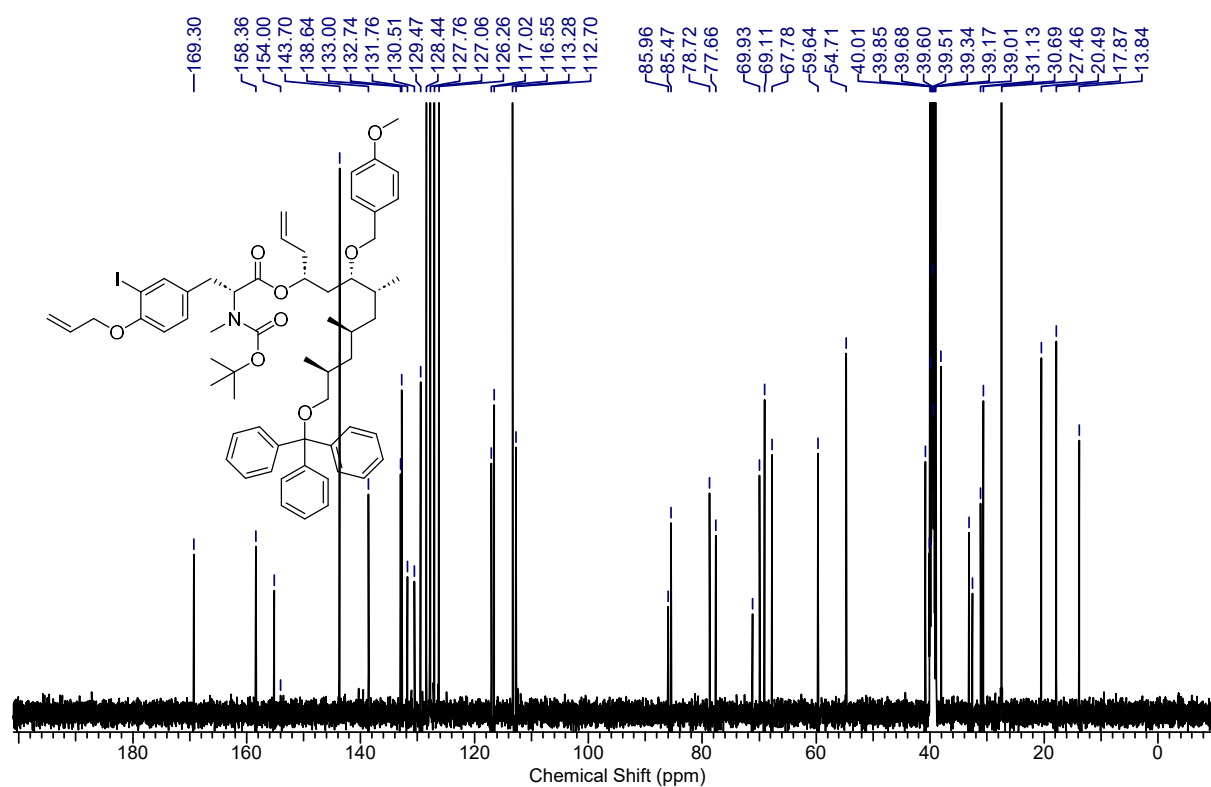



<sup>1</sup>H-NMR (400 MHz, CDCl<sub>3</sub>)

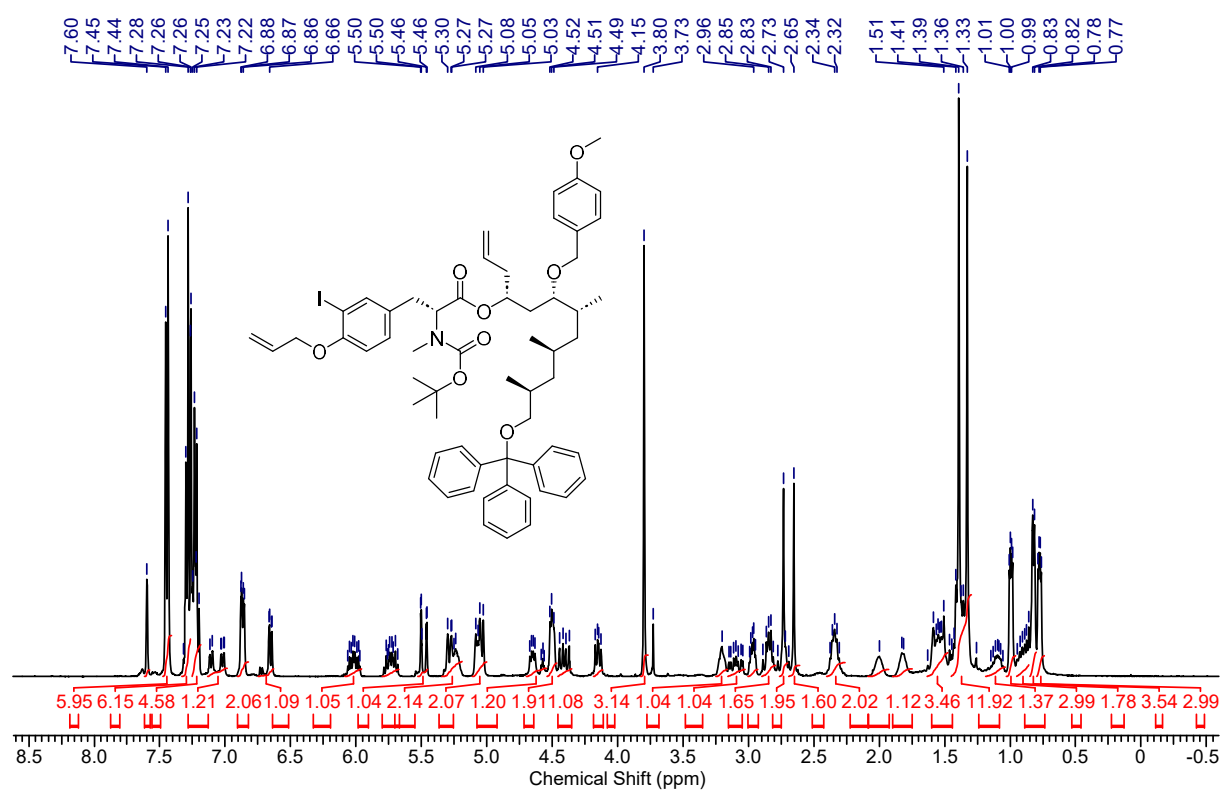

<sup>13</sup>C-NMR (100 MHz, CDCl<sub>3</sub>)

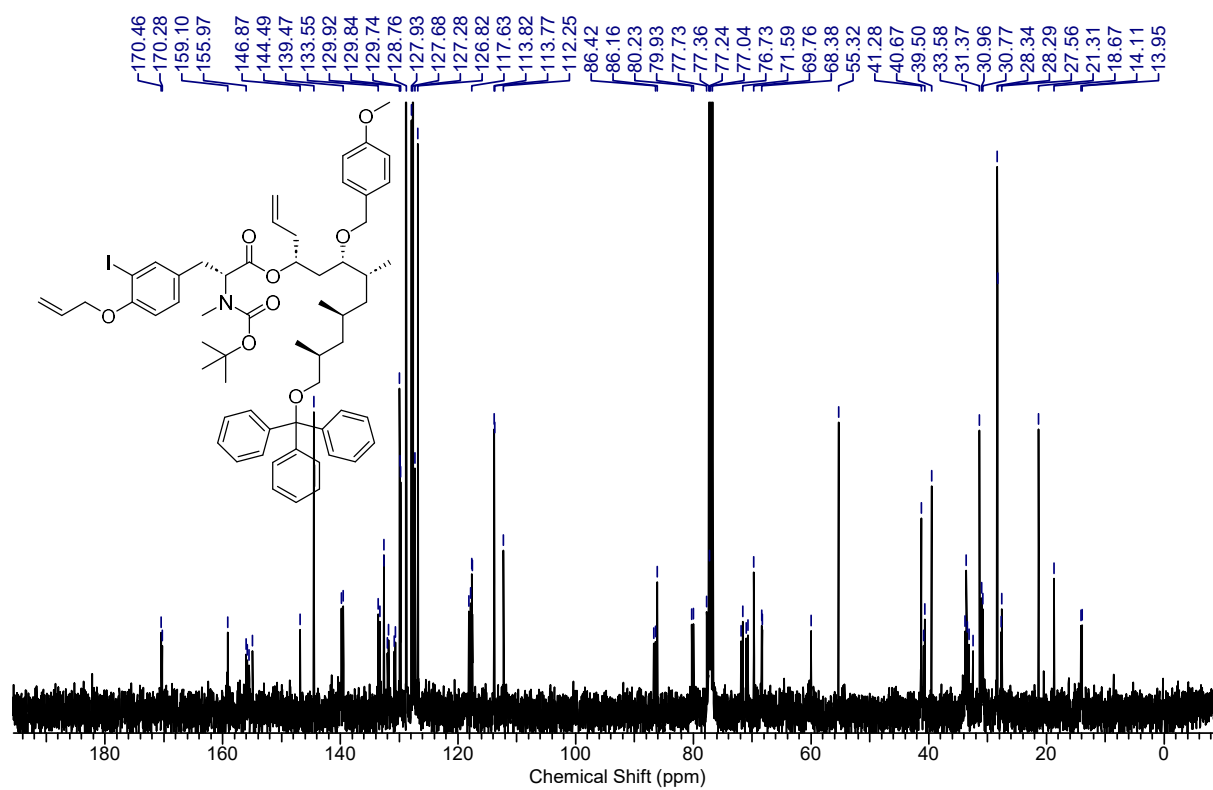

**(4*R*,6*S*,7*R*,9*R*,11*S*)-12-Hydroxy-6-[(4-methoxybenzyl)oxy]-7,9,11-trimethyl-1-(trimethylsilyl)dodec-1-yn-4-yl (*R*)-3-[4-(allyloxy)-3-iodophenyl]-2-[(*tert*-butoxycarbonyl)(methyl)amino]propanoate (5a-1)**

<sup>1</sup>H-NMR (500 MHz, 373 K, DMSO-D<sub>6</sub>)

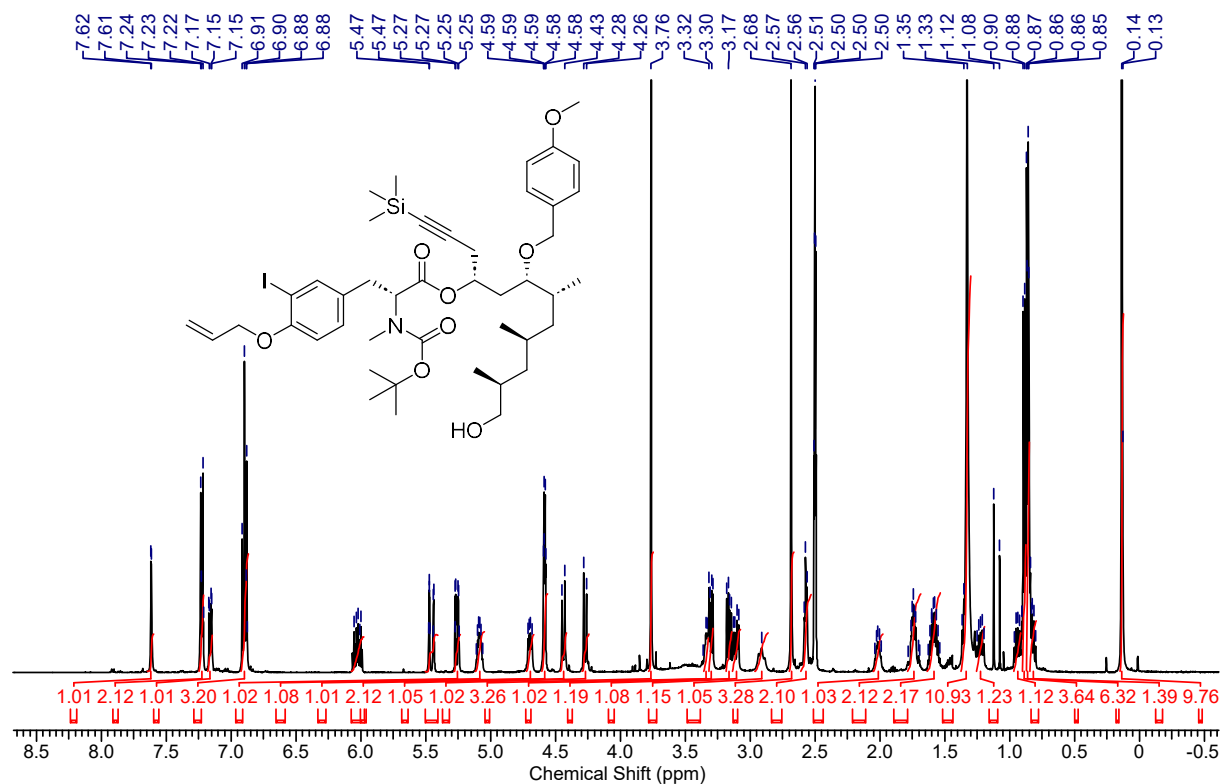

<sup>13</sup>C-NMR (125 MHz, 373 K, DMSO-D<sub>6</sub>)

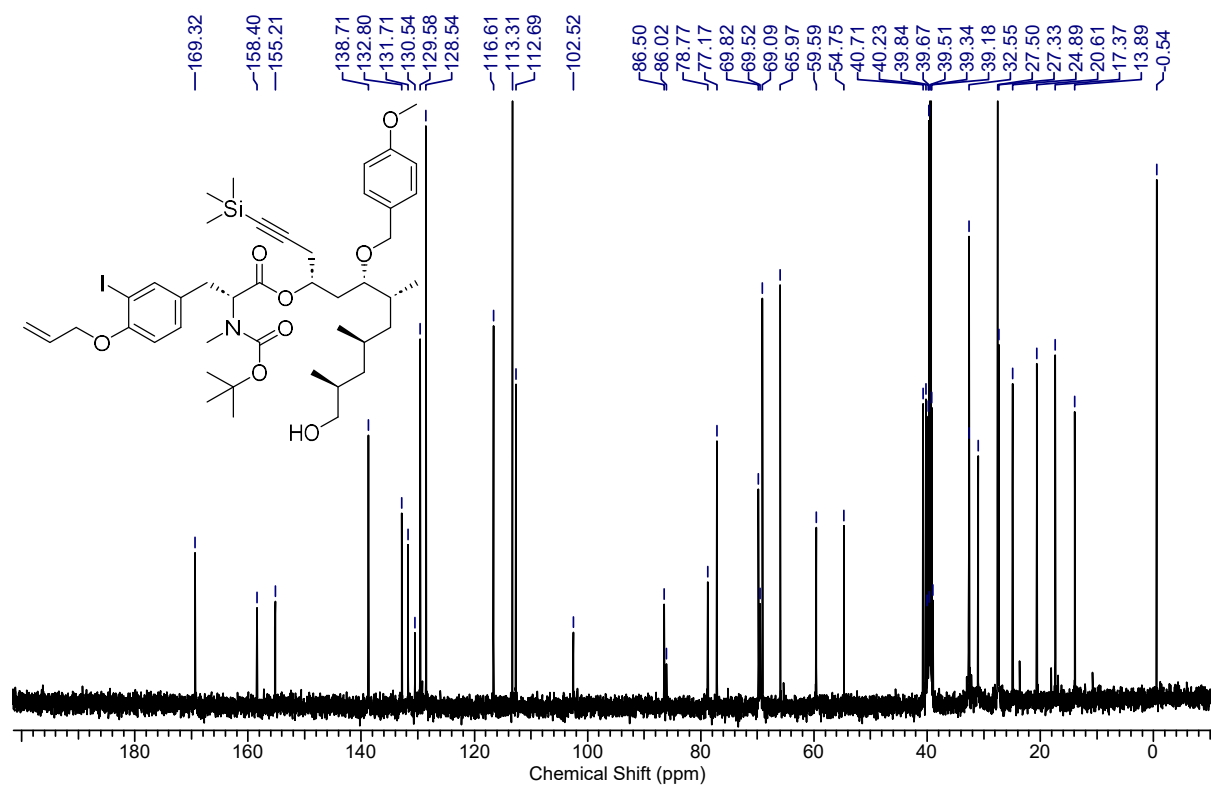

**(4*R*,6*S*,7*R*,9*R*,11*S*)-12-Hydroxy-6-[(4-methoxybenzyl)oxy]-7,9,11-trimethyldodec-1-en-4-yl (R)-3-[4-(allyloxy)-3-iodophenyl]-2-[(*tert*-butoxycarbonyl)(methyl)amino]propanoate (5b-1)**

<sup>1</sup>H-NMR (500 MHz, 373 K, DMSO-D<sub>6</sub>)

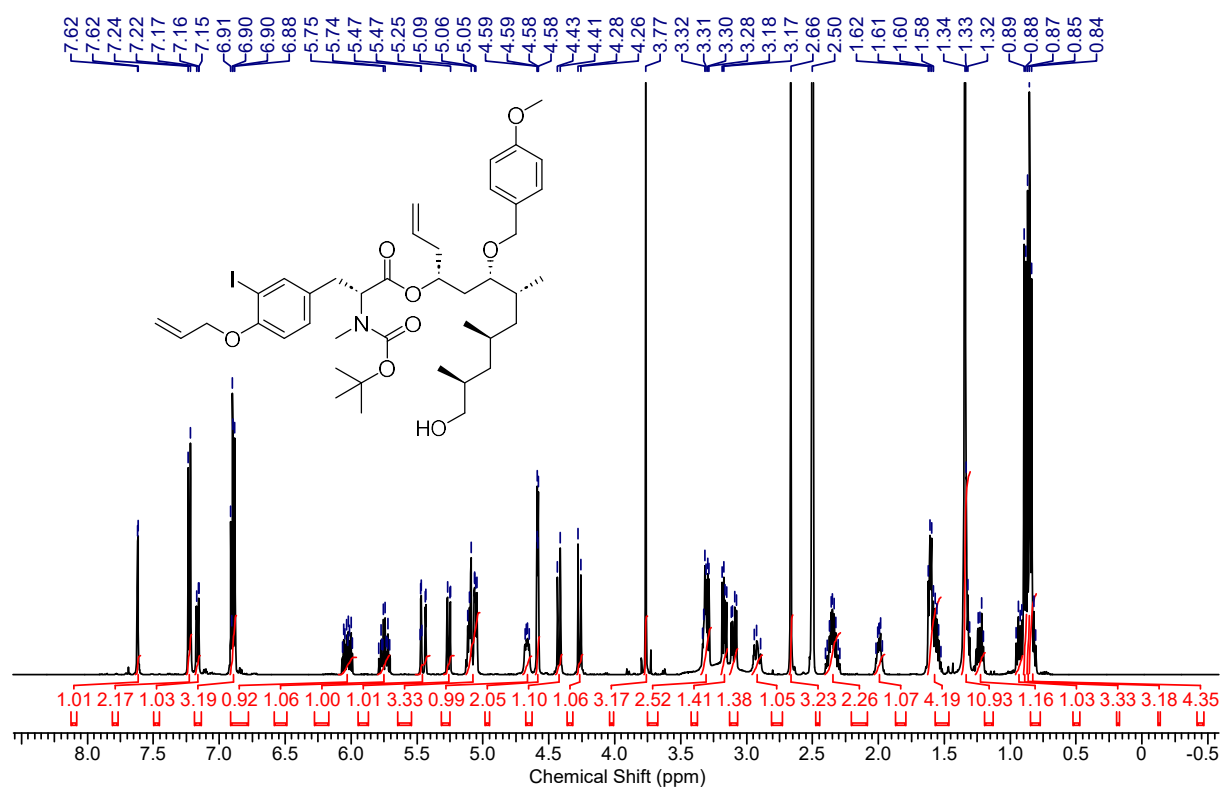

<sup>13</sup>C-NMR (125 MHz, 373 K, DMSO-D<sub>6</sub>)

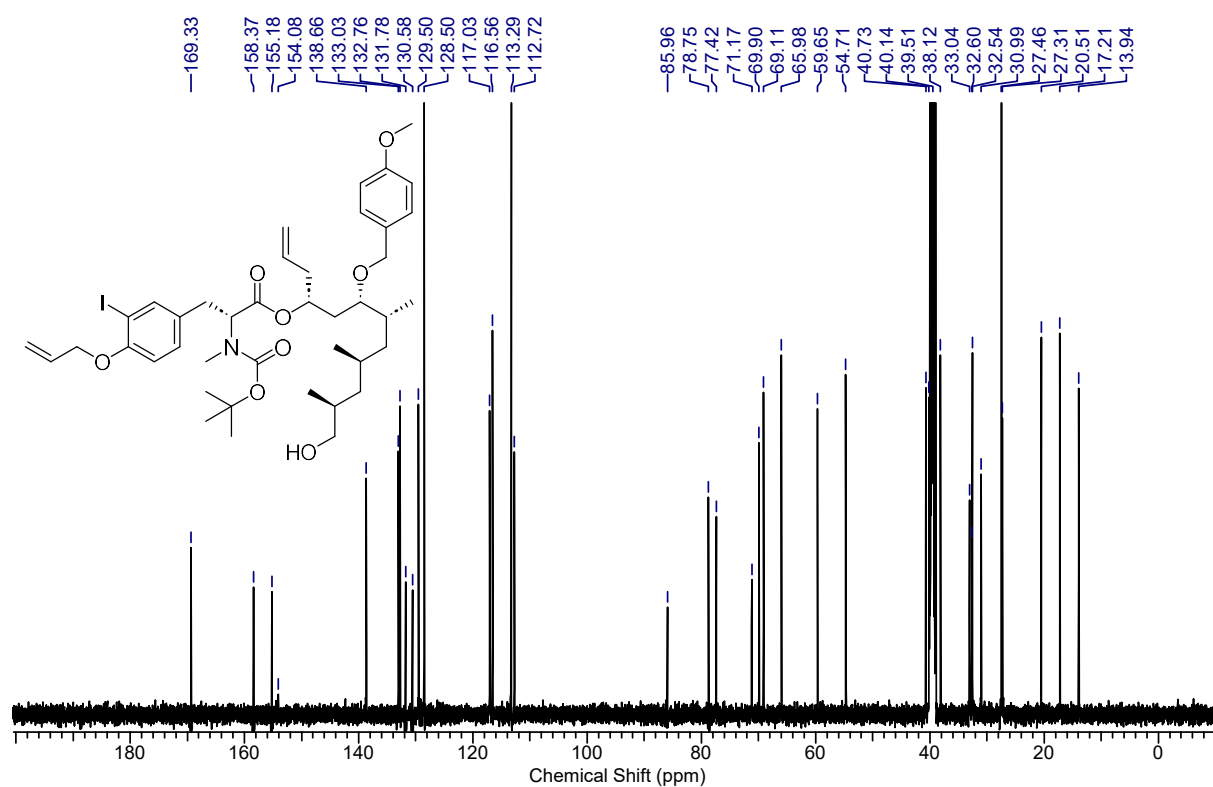

**(2*S*,4*S*,6*R*,7*S*,9*R*)-9-((*R*)-3-[4-(Allyloxy)-3-iodophenyl]-2-[(*tert*-butoxycarbonyl)(methyl)amino]propanoyl)oxy)-7-[(4-methoxybenzyl)oxy]-2,4,6-trimethyl-12-(trimethylsilyl)dodec-11-ynoic acid (6a)**

<sup>1</sup>H-NMR (500 MHz, 373 K, DMSO-D<sub>6</sub>)

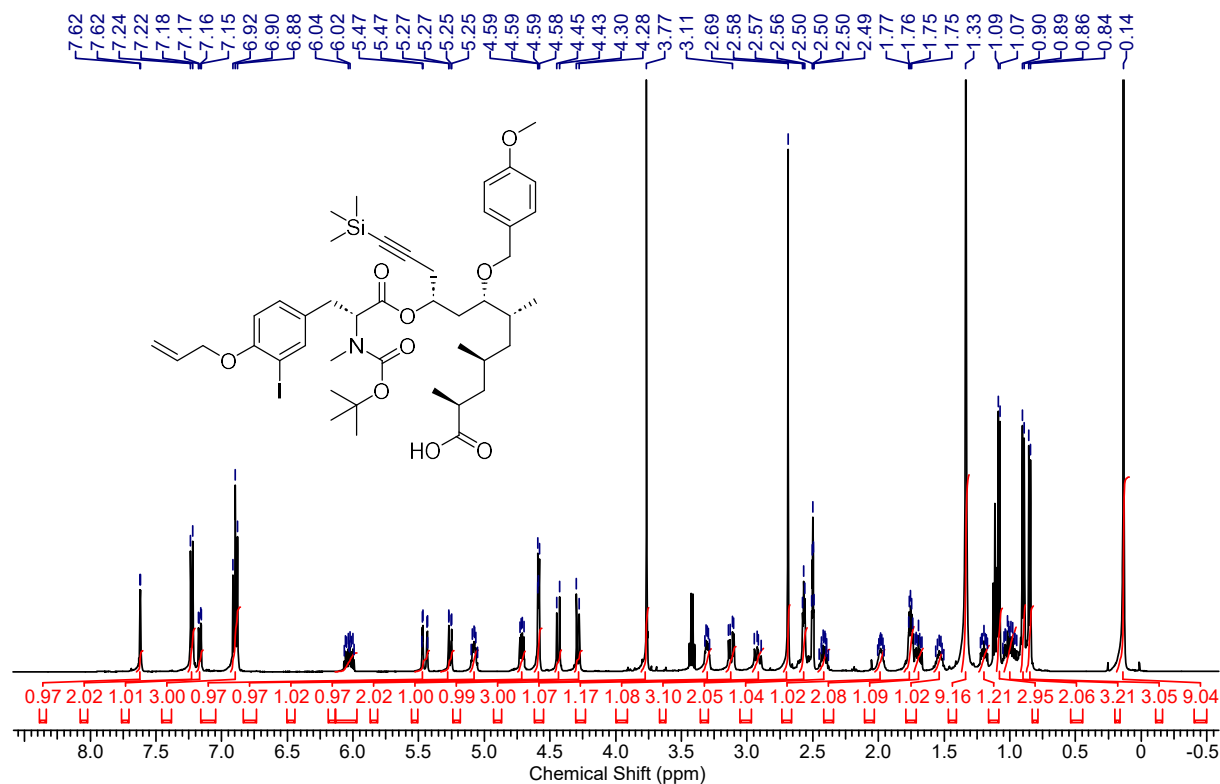

<sup>13</sup>C-NMR (125 MHz, 373 K, DMSO-D<sub>6</sub>)

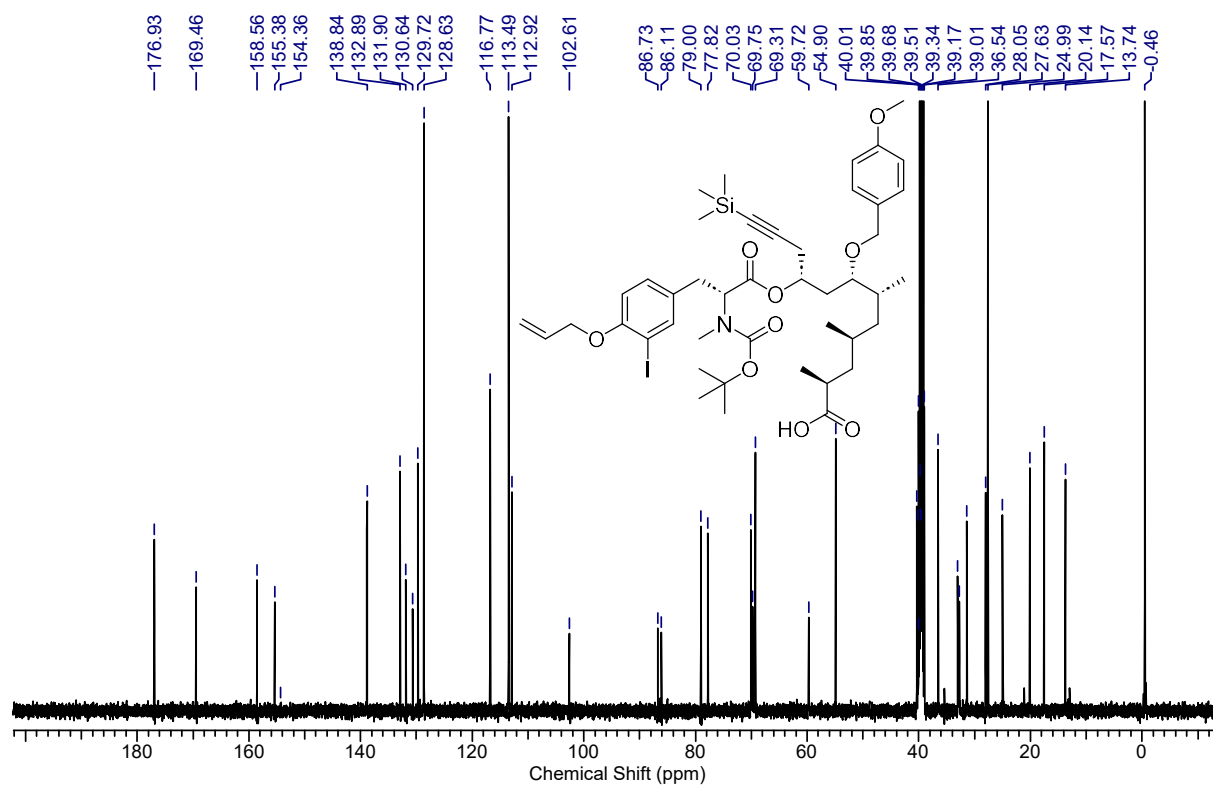

**(2*S*,4*S*,6*R*,7*S*,9*R*)-9-({(*R*)-3-[4-(Allyloxy)-3-iodophenyl]-2-[(*tert*-butoxycarbonyl)(methyl)amino]-propanoyl}oxy)-7-[(4-methoxybenzyl)oxy]-2,4,6-trimethyldodec-11-enoic acid (6b)**

<sup>1</sup>H-NMR (500 MHz, 373 K, DMSO-D<sub>6</sub>)

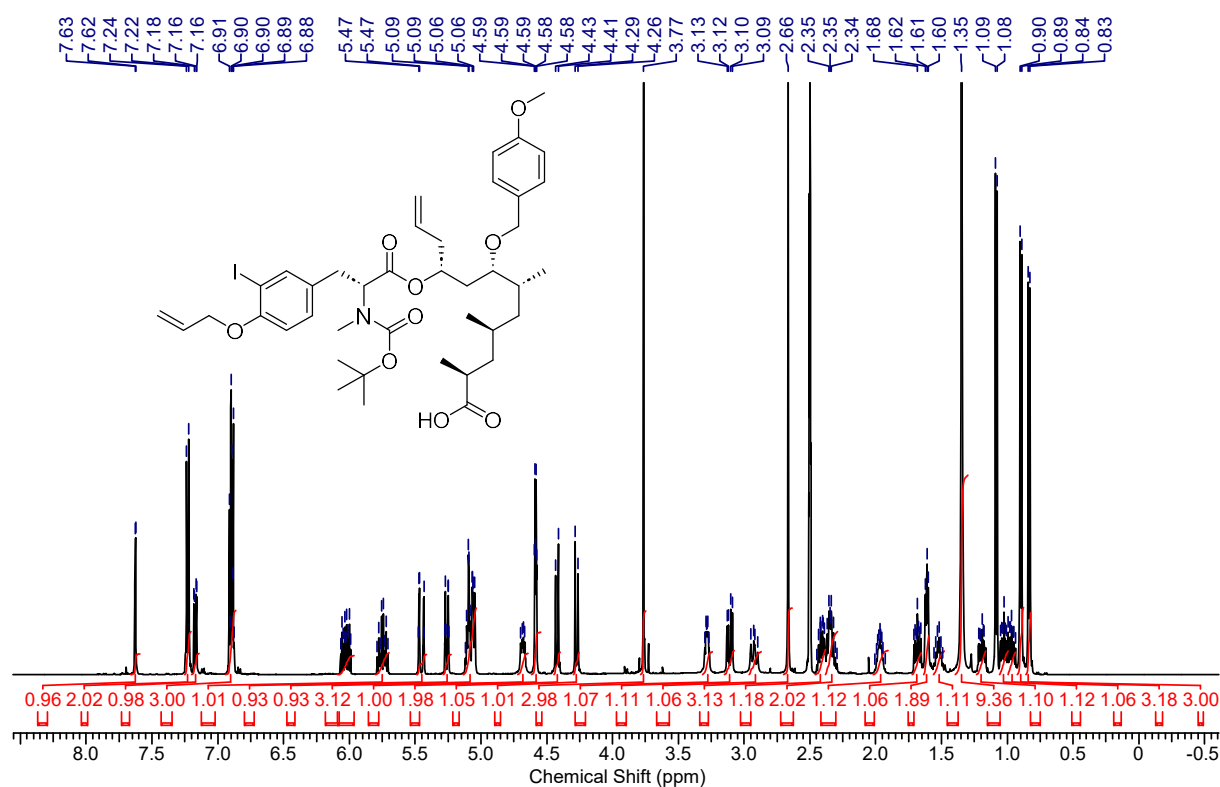

<sup>13</sup>C-NMR (125 MHz, 373 K, DMSO-D<sub>6</sub>)

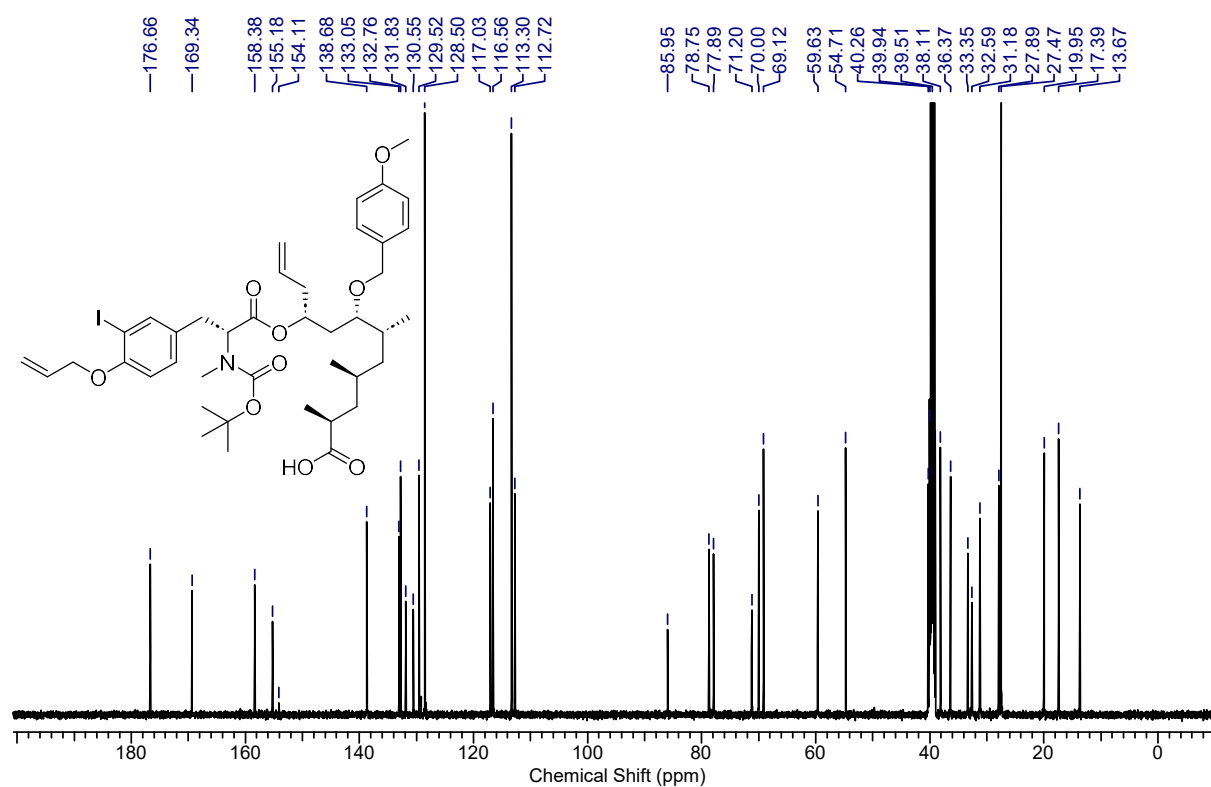

**(4*R*,6*S*,7*R*,9*S*,11*S*)-12-[[2-(*tert*-Butoxy)-2-oxoethyl]amino]-6-[(4-methoxybenzyl)oxy]-7,9,11-trimethyl-12-oxo-1-(trimethylsilyl)dodec-1-yn-4-yl (*R*)-3-[4-(allyloxy)-3-iodophenyl]-2-[(*tert*-butoxy-carbonyl)(methyl)amino]propanoate (7a)**

<sup>1</sup>H-NMR (500 MHz, CDCl<sub>3</sub>)

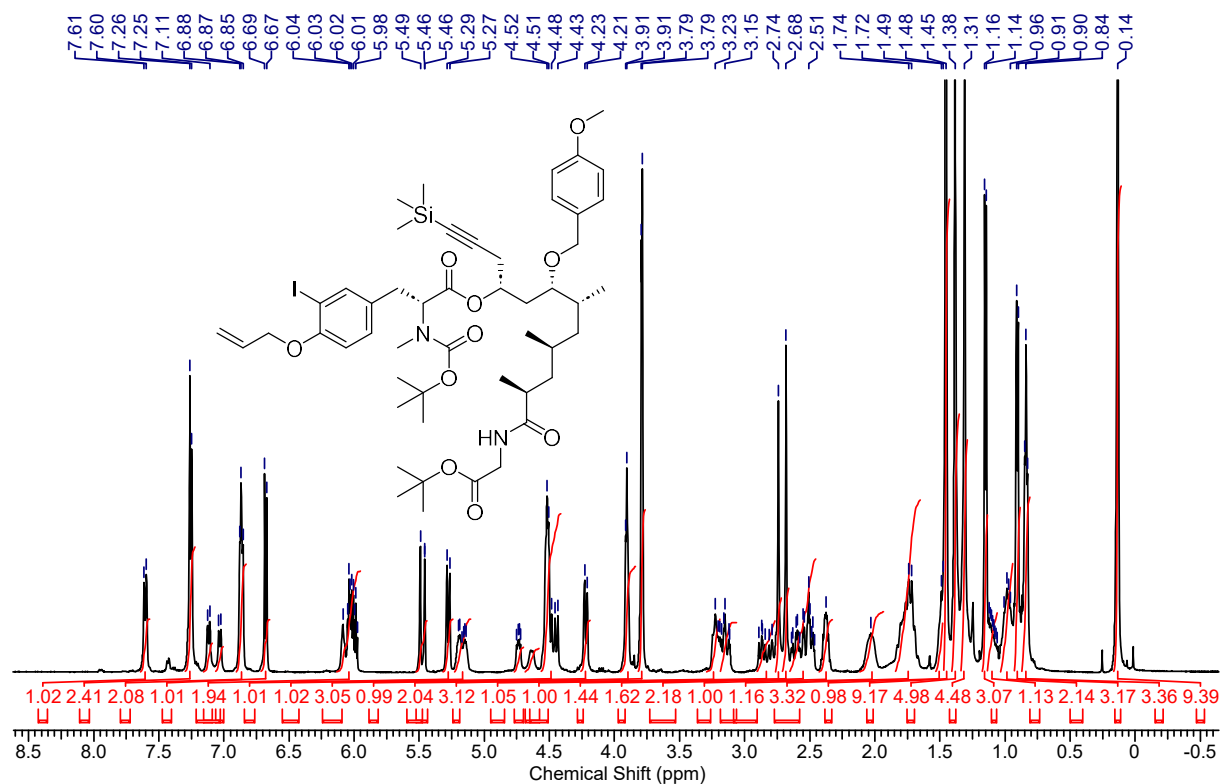

<sup>13</sup>C-NMR (125 MHz, CDCl<sub>3</sub>)

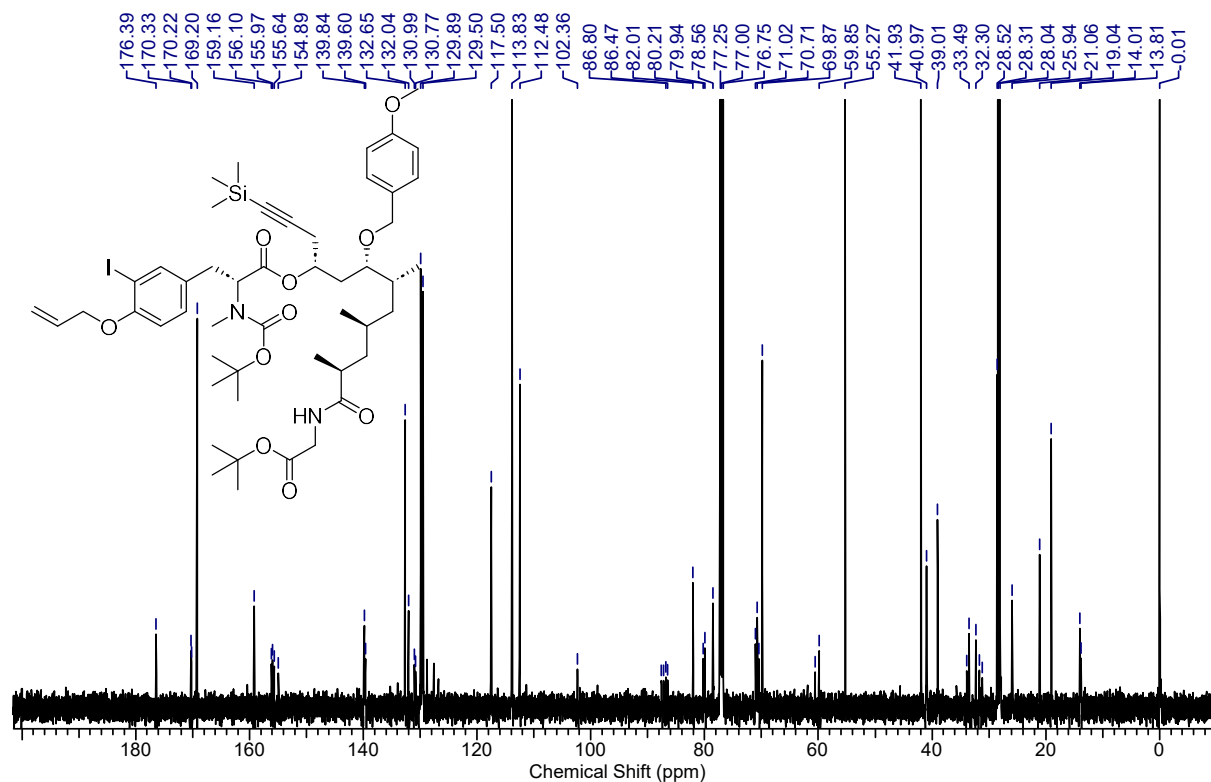

**(4*R*,6*S*,7*R*,9*S*,11*S*)-12-[[2-(*tert*-Butoxy)-2-oxoethyl]amino]-6-[(4-methoxybenzyl)oxy]-7,9,11-trimethyl-12-oxododec-1-en-4-yl (R)-3-[4-(allyloxy)-3-iodophenyl]-2-[(*tert*-butoxycarbonyl)(methyl)amino]propanoate (7b)**

<sup>1</sup>H-NMR (500 MHz, 373 K, DMSO-D<sub>6</sub>)

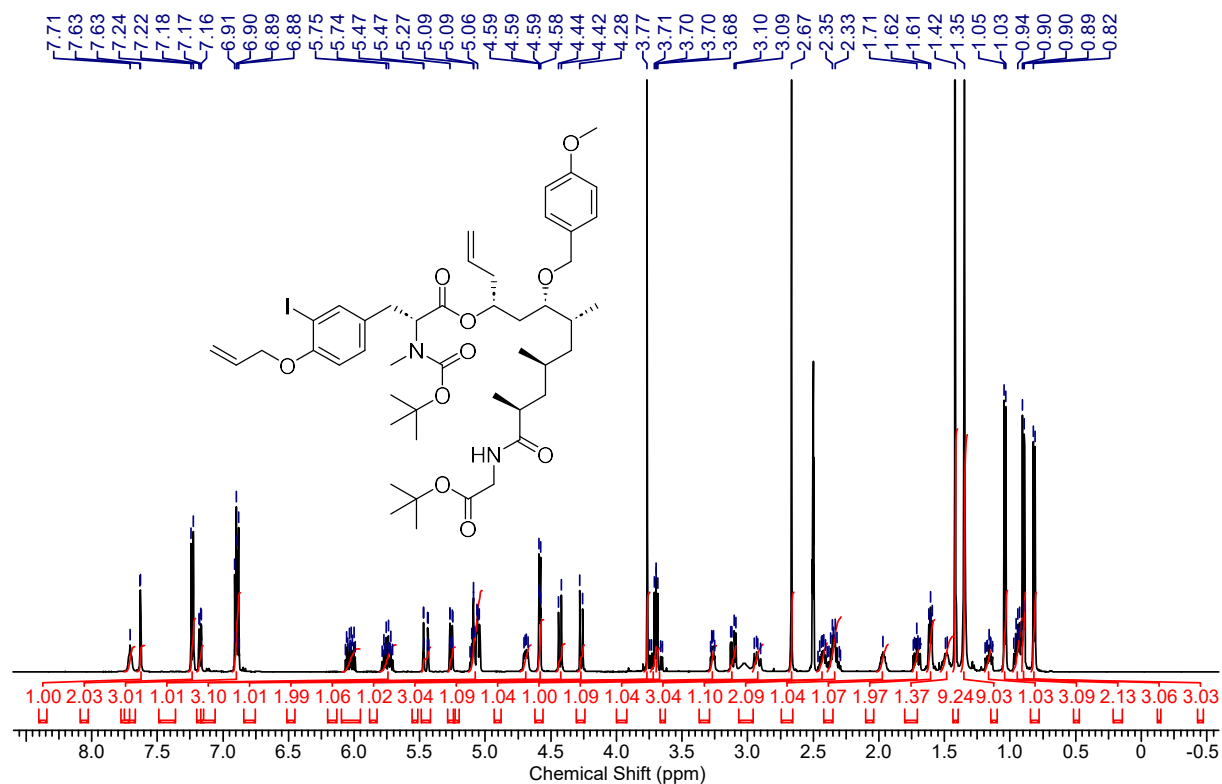

<sup>13</sup>C-NMR (125 MHz, 373 K, DMSO-D<sub>6</sub>)

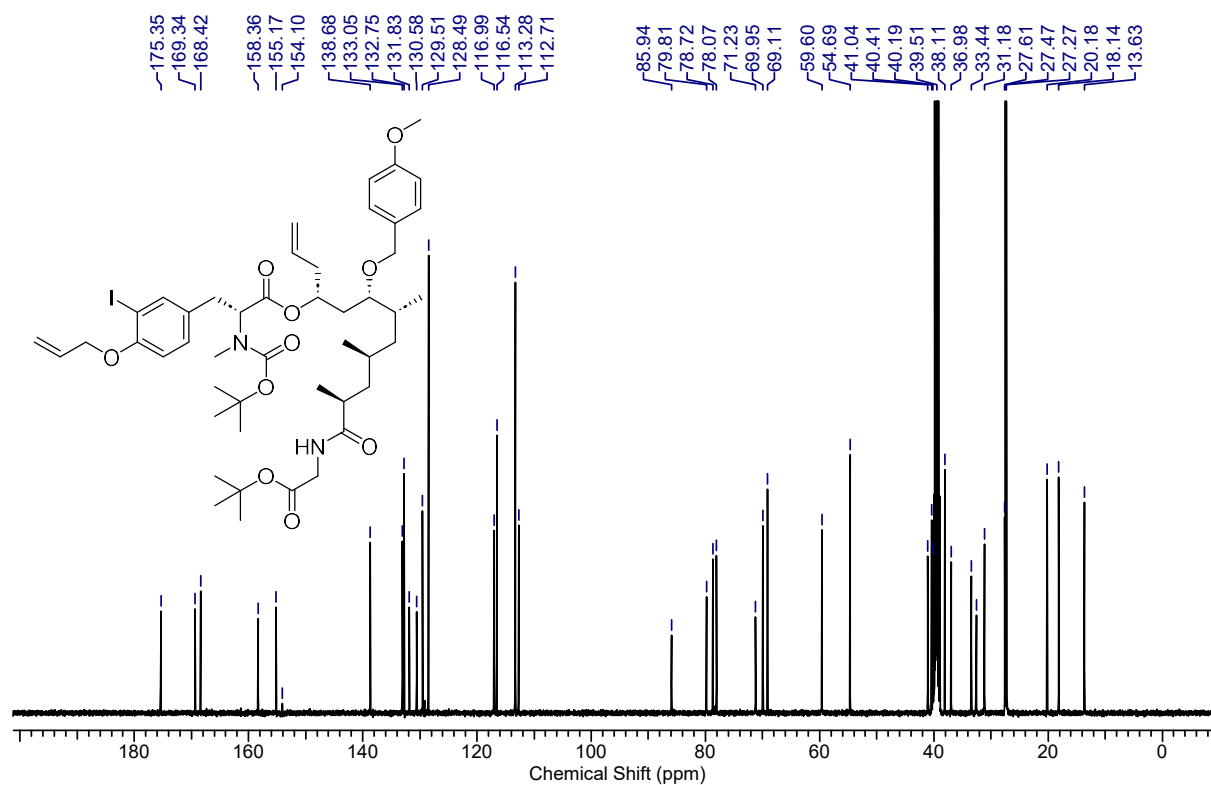

**(3*R*,9*S*,11*S*,13*R*,14*S*,16*R*)-3-[4-(Allyloxy)-3-iodobenzyl]-14-hydroxy-4,9,11,13-tetramethyl-16-[3-(trimethylsilyl)prop-2-yn-1-yl]-1-oxa-4,7-diazacyclohexadecane-2,5,8-trione (7a-1)**

<sup>1</sup>H-NMR (400 MHz, CDCl<sub>3</sub>)

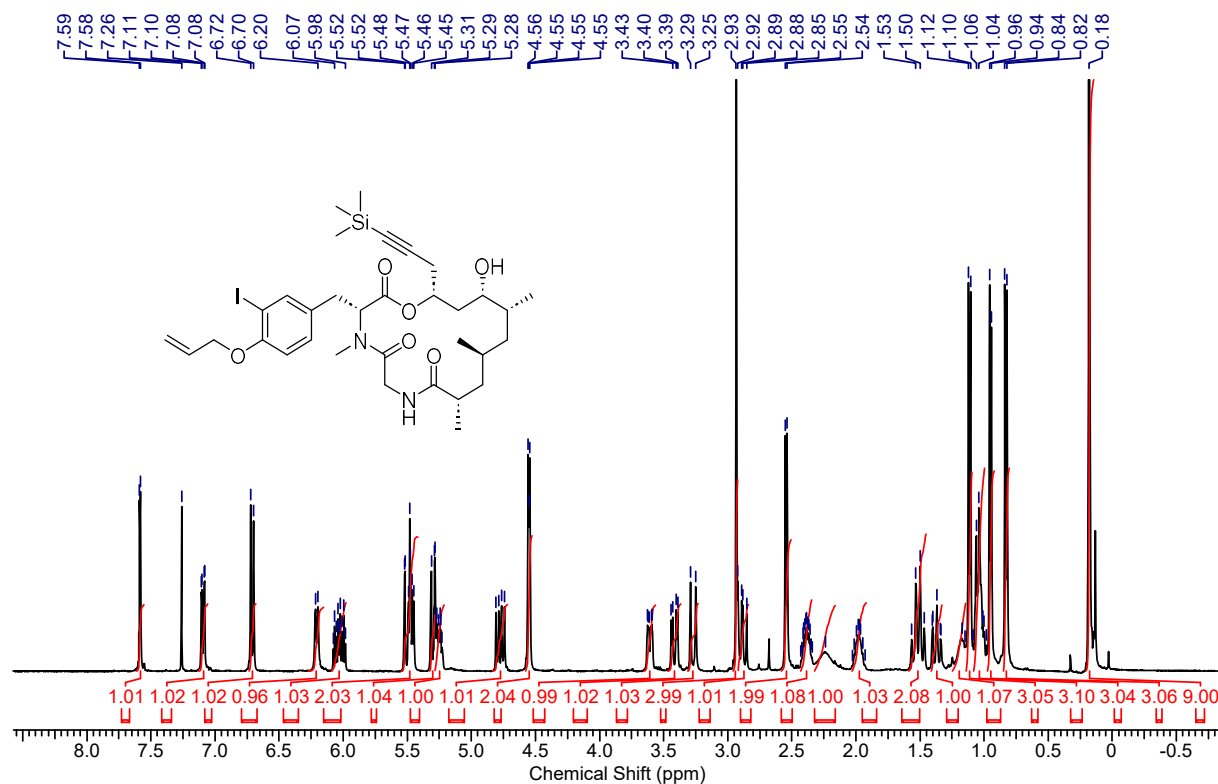

<sup>13</sup>C-NMR (100 MHz, CDCl<sub>3</sub>)

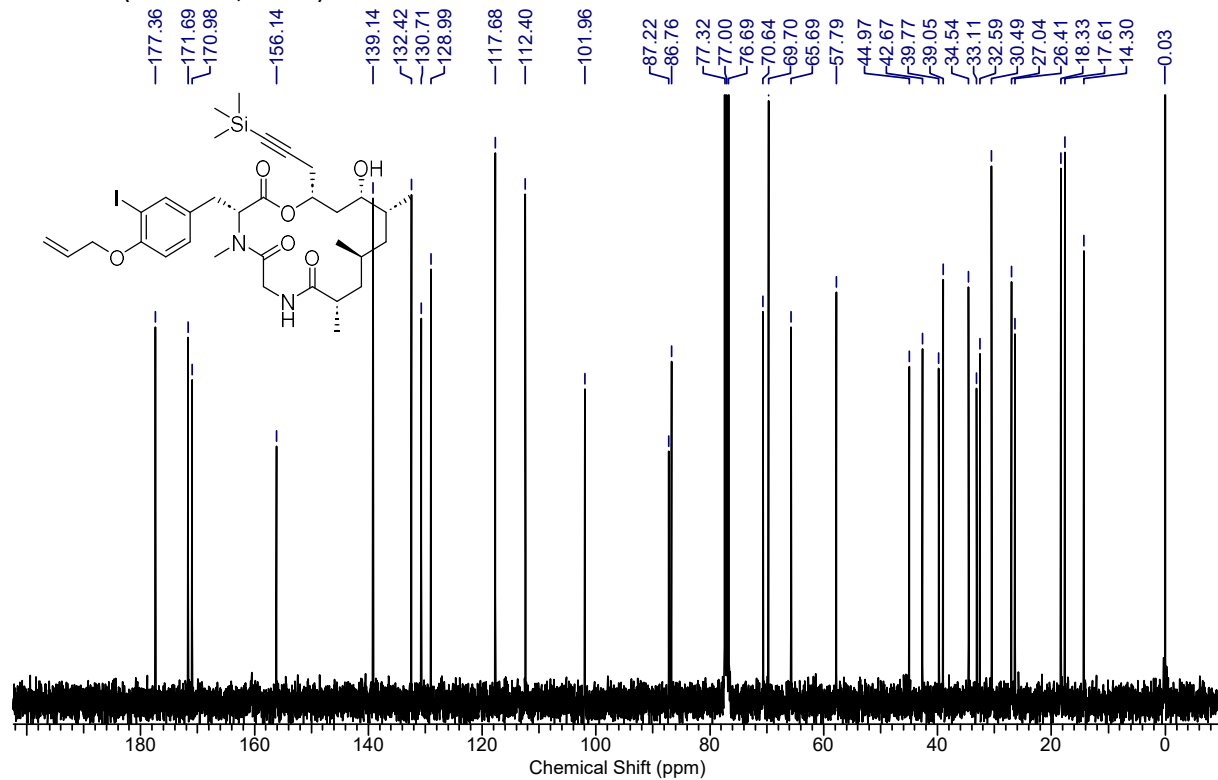



**(3*R*,9*S*,11*S*,13*R*,14*S*,16*R*)-16-allyl-3-[4-(allyloxy)-3-iodobenzyl]-14-hydroxy-4,9,11,13-tetramethyl-1-oxa-4,7-diazacyclohexadecane-2,5,8-trione (7b-1)**

<sup>1</sup>H-NMR (400 MHz, CDCl<sub>3</sub>)

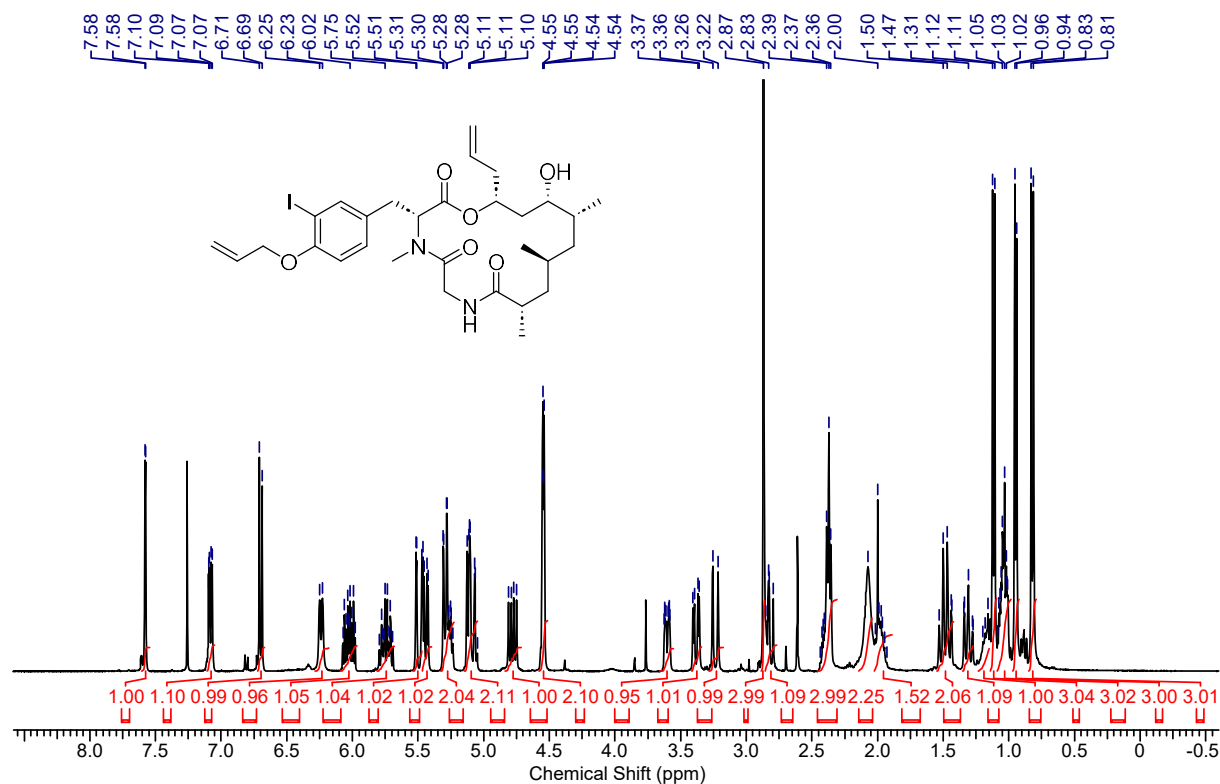

<sup>13</sup>C-NMR (100 MHz, CDCl<sub>3</sub>)

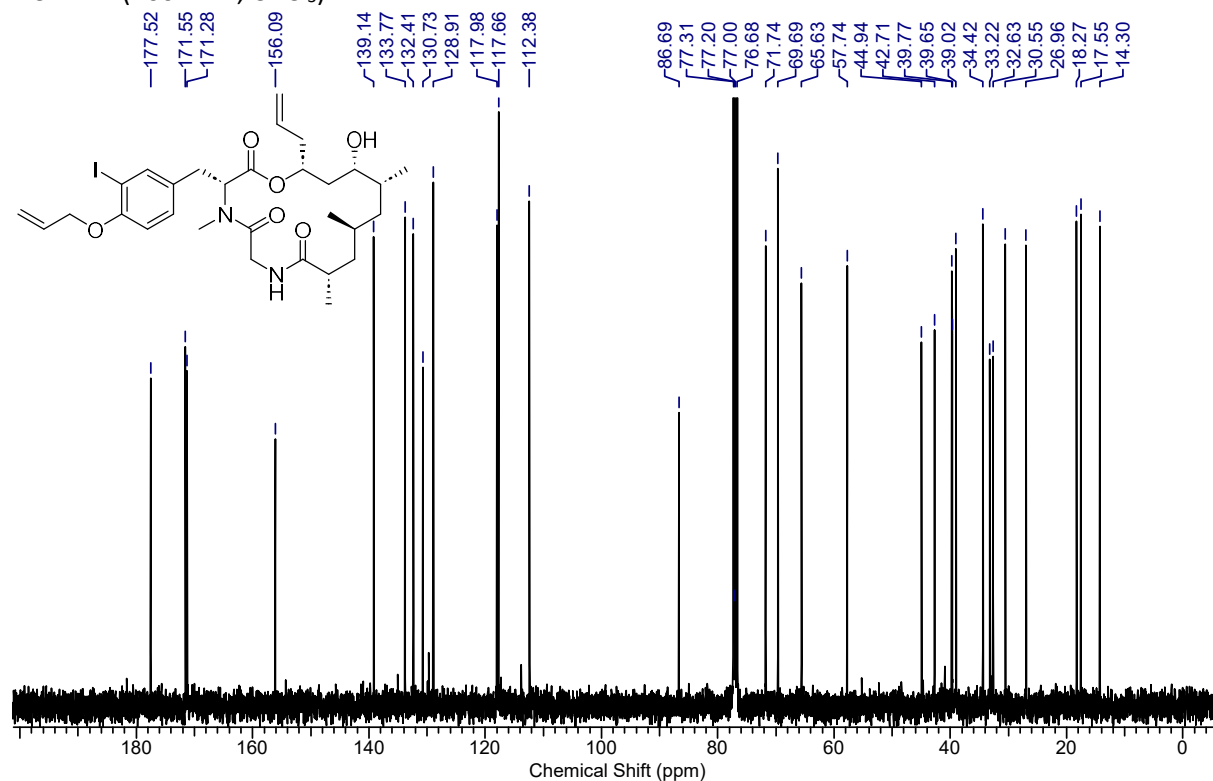

**(3*R*,9*S*,11*S*,13*R*,14*S*,16*R*)-14-Hydroxy-3-(4-hydroxy-3-iodobenzyl)-4,9,11,13-tetramethyl-16-[3-(trimethylsilyl)prop-2-yn-1-yl]-1-oxa-4,7-diazacyclohexadecane-2,5,8-trione (8a)**

<sup>1</sup>H-NMR (400 MHz, CDCl<sub>3</sub>)

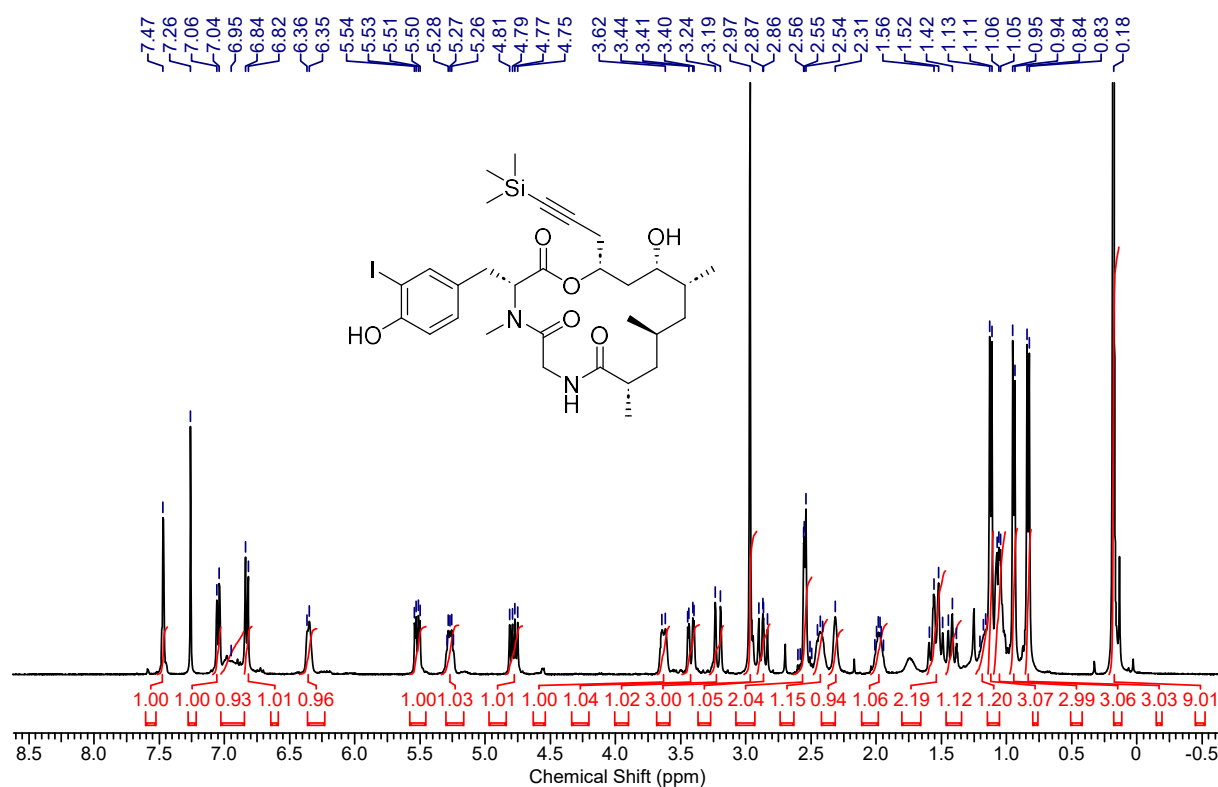

<sup>13</sup>C-NMR (100 MHz, CDCl<sub>3</sub>)

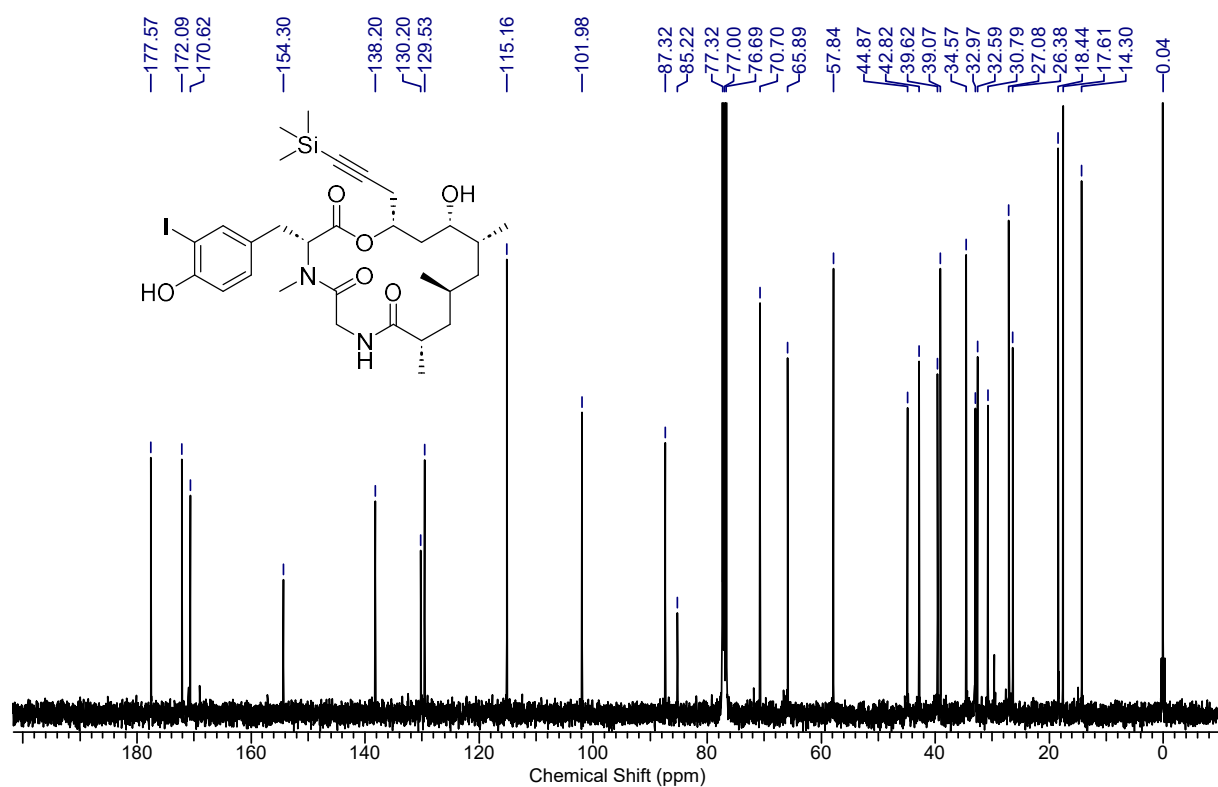

**(3*R*,9*S*,11*S*,13*R*,14*S*,16*R*)-16-Allyl-14-hydroxy-3-(4-hydroxy-3-iodobenzyl)-4,9,11,13-tetramethyl-1-oxa-4,7-diazacyclohexadecane-2,5,8-trione (8b)**

<sup>1</sup>H-NMR (500 MHz, CDCl<sub>3</sub>)

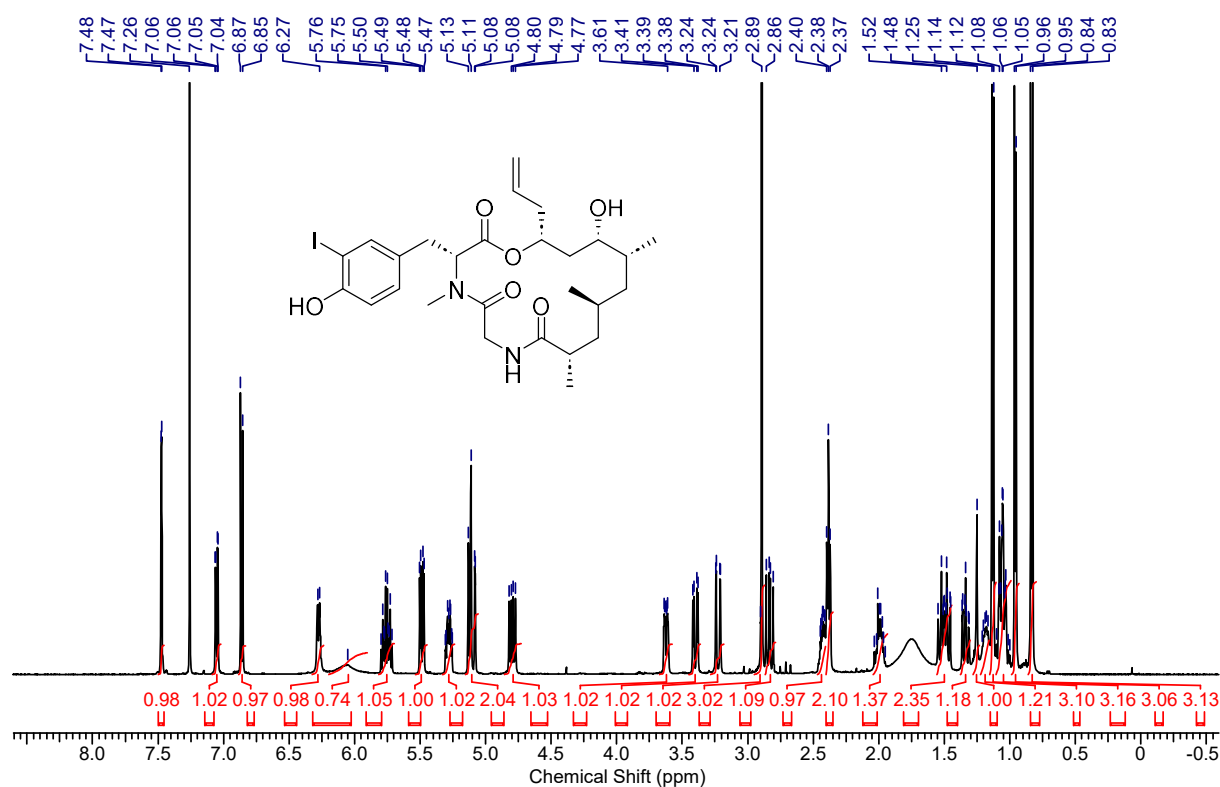

<sup>13</sup>C-NMR (125 MHz, CDCl<sub>3</sub>)

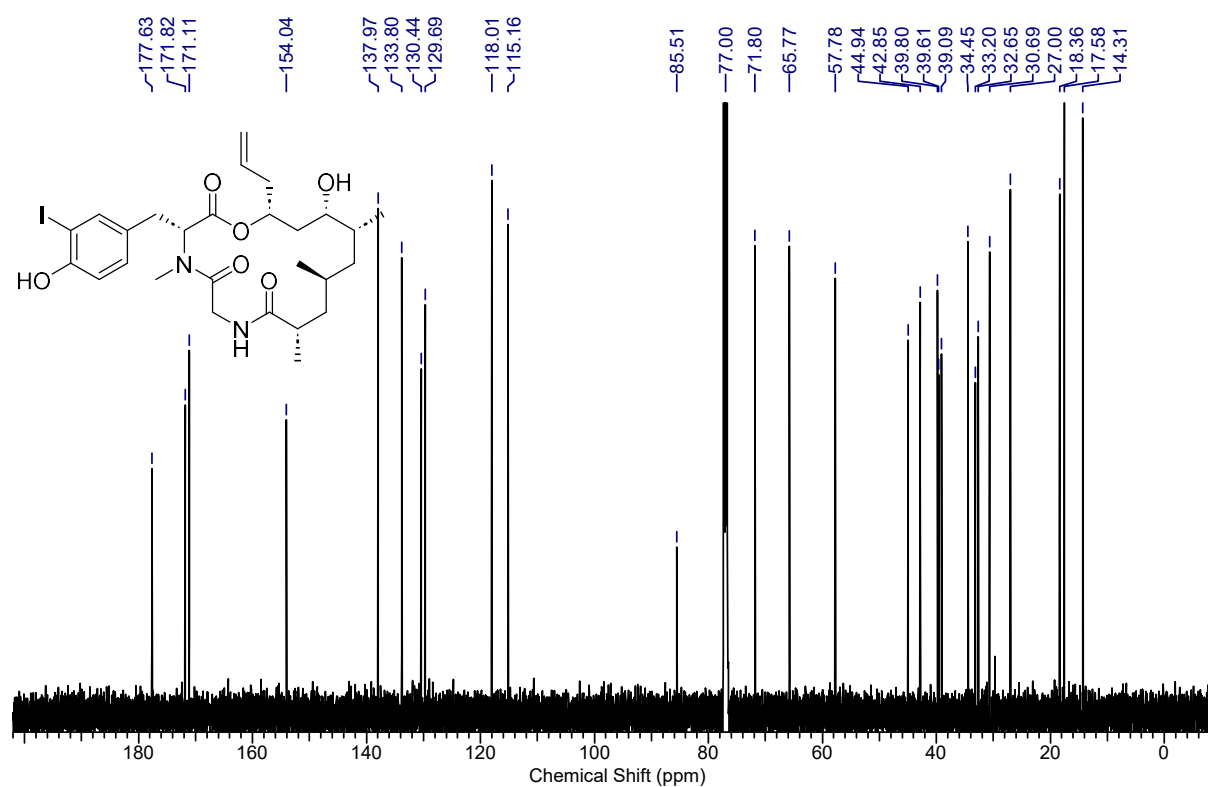

**(3*R*,9*S*,11*S*,13*R*,14*S*,16*R*)-14-Hydroxy-3-(4-hydroxy-3-iodobenzyl)-4,9,11,13-tetramethyl-16-(prop-2-yn-1-yl)-1-oxa-4,7-diazacyclohexadecane-2,5,8-trione (8c)**

<sup>1</sup>H-NMR (500 MHz, CDCl<sub>3</sub>)

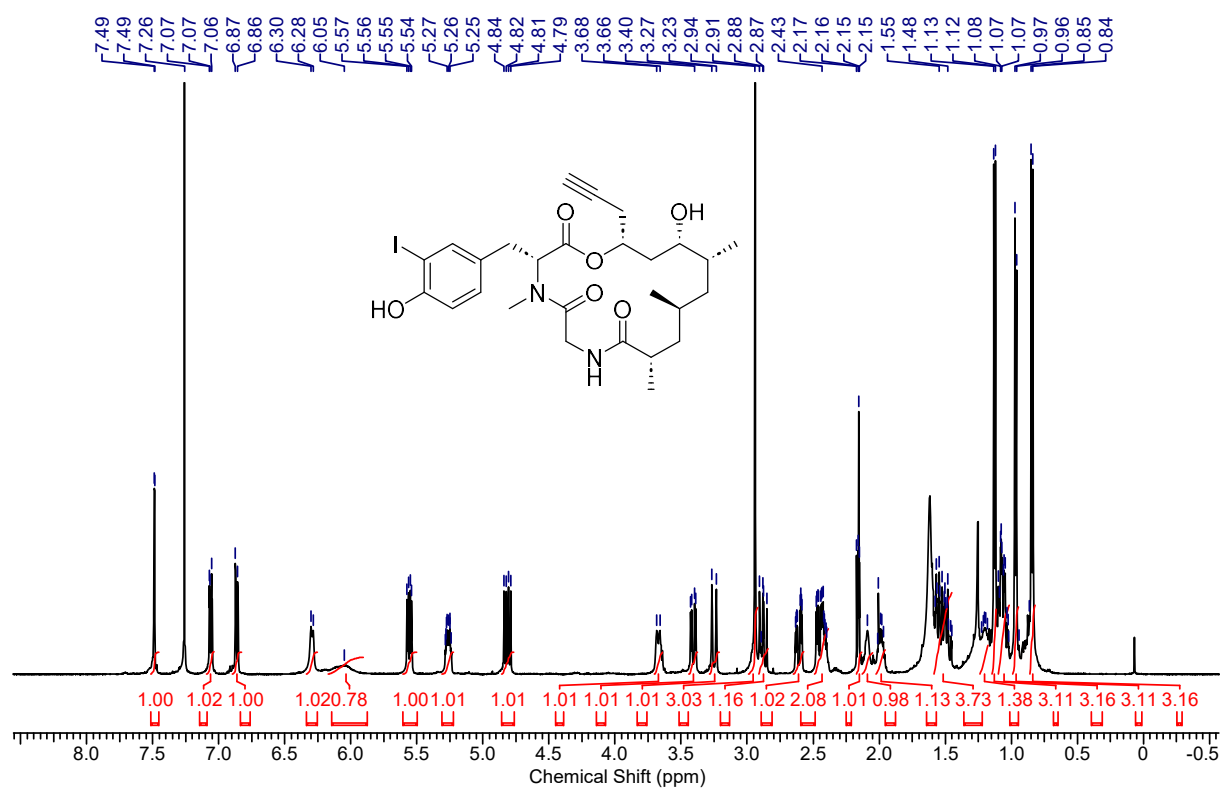

<sup>13</sup>C-NMR (125 MHz, CDCl<sub>3</sub>)

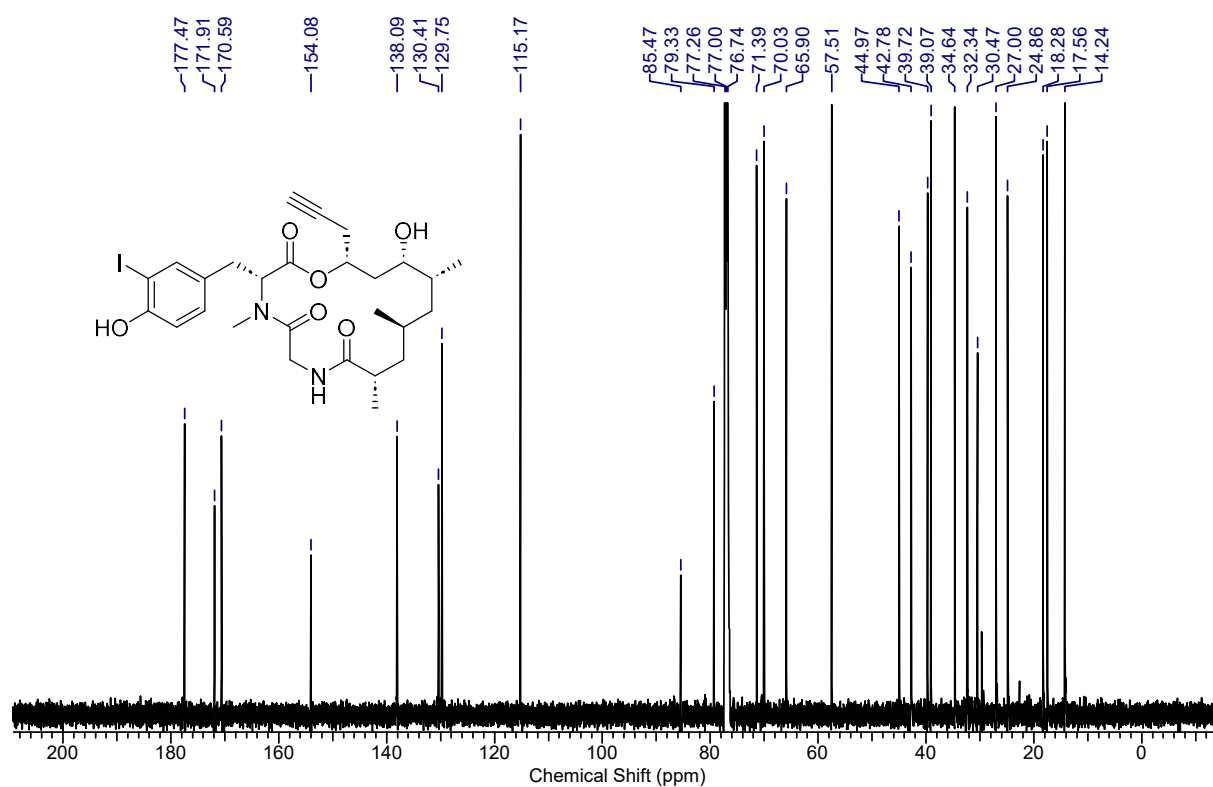

**(3*R*,9*S*,11*S*,13*R*,14*S*,16*R*)-16-[(1-Benzyl-1*H*-1,2,3-triazol-4-yl)methyl]-14-hydroxy-3-(4-hydroxy-3-iodobenzyl)-4,9,11,13-tetramethyl-1-oxa-4,7-diazacyclohexadecane-2,5,8-trione (9a)**

<sup>1</sup>H-NMR (500 MHz, CDCl<sub>3</sub>)

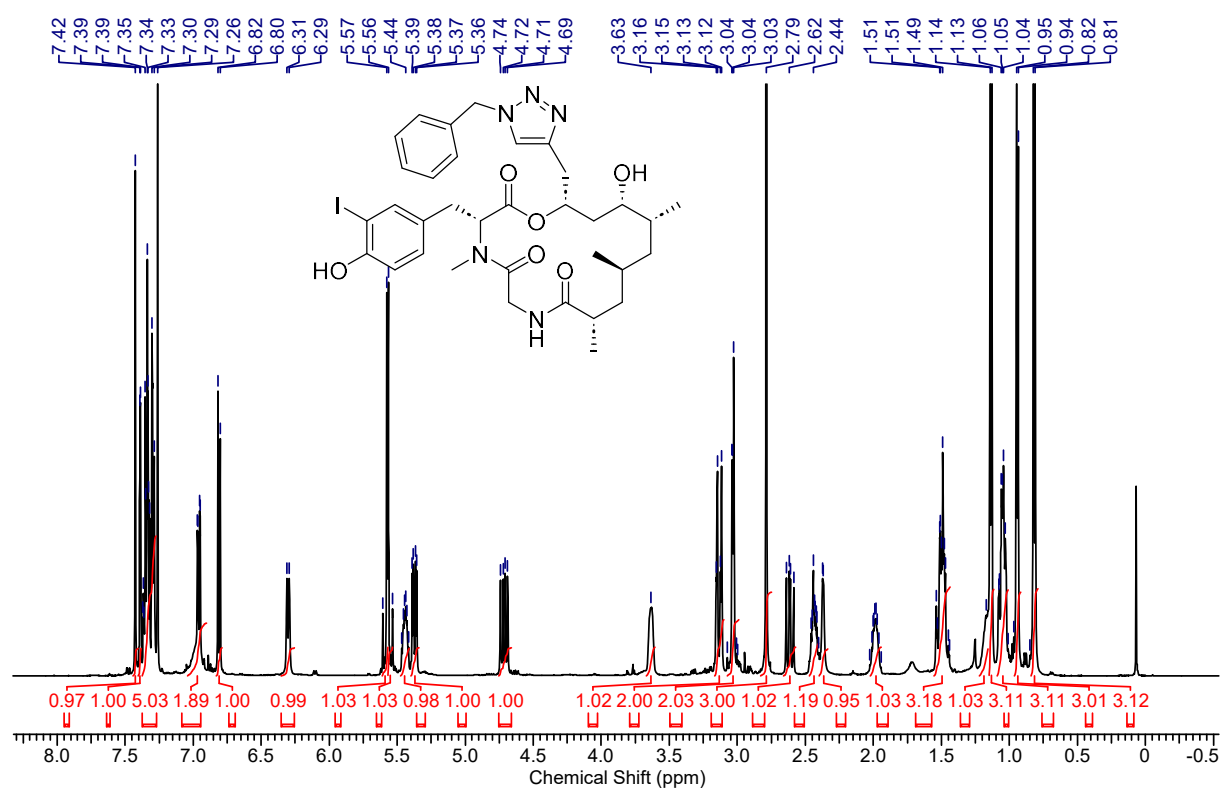

<sup>13</sup>C-NMR (125 MHz, CDCl<sub>3</sub>)

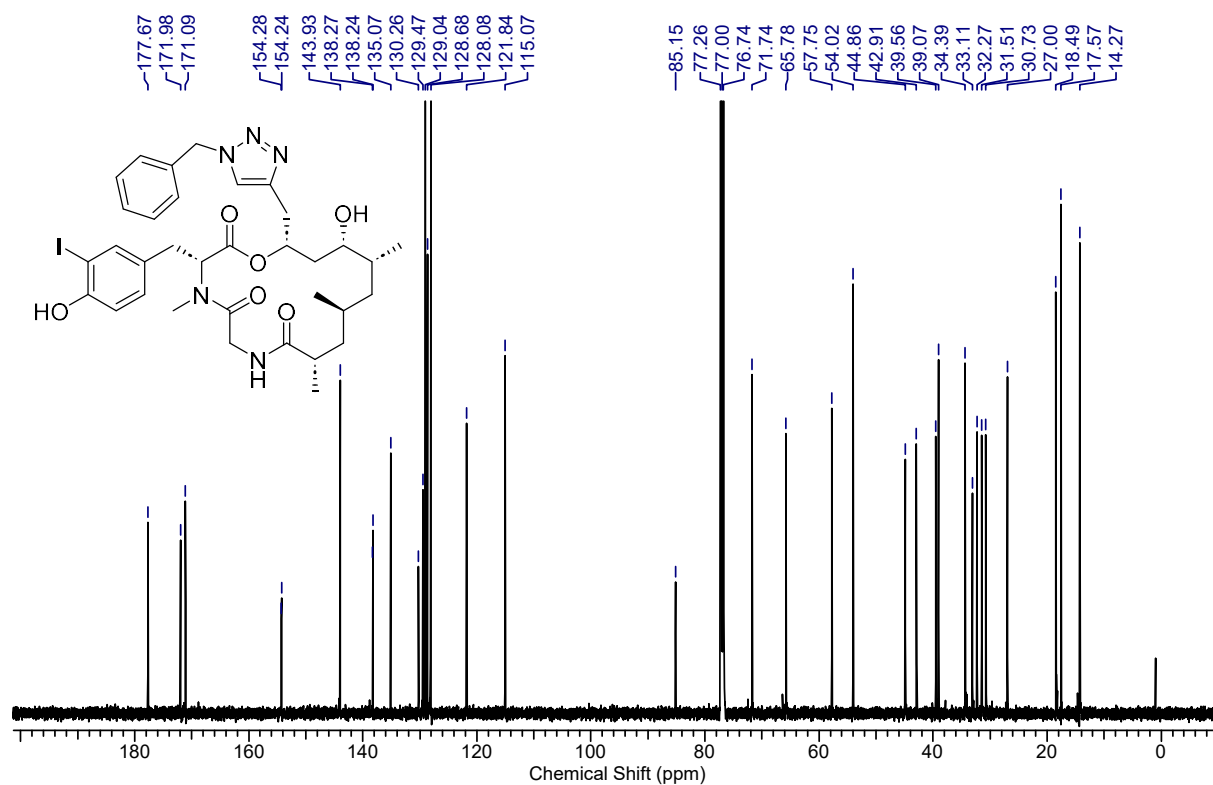

**(3*R*,9*S*,11*S*,13*R*,14*S*,16*R*)-14-hydroxy-3-(4-hydroxy-3-iodobenzyl)-4,9,11,13-tetramethyl-16-((1-pentyl-1*H*-1,2,3-triazol-4-yl)methyl)-1-oxa-4,7-diazacyclohexadecane-2,5,8-trione (9b)**

<sup>1</sup>H-NMR (500 MHz, CDCl<sub>3</sub>)

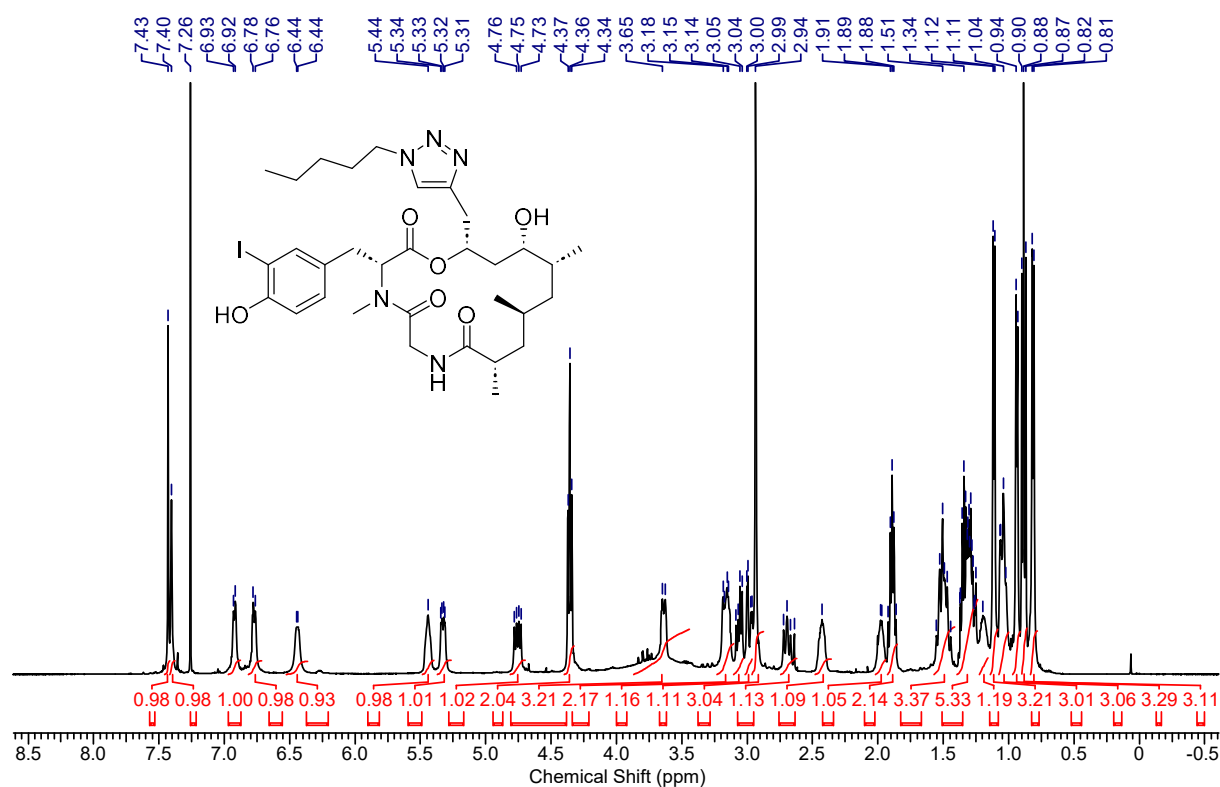

<sup>13</sup>C-NMR (125 MHz, CDCl<sub>3</sub>)

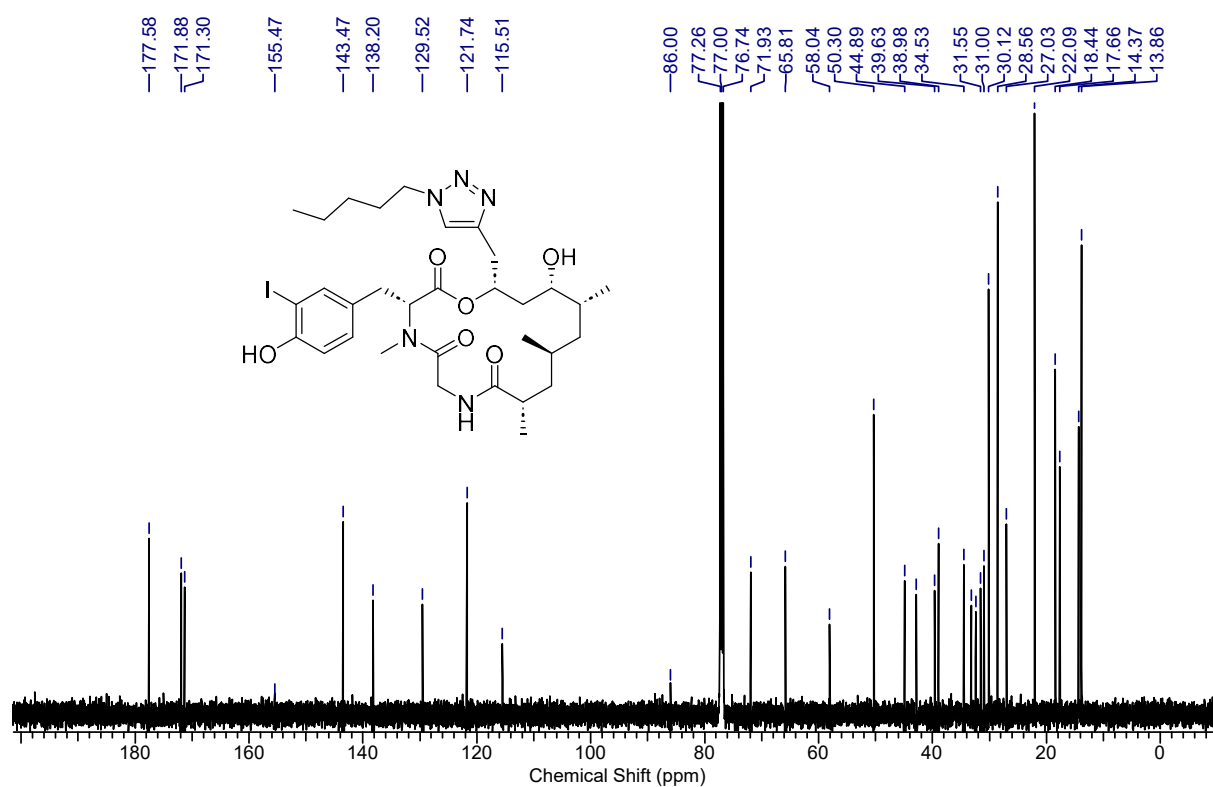

**Benzyl 2-(4-[(*(3R,9S,11S,13R,14S,16R)*-14-hydroxy-3-(4-hydroxy-3-iodobenzyl)-4,9,11,13-tetramethyl-2,5,8-trioxo-1-oxa-4,7-diazacyclohexadecan-16-yl)methyl]-1H-1,2,3-triazol-1-yl)acetate (9c)**

<sup>1</sup>H-NMR (500 MHz, CDCl<sub>3</sub>)

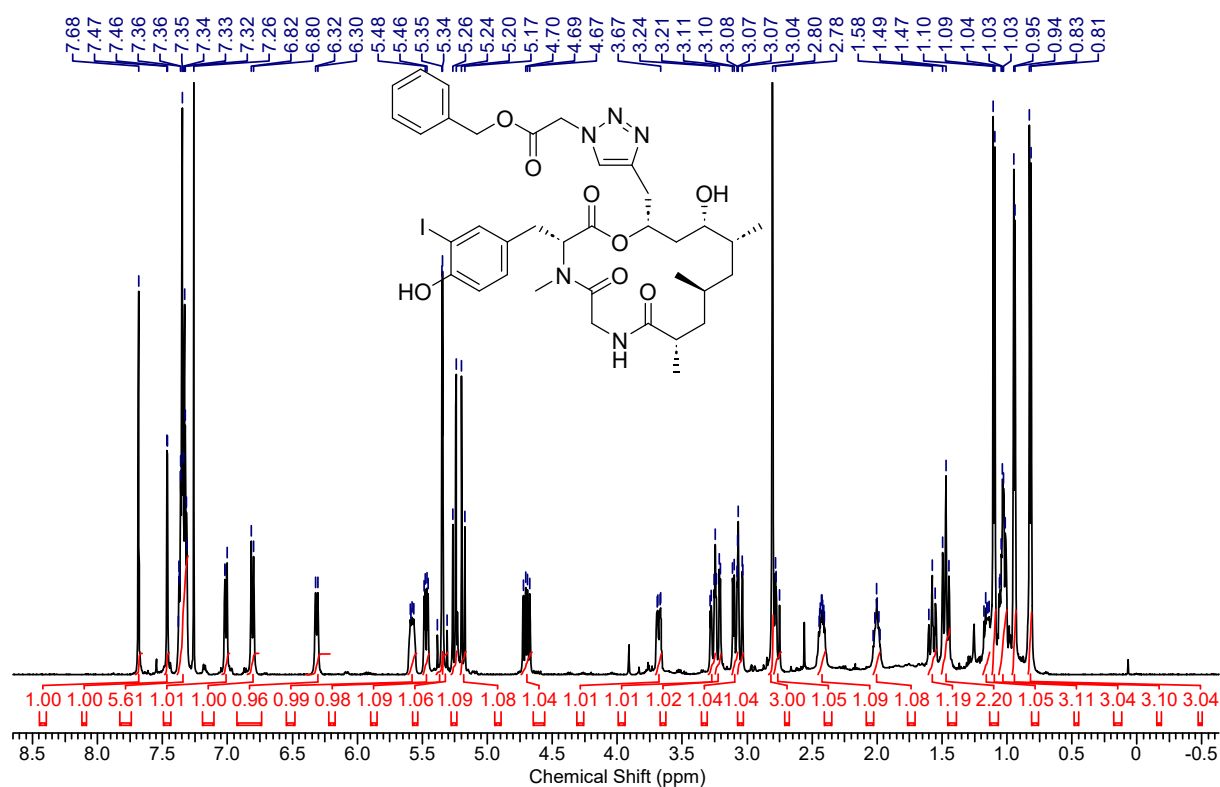

<sup>13</sup>C-NMR (125 MHz, CDCl<sub>3</sub>)

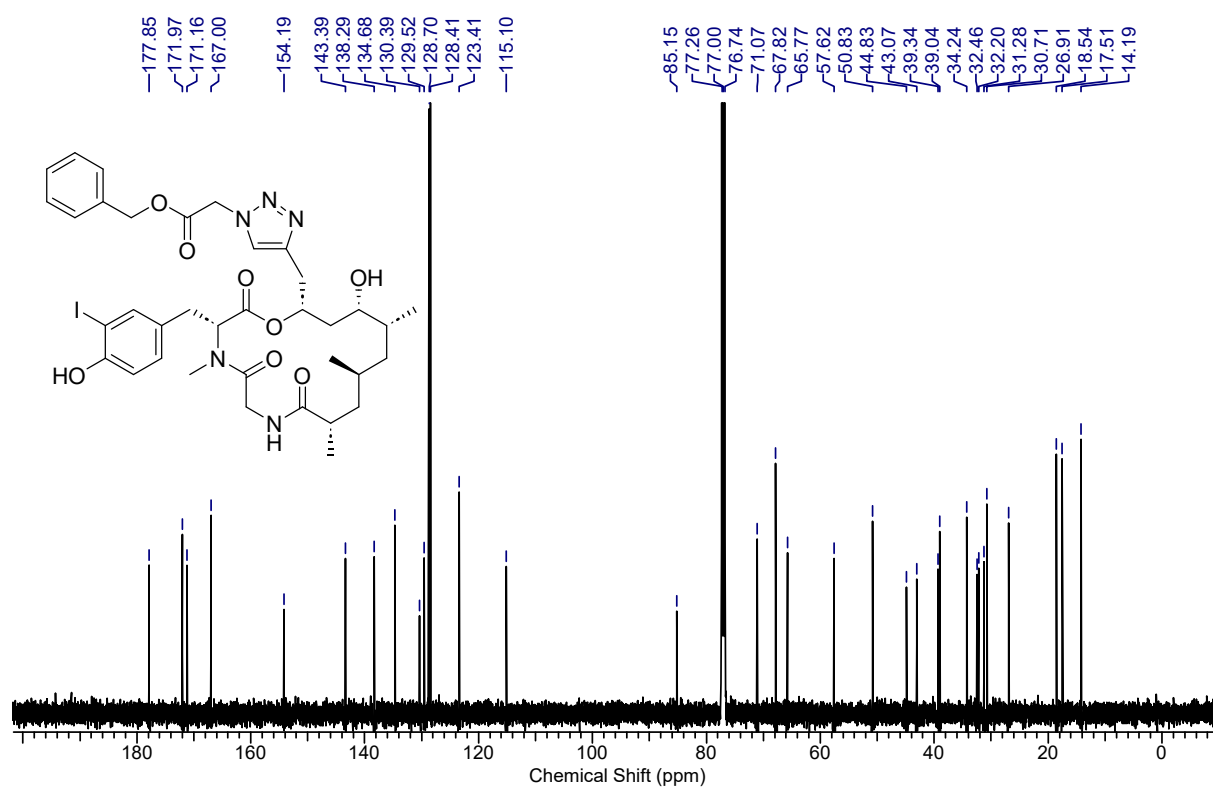

**2-{2-[2-(4-[[[(3*R*,9*S*,11*S*,13*R*,14*S*,16*R*)-14-Hydroxy-3-(4-hydroxy-3-iodobenzyl)-4,9,11,13-tetramethyl-2,5,8-trioxo-1-oxa-4,7-diazacyclohexadecan-16-yl]methyl]-1*H*-1,2,3-triazol-1-yl)ethoxy]acetic acid (9d)**

<sup>1</sup>H-NMR (500 MHz, DMSO-D<sub>6</sub>)

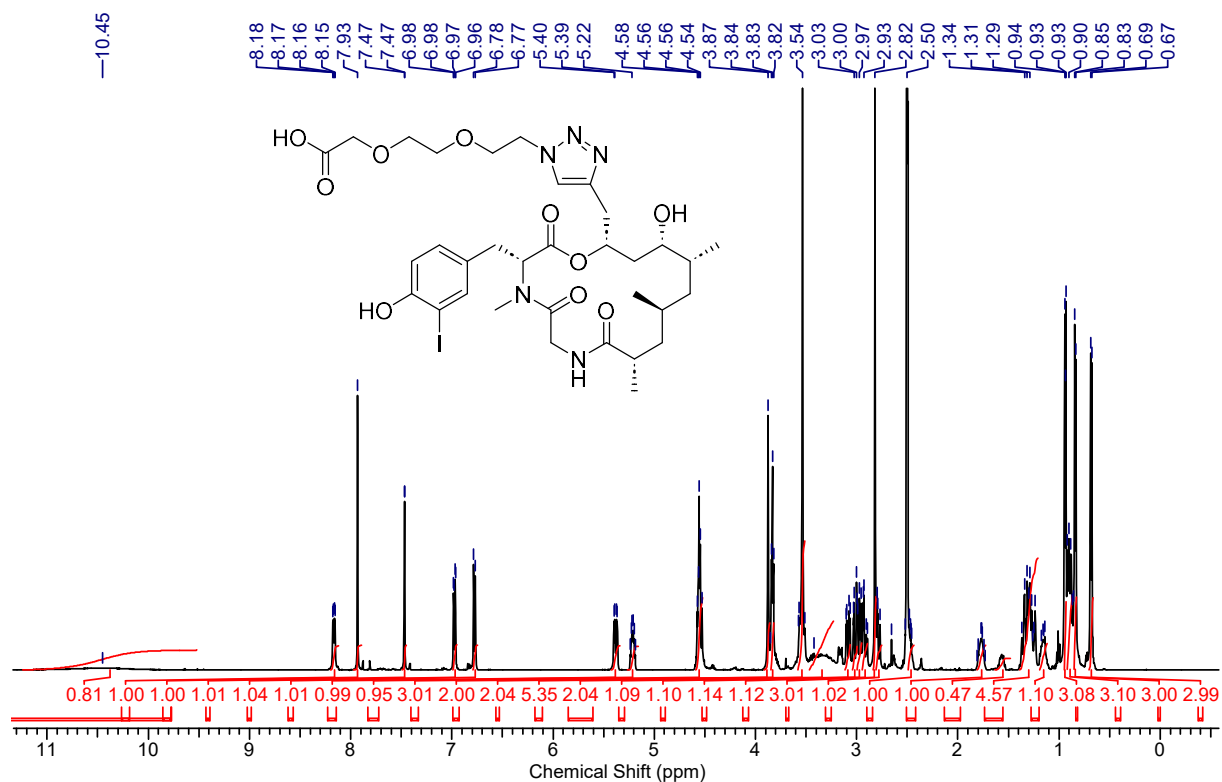

<sup>13</sup>C-NMR (125 MHz, DMSO-D<sub>6</sub>)

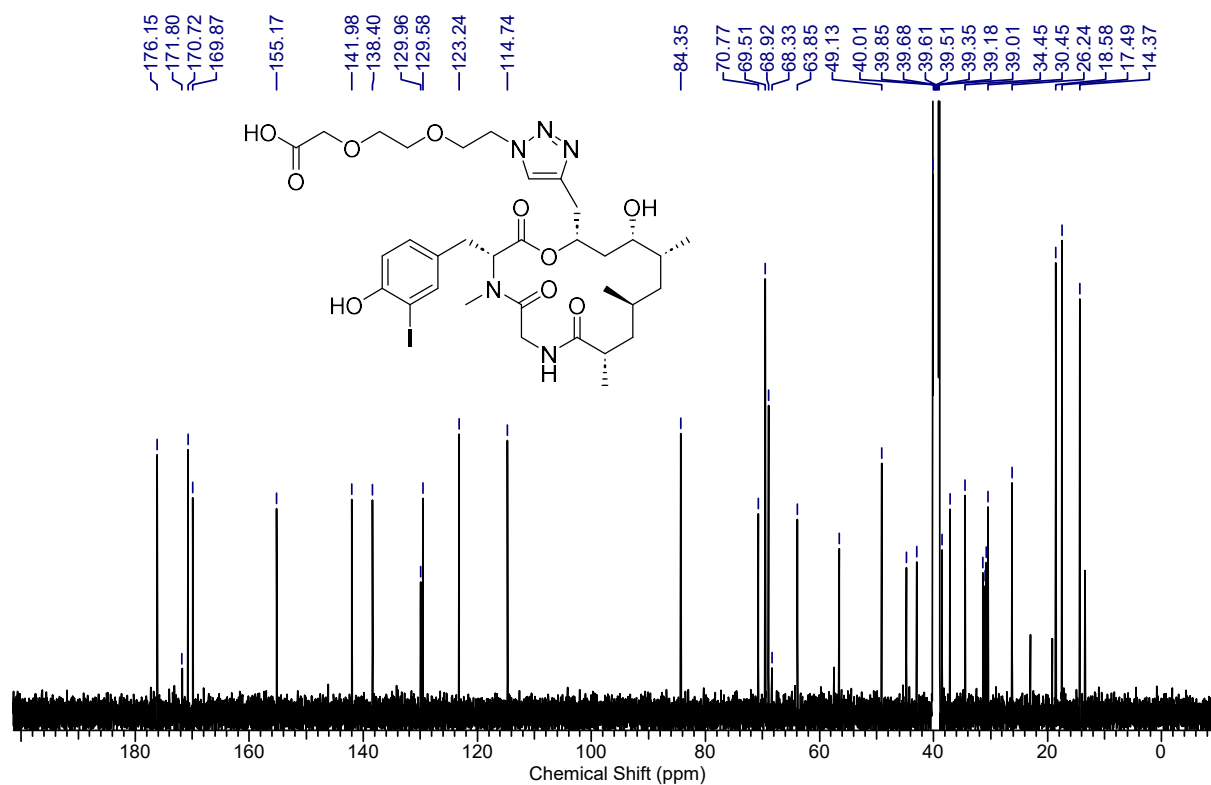



**(3*R*,9*S*,11*S*,13*R*,14*S*,16*R*)-14-Hydroxy-3-(4-hydroxy-3-iodobenzyl)-16-((1-(2-(2-(2-hydroxyethoxy)ethoxy)ethoxy)ethyl)-1*H*-1,2,3-triazol-4-yl)methyl)-4,9,11,13-tetramethyl-1-oxa-4,7-diazacyclohexadecane-2,5,8-trione (9e)**

<sup>1</sup>H-NMR (500 MHz, CDCl<sub>3</sub>)

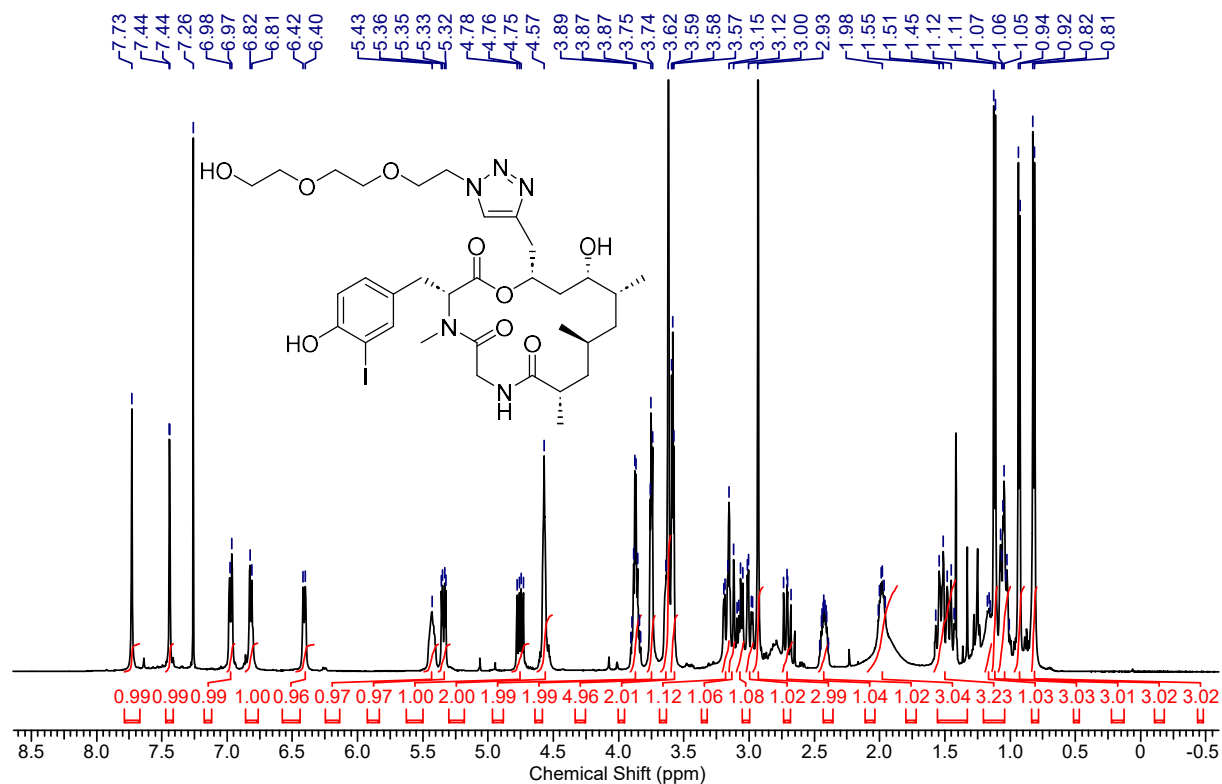

<sup>13</sup>C-NMR (125 MHz, CDCl<sub>3</sub>)

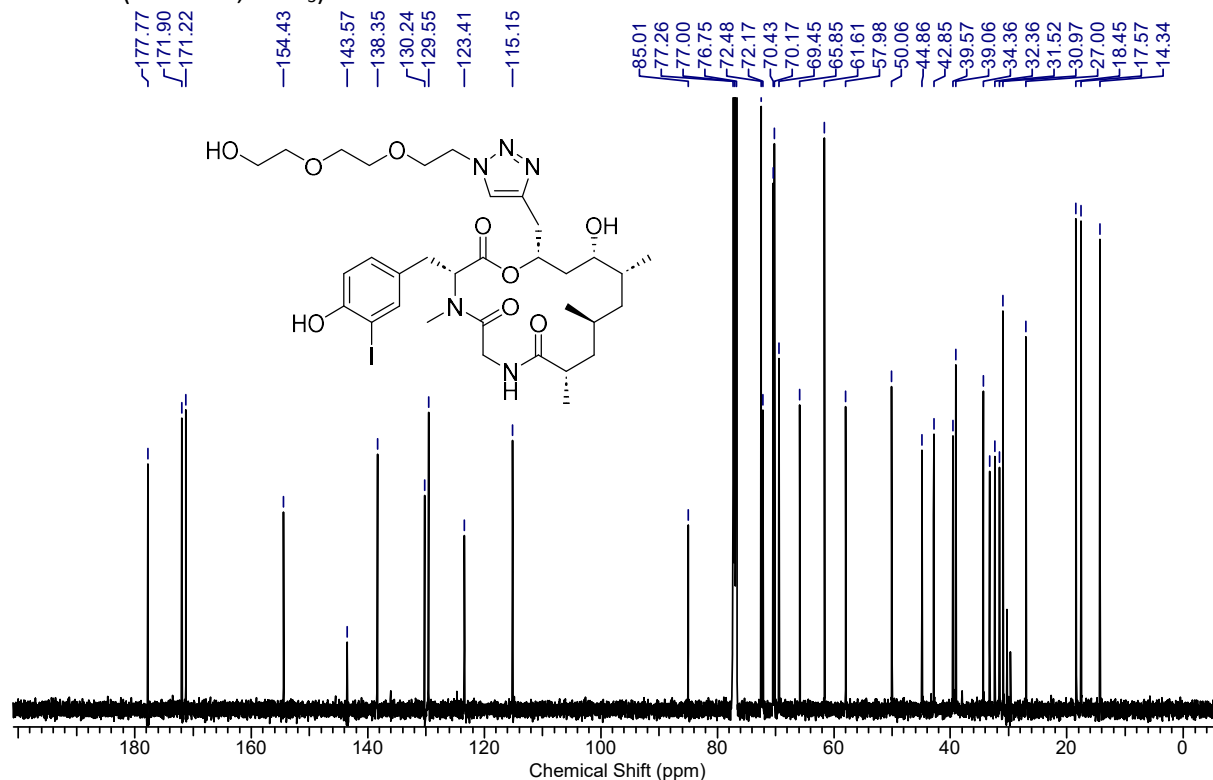

**tert-Butyl (2-{2-[2-(4-{[(3*R*,9*S*,11*S*,13*R*,14*S*,16*R*)-14-hydroxy-3-(4-hydroxy-3-iodobenzyl)-4,9,11,13-tetramethyl-2,5,8-trioxo-1-oxa-4,7-diazacyclohexadecan-16-yl]methyl}-1*H*-1,2,3-triazol-1-yl)ethoxy]ethoxy}ethyl)carbamate (9f)**

<sup>1</sup>H-NMR (500 MHz, DMSO-D<sub>6</sub>)

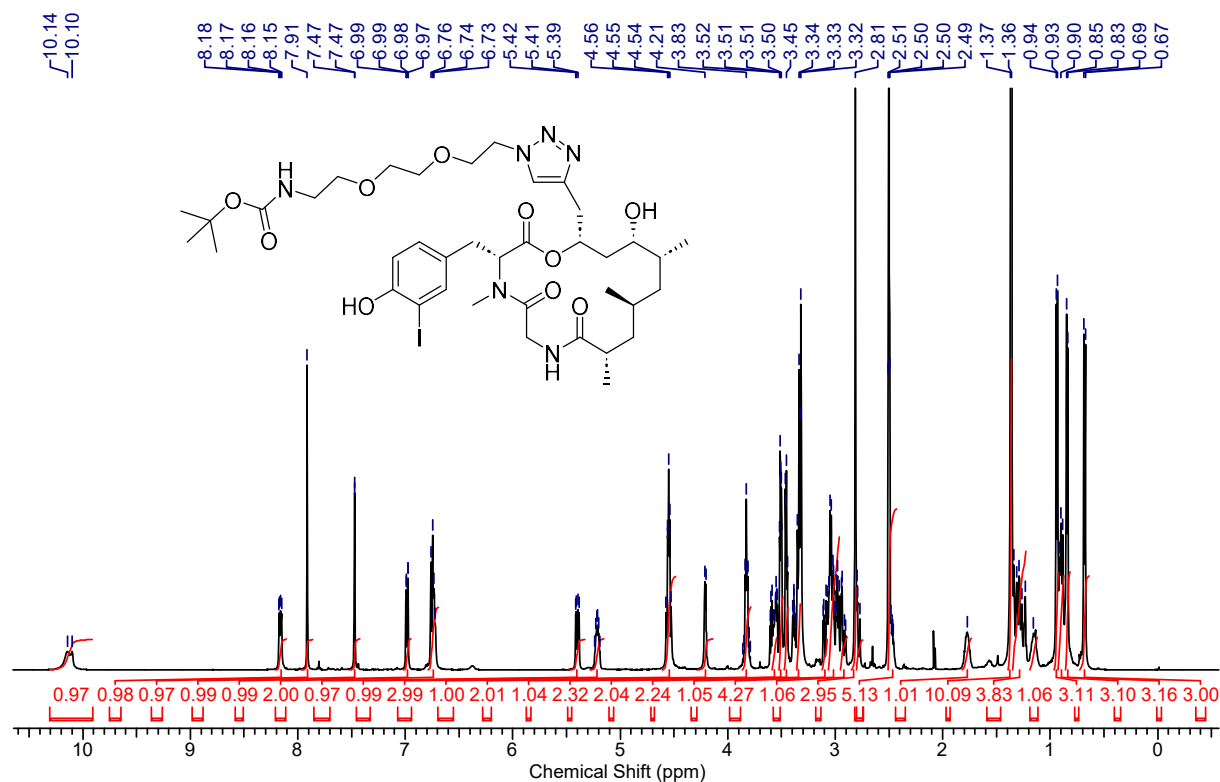

<sup>13</sup>C-NMR (125 MHz, DMSO-D<sub>6</sub>)

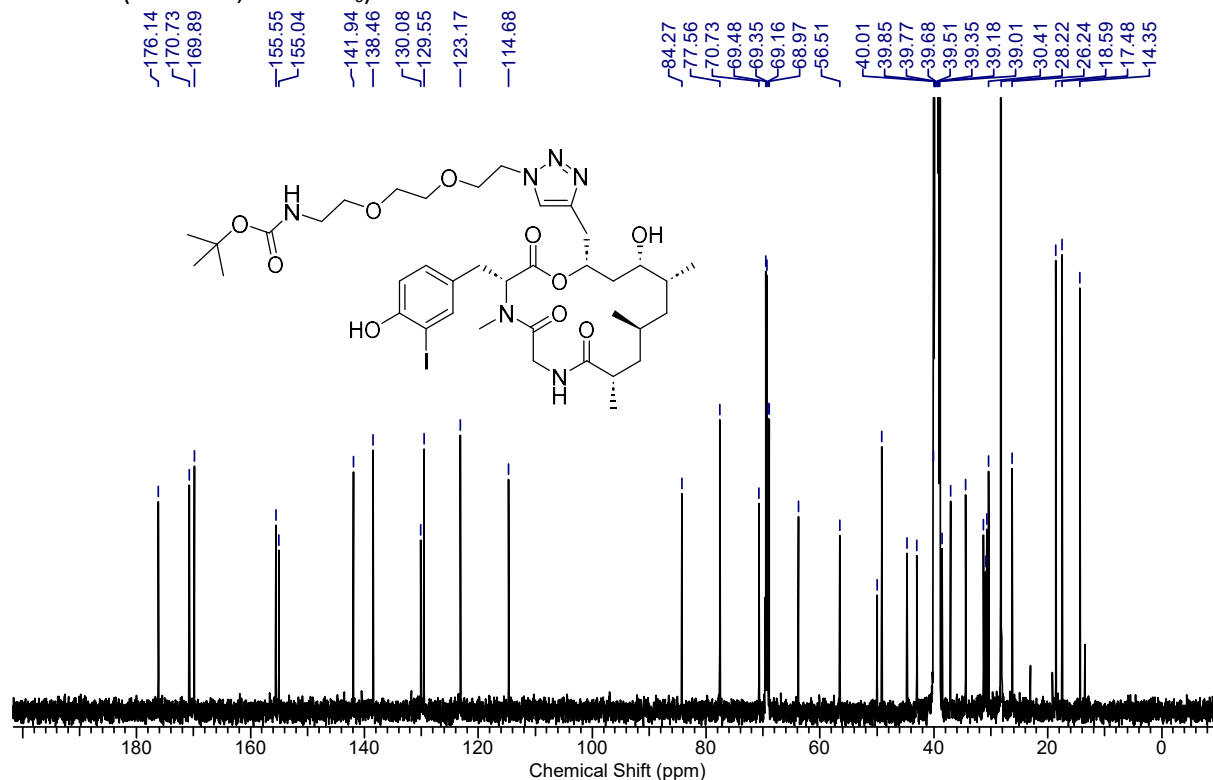

***tert*-Butyl [2-(2-{2-[2-(4-{[(3*R*,9*S*,11*S*,13*R*,14*S*,16*R*)-14-hydroxy-3-(4-hydroxy-3-iodobenzyl)-4,9,11,13-tetramethyl-2,5,8-trioxo-1-oxa-4,7-diazacyclohexadecan-16-yl)methyl}-1*H*-1,2,3-triazol-1-yl)ethoxy]ethoxy}ethoxy)ethyl]carbamate (9g)**

<sup>1</sup>H-NMR (500 MHz, DMSO-D<sub>6</sub>)

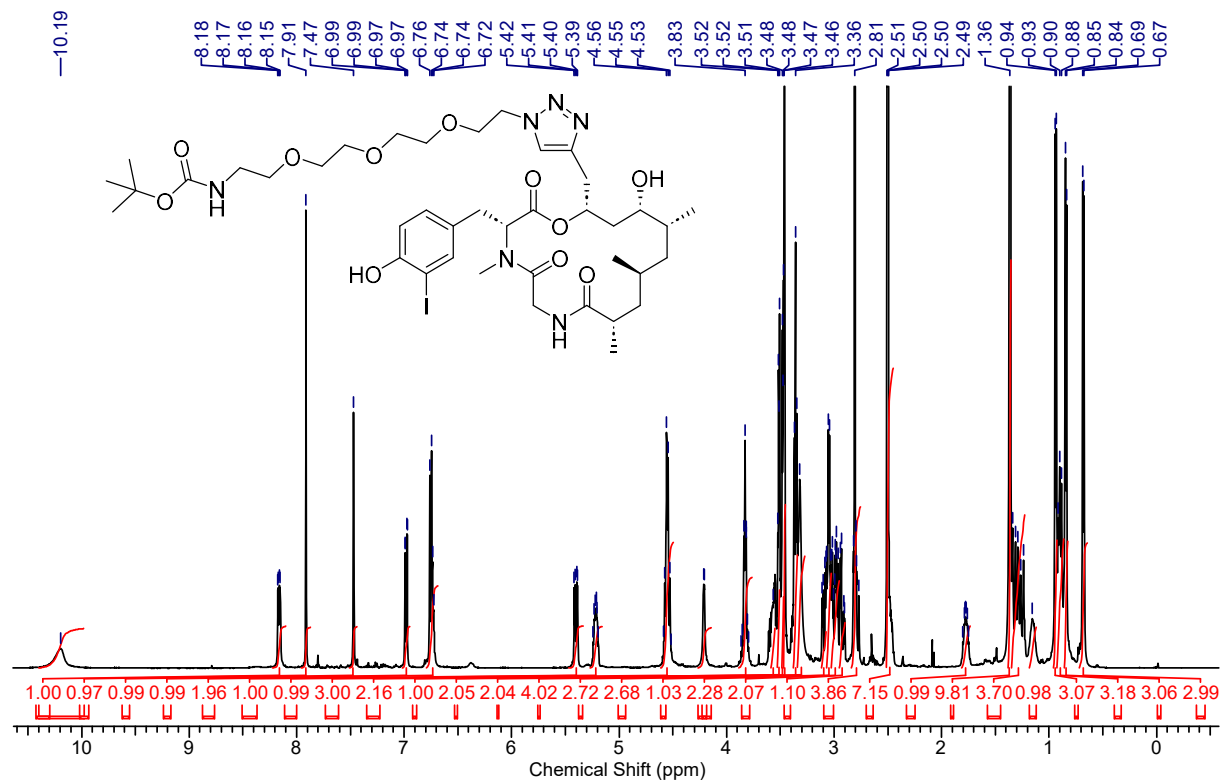

<sup>13</sup>C-NMR (125 MHz, DMSO-D<sub>6</sub>)

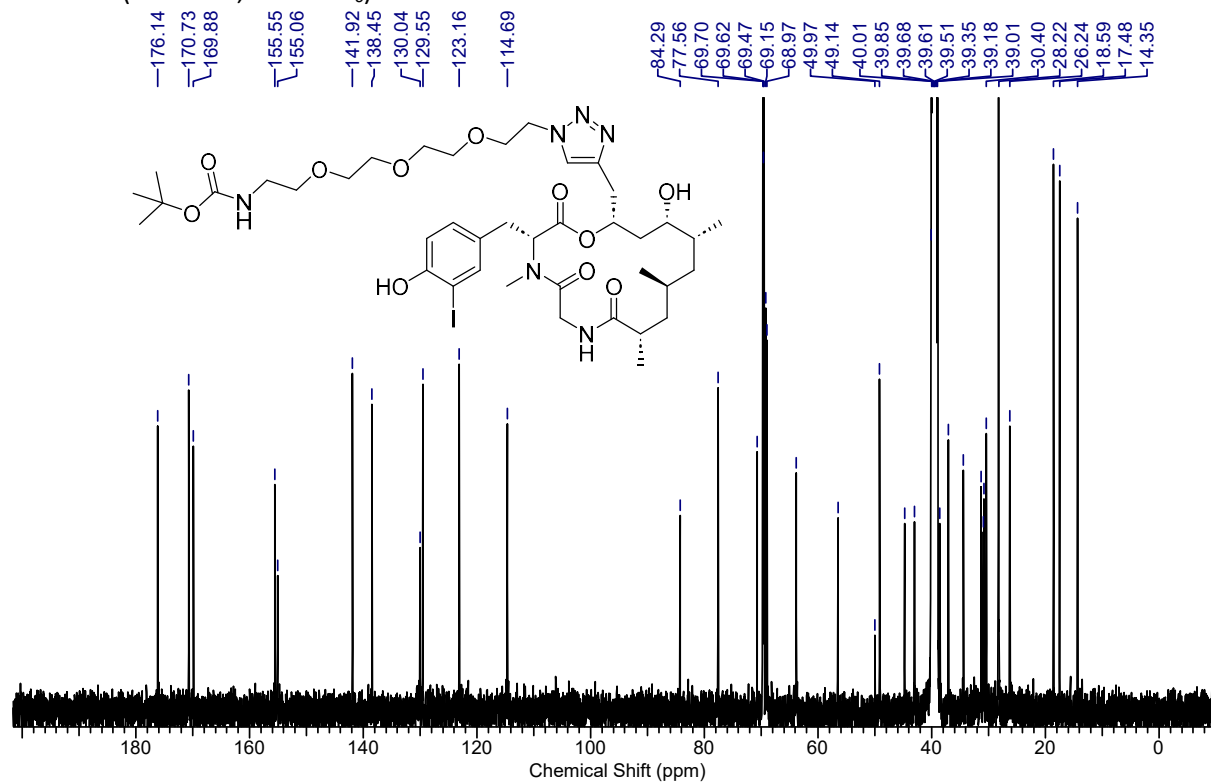

**(3*R*,9*S*,11*S*,13*R*,14*S*,16*R*)-14-Hydroxy-3-(4-hydroxy-3-iodobenzyl)-4,9,11,13-tetramethyl-16-(3-phenylprop-2-yn-1-yl)-1-oxa-4,7-diazacyclohexadecane-2,5,8-trione (10a)**

<sup>1</sup>H-NMR (500 MHz, CDCl<sub>3</sub>)

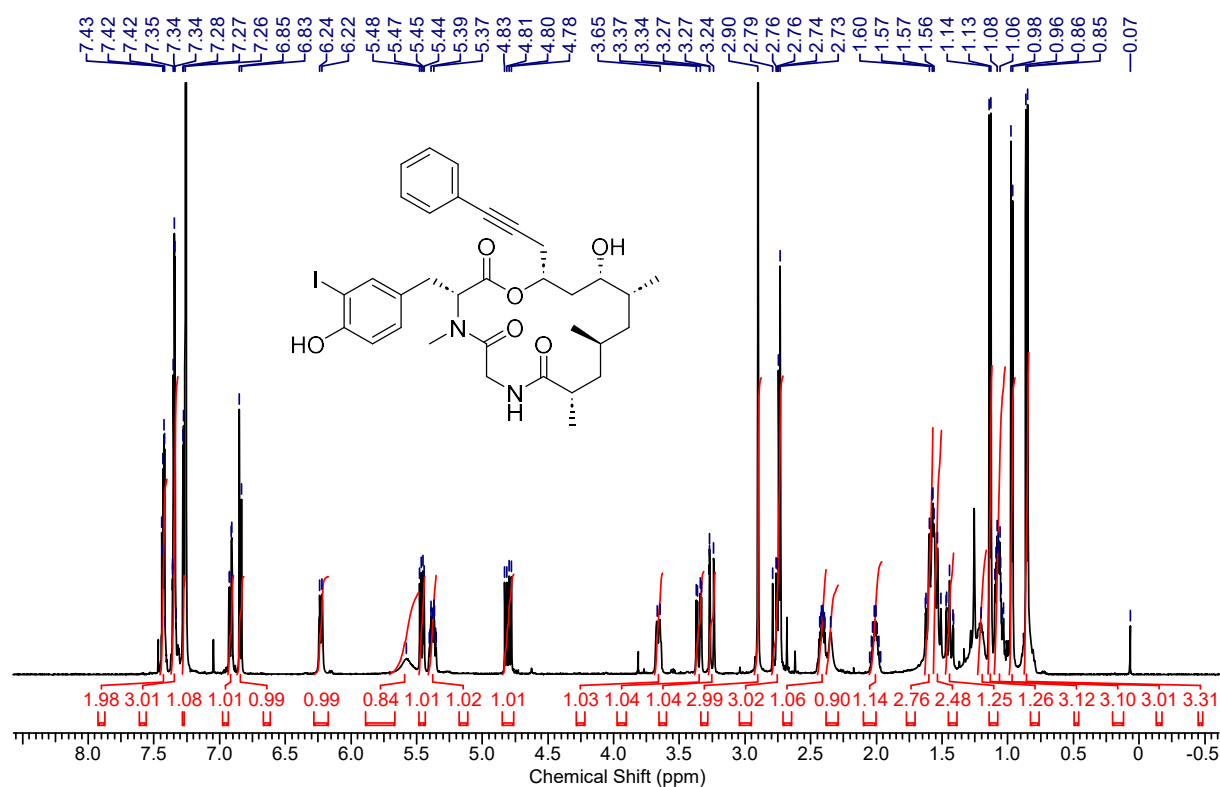

<sup>13</sup>C-NMR (125 MHz, CDCl<sub>3</sub>)

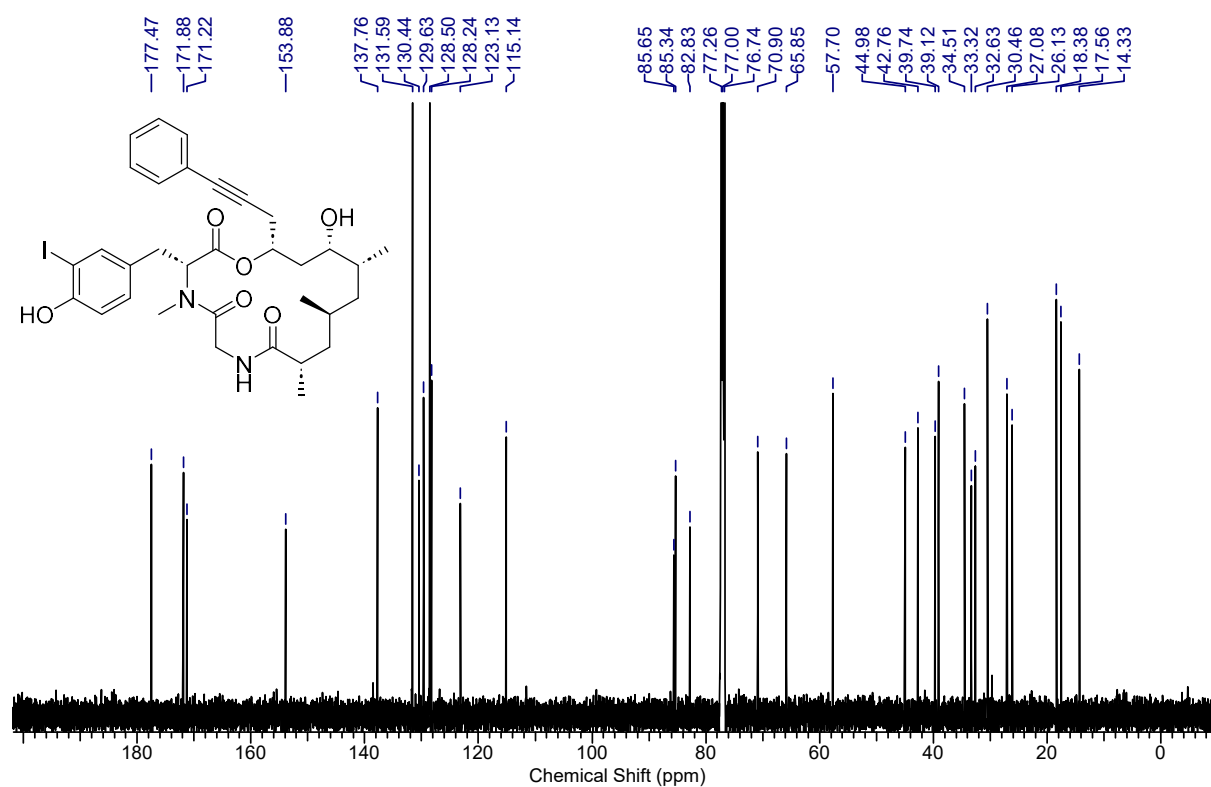

**(3*R*,9*S*,11*S*,13*R*,14*S*,16*R*)-14-Hydroxy-3-(4-hydroxy-3-iodobenzyl)-16-[3-(4-methoxyphenyl)prop-2-yn-1-yl]-4,9,11,13-tetramethyl-1-oxa-4,7-diazacyclohexadecane-2,5,8-trione (10b)**

<sup>1</sup>H-NMR (500 MHz, CDCl<sub>3</sub>)

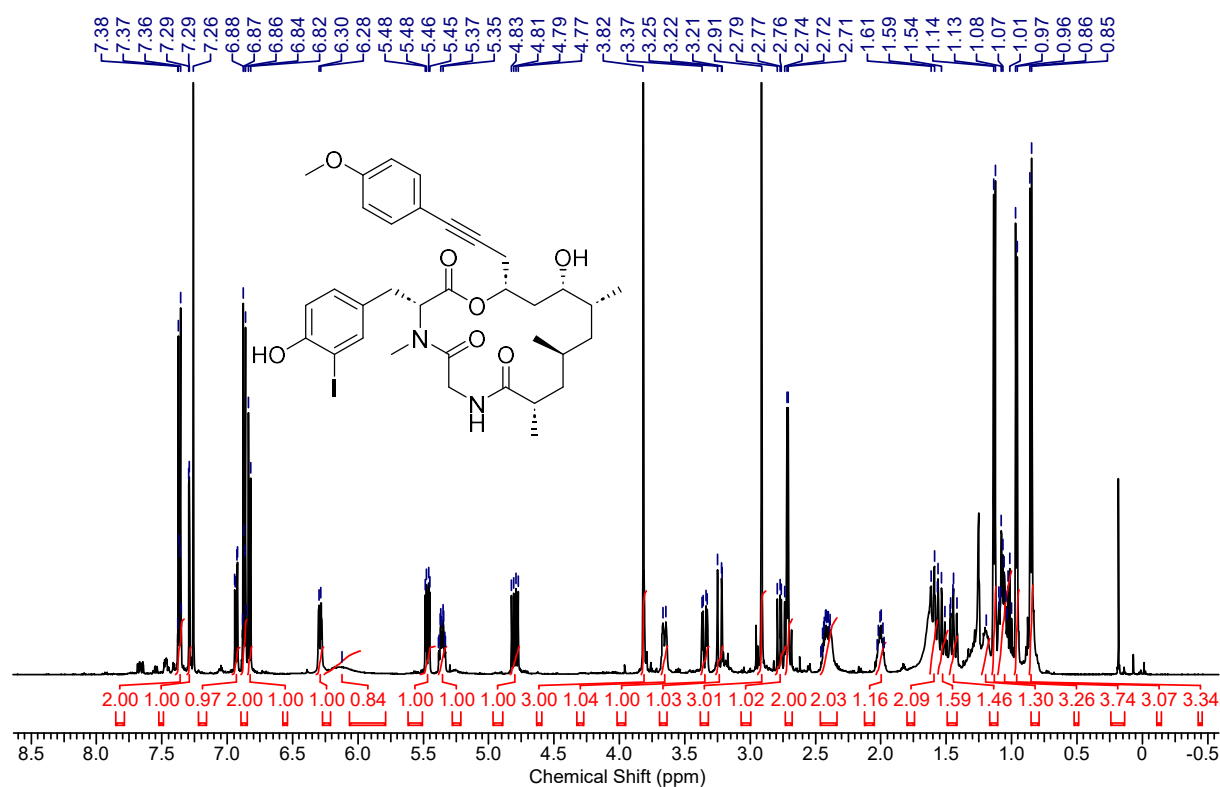

<sup>13</sup>C-NMR (125 MHz, CDCl<sub>3</sub>)

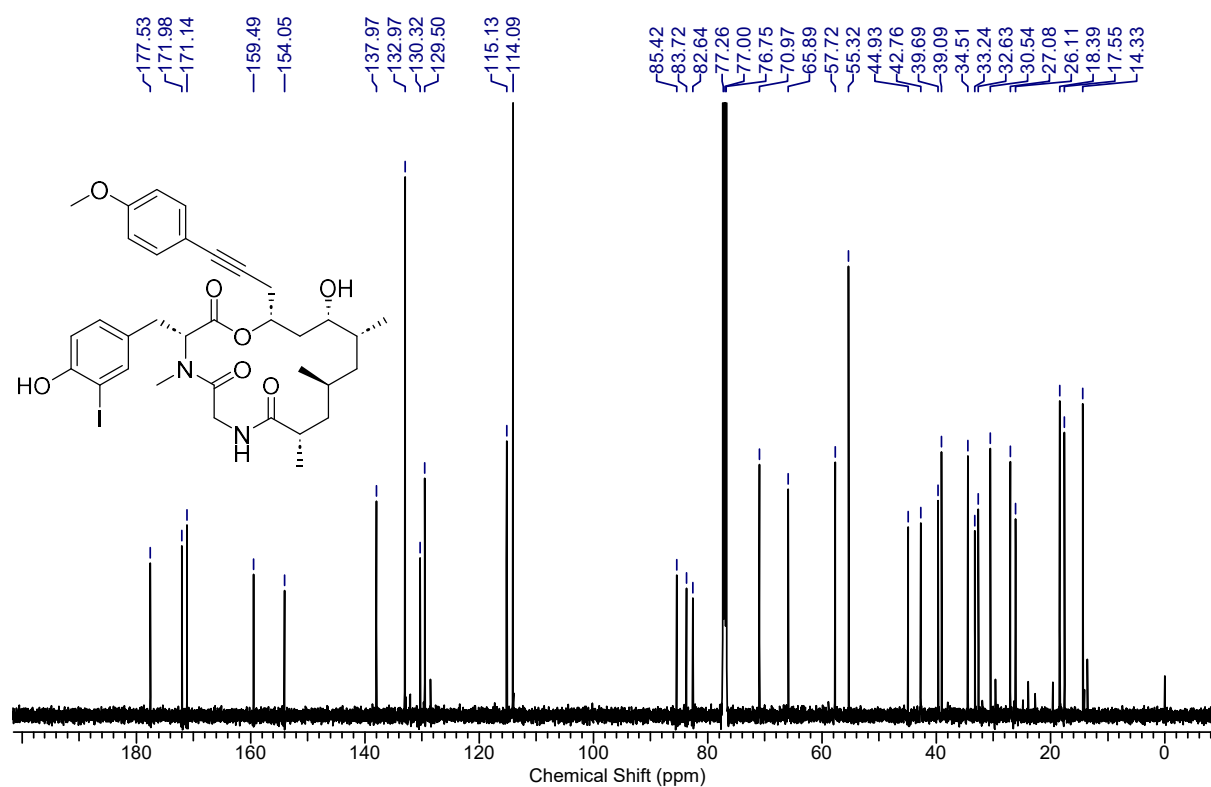

**(3*R*,9*S*,11*S*,13*R*,14*S*,16*R*)-14-Hydroxy-3-(4-hydroxy-3-iodobenzyl)-4,9,11,13-tetramethyl-16-[3-(4-nitrophenyl)prop-2-yn-1-yl]-1-oxa-4,7-diazacyclohexadecane-2,5,8-trione (10c)**

<sup>1</sup>H-NMR (500 MHz, CDCl<sub>3</sub>)

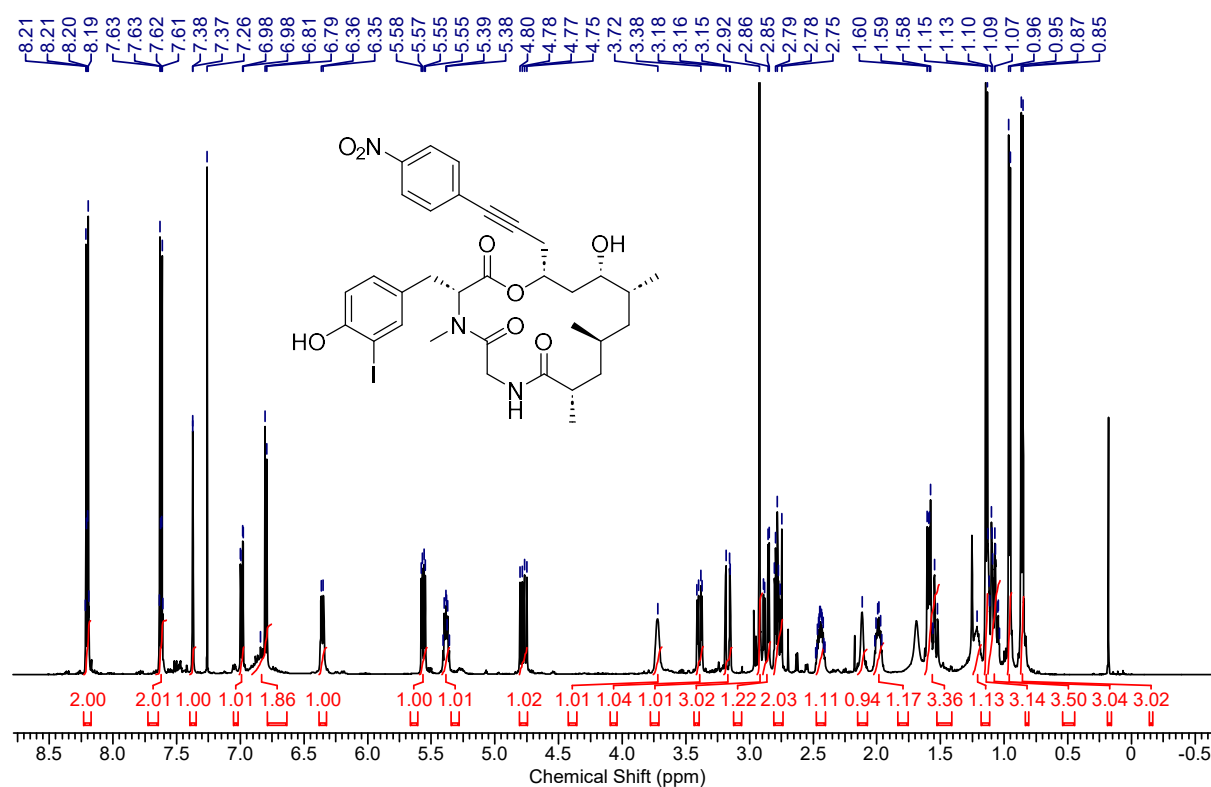

<sup>13</sup>C-NMR (500 MHz, CDCl<sub>3</sub>)

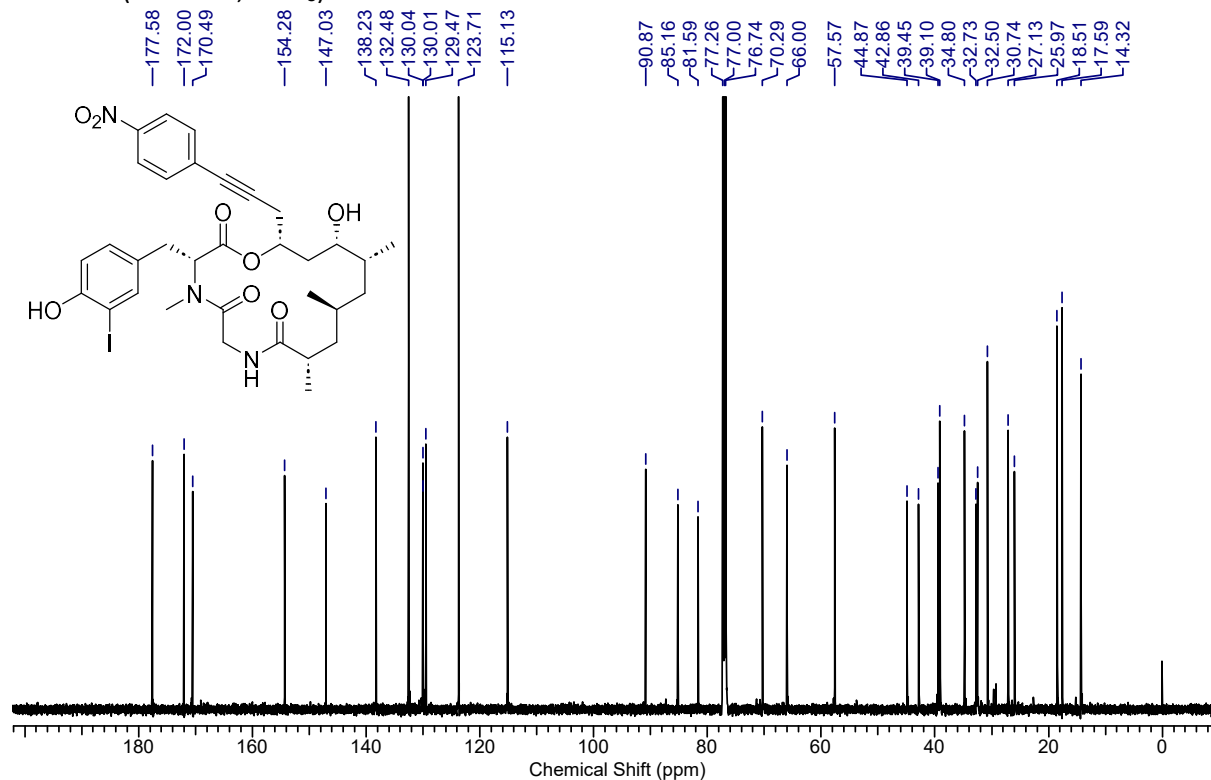

**(3*R*,9*S*,11*S*,13*R*,14*S*,16*R*)-14-Hydroxy-3-(4-hydroxy-3-iodobenzyl)-16-{3-[(2-hydroxyethyl)thio]-propyl}-4,9,11,13-tetramethyl-1-oxa-4,7-diazacyclohexadecane-2,5,8-trione (11a)**

<sup>1</sup>H-NMR (500 MHz, CDCl<sub>3</sub>)

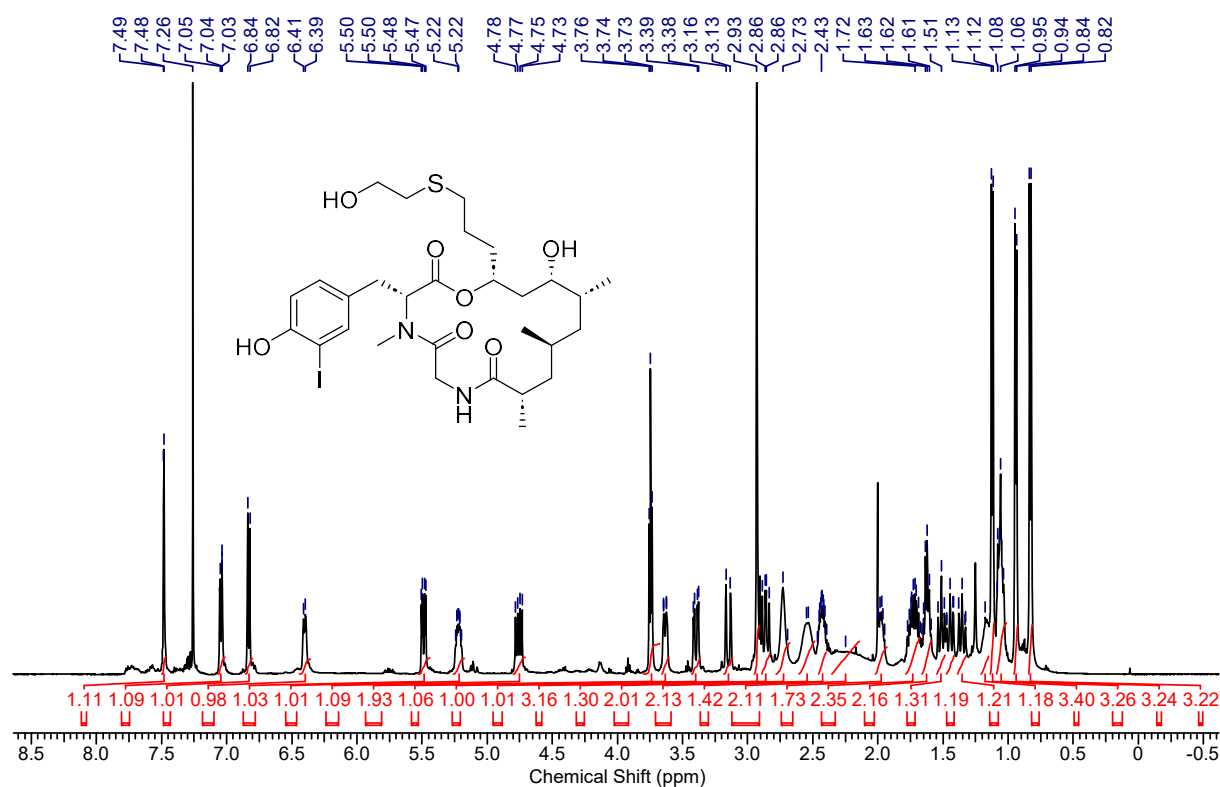

<sup>13</sup>C-NMR (125 MHz, CDCl<sub>3</sub>)

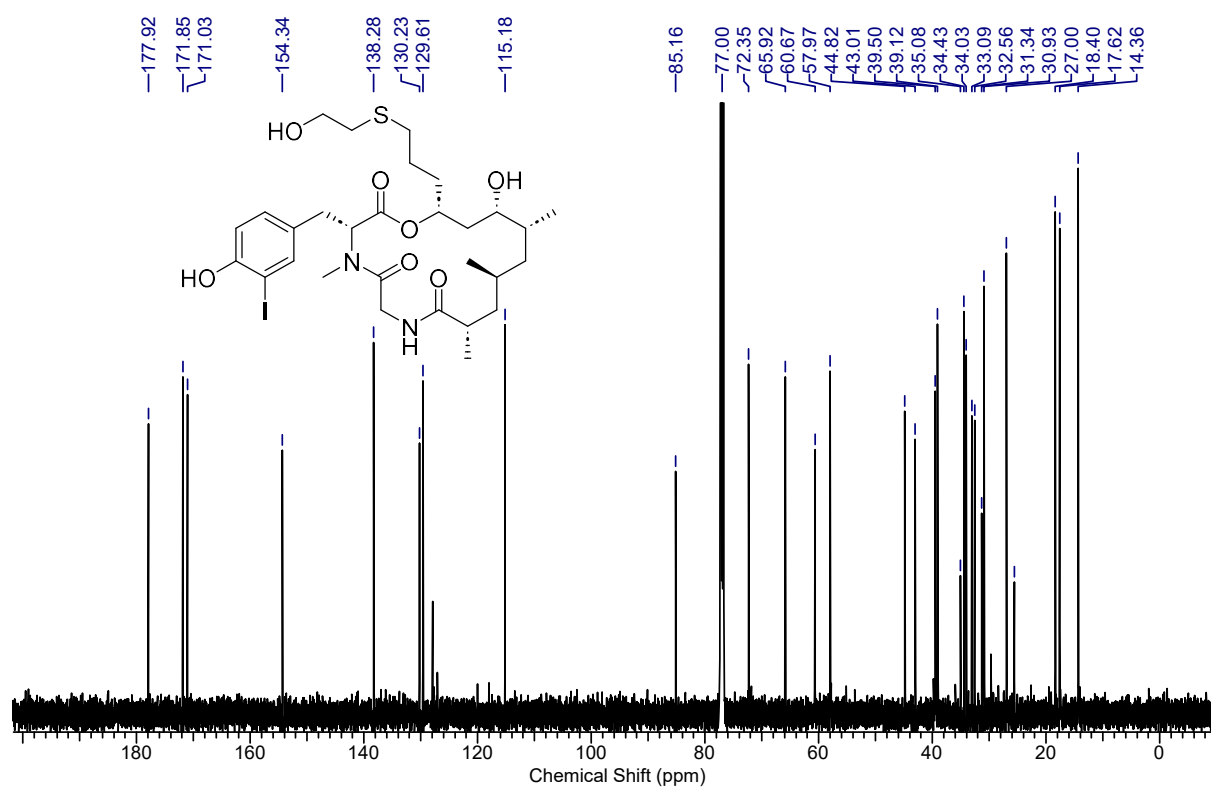

**(3*R*,9*S*,11*S*,13*R*,14*S*,16*R*)-14-Hydroxy-3-(4-hydroxy-3-iodobenzyl)-4,9,11,13-tetramethyl-16-[3-(pentylthio)propyl]-1-oxa-4,7-diazacyclohexadecane-2,5,8-trione (11b)**

<sup>1</sup>H-NMR (500 MHz, CDCl<sub>3</sub>)

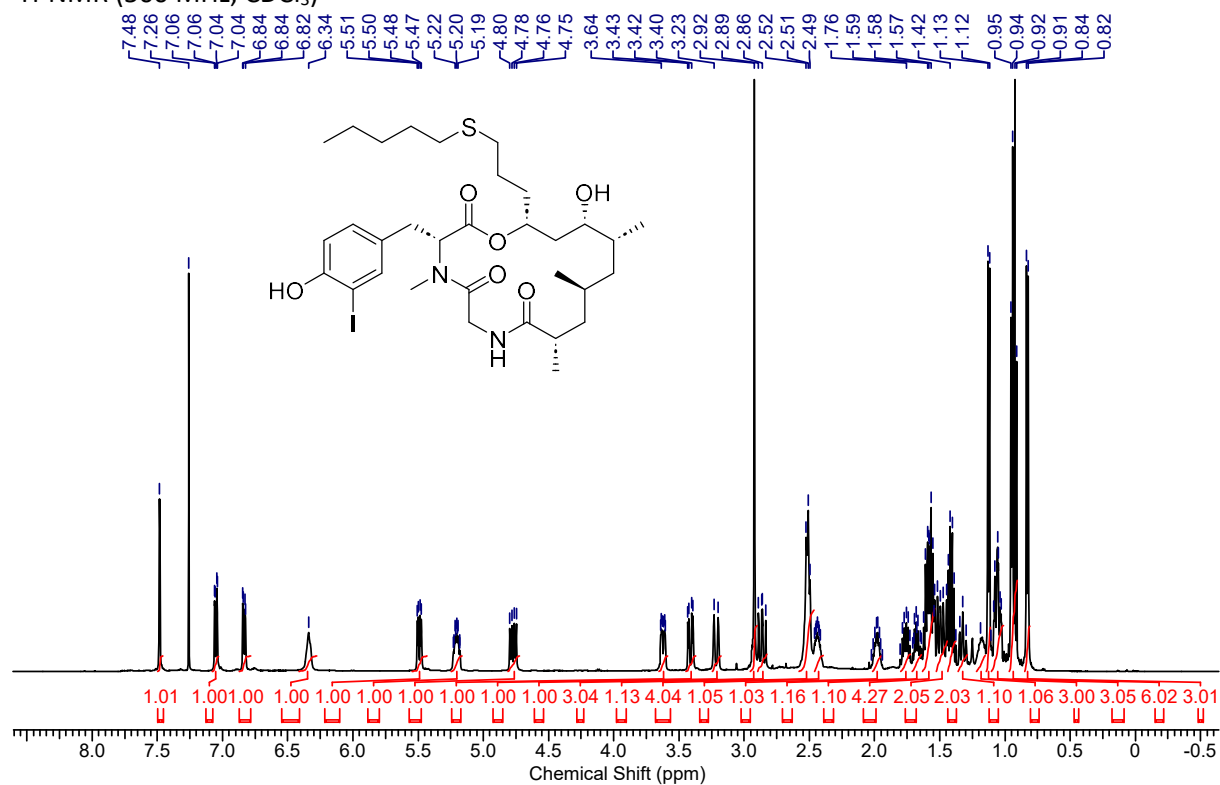

<sup>13</sup>C-NMR (125 MHz, CDCl<sub>3</sub>)

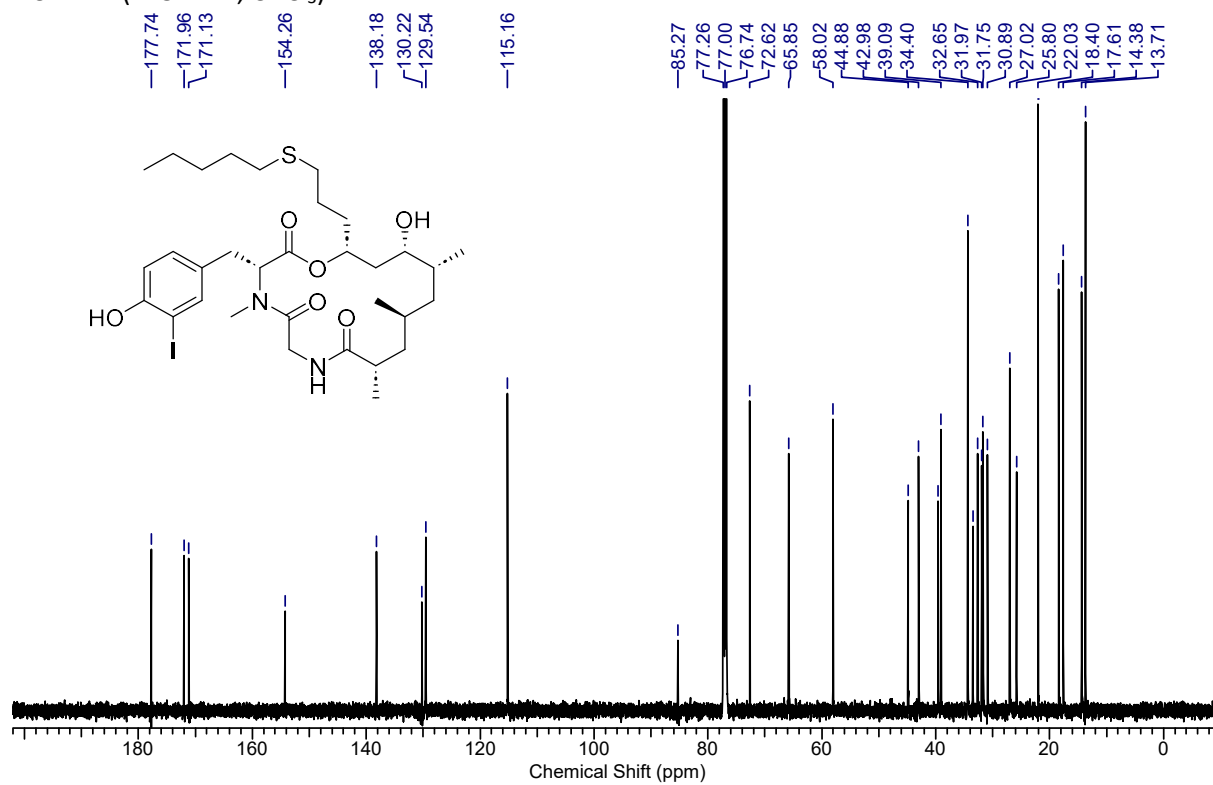



**(3*R*,9*S*,11*S*,13*R*,14*S*,16*R*)-16-[3-(Benzylthio)propyl]-14-hydroxy-3-(4-hydroxy-3-iodobenzyl)-4,9,11,13-tetramethyl-1-oxa-4,7-diazacyclohexadecane-2,5,8-trione (11c)**

<sup>1</sup>H-NMR (500 MHz, CDCl<sub>3</sub>)

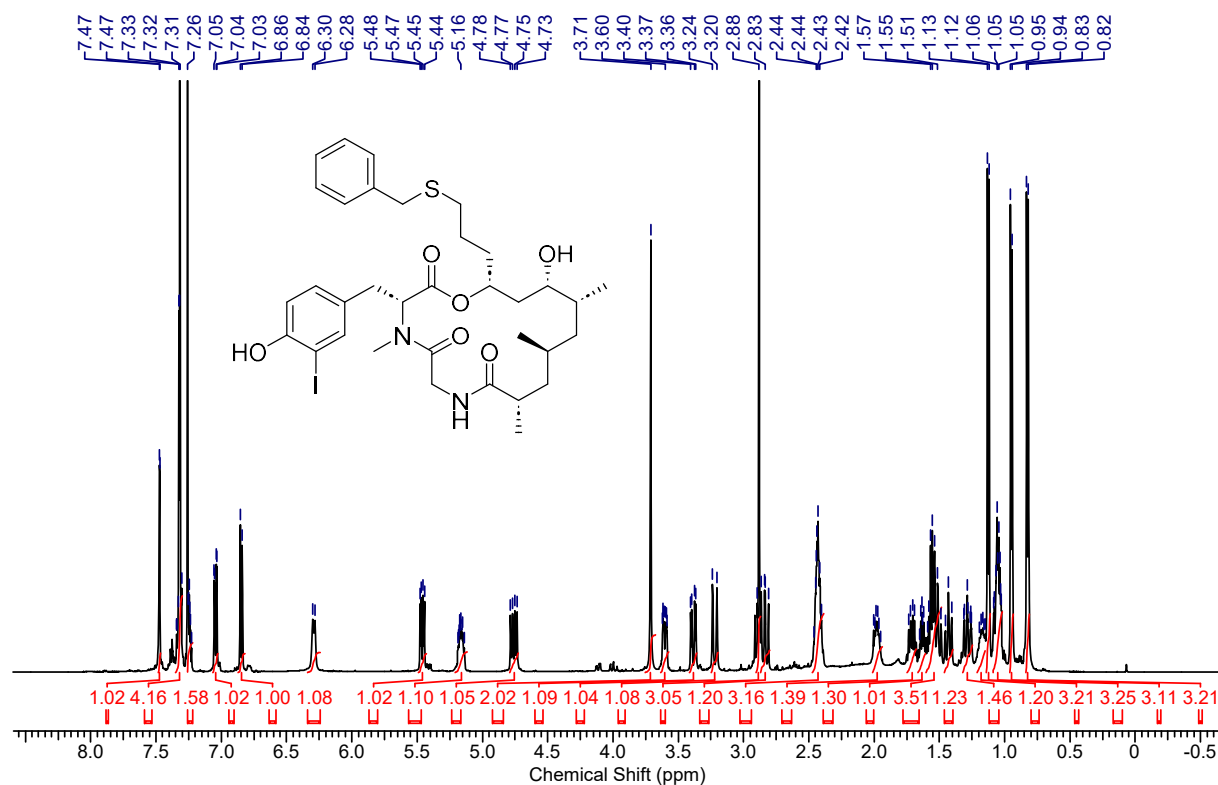

<sup>13</sup>C-NMR (125 MHz, CDCl<sub>3</sub>)

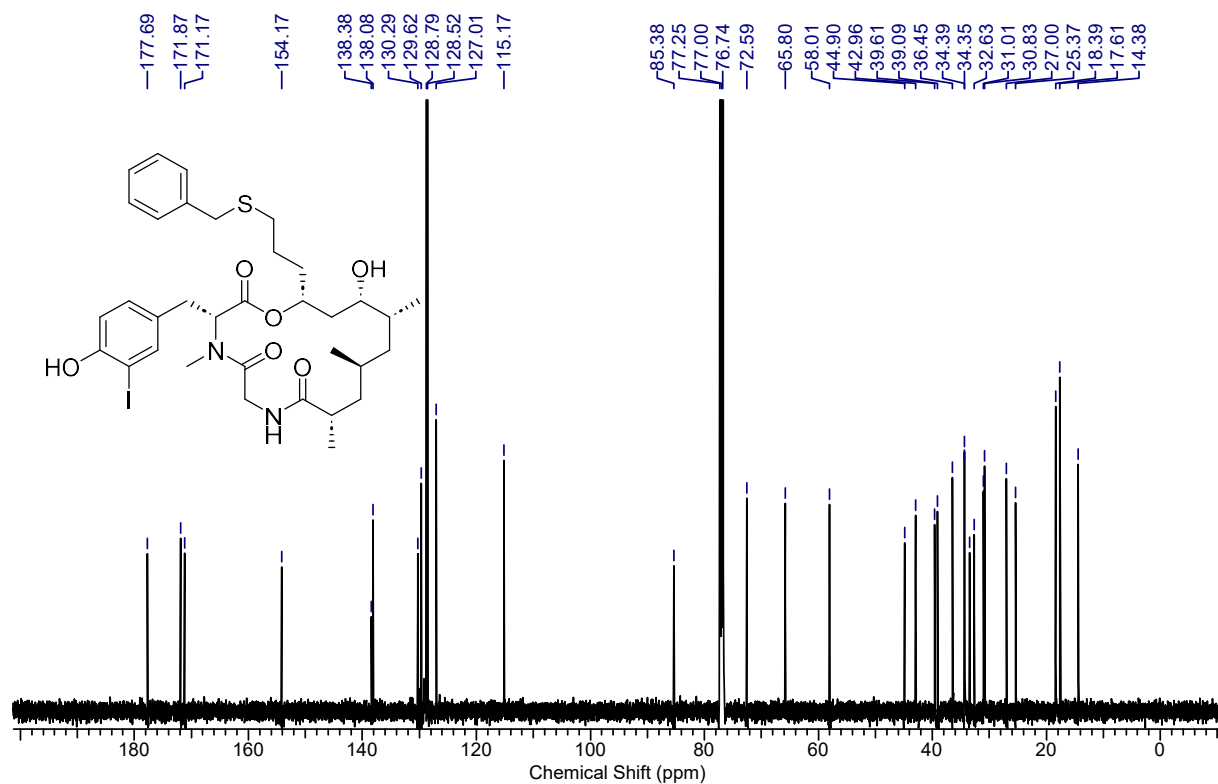

**Ethyl 3-({3-[(*3R,9S,11S,13R,14S,16R*)-14-hydroxy-3-(4-hydroxy-3-iodobenzyl)-4,9,11,13-tetramethyl-2,5,8-trioxo-1-oxa-4,7-diazacyclohexadecan-16-yl]propyl}thio)propanoate (11d)**

<sup>1</sup>H-NMR (500 MHz, CDCl<sub>3</sub>)

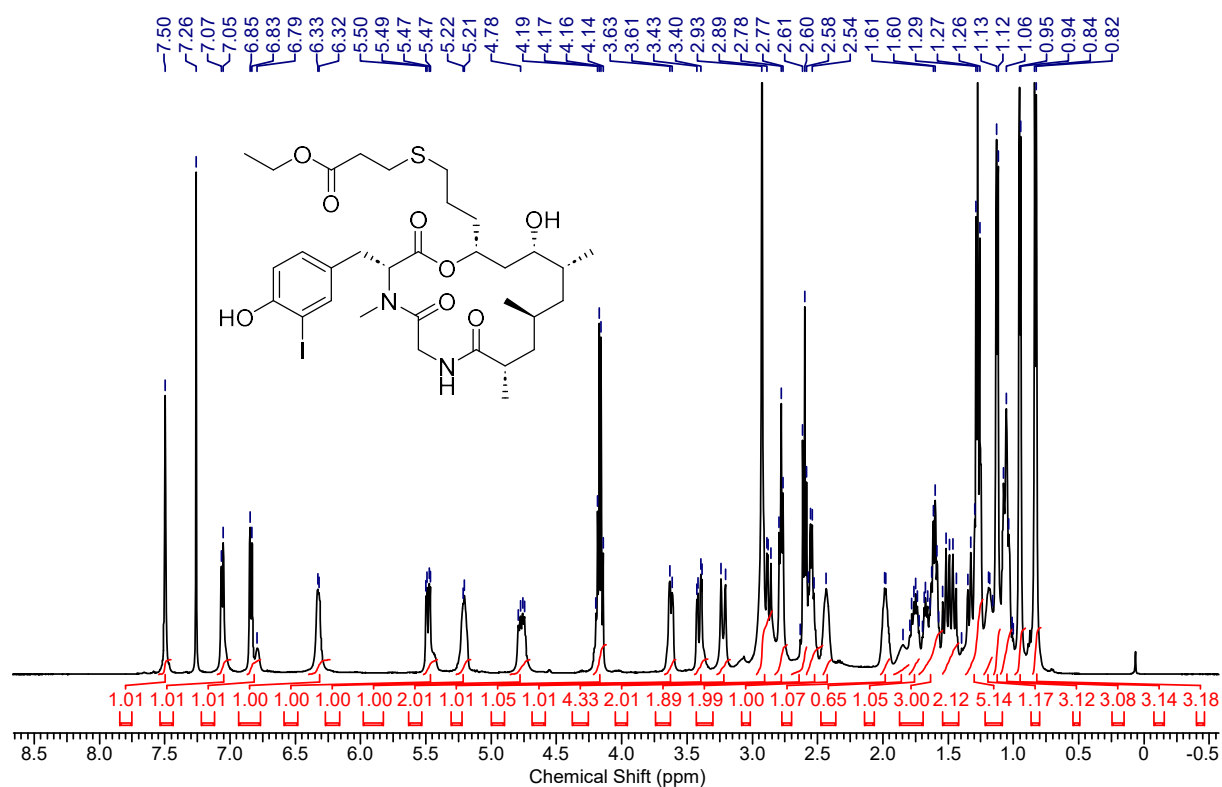

<sup>13</sup>C-NMR (125 MHz, CDCl<sub>3</sub>)

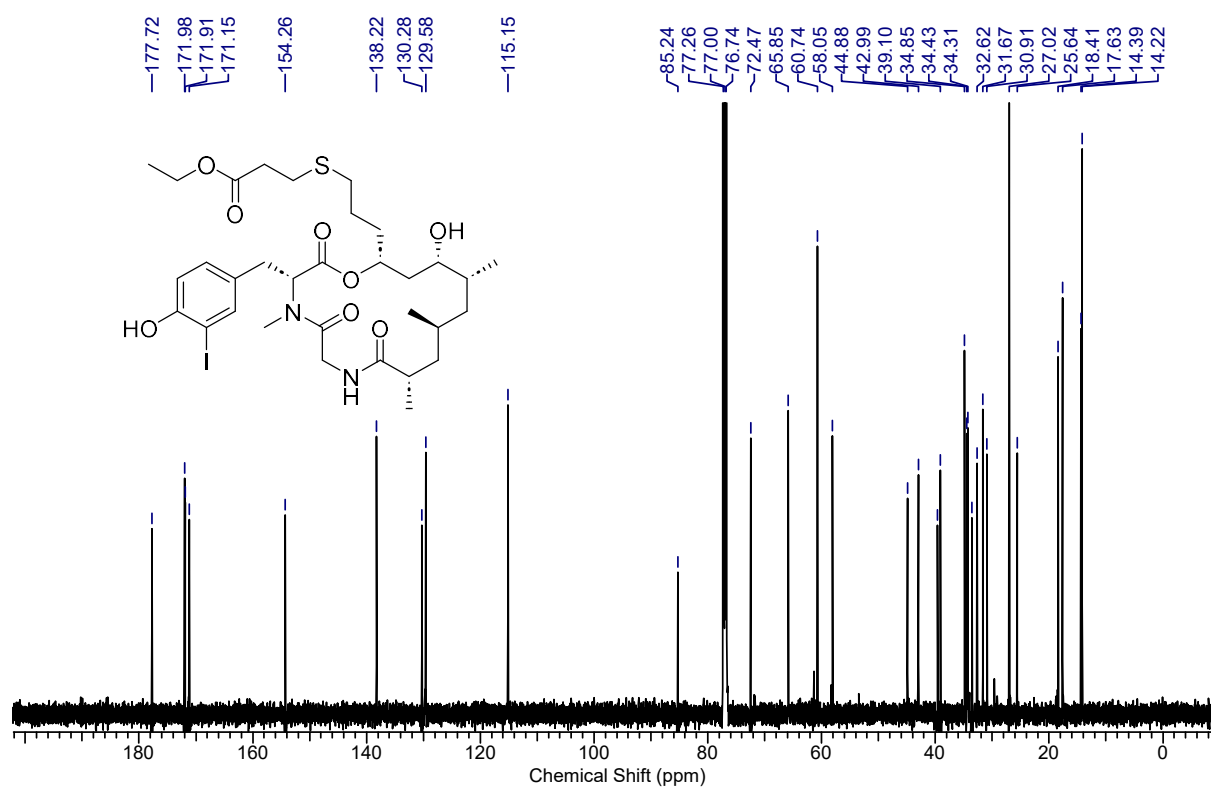

**2-({3-[(3*R*,9*S*,11*S*,13*R*,14*S*,16*R*)-14-Hydroxy-3-(4-hydroxy-3-iodobenzyl)-4,9,11,13-tetramethyl-2,5,8-trioxo-1-oxa-4,7-diazacyclohexadecan-16-yl]propyl}thio)acetic acid (11e)**

<sup>1</sup>H-NMR (500 MHz, CDCl<sub>3</sub>)

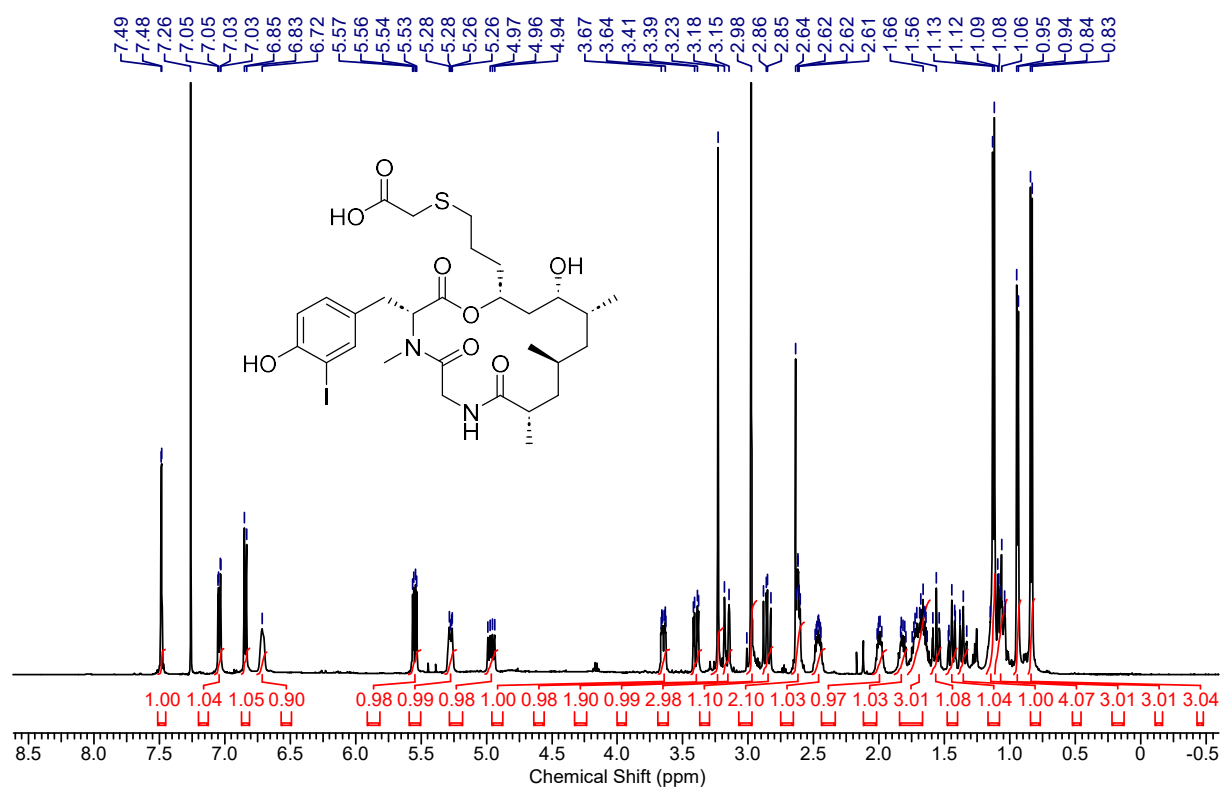

<sup>13</sup>C-NMR (125 MHz, CDCl<sub>3</sub>)

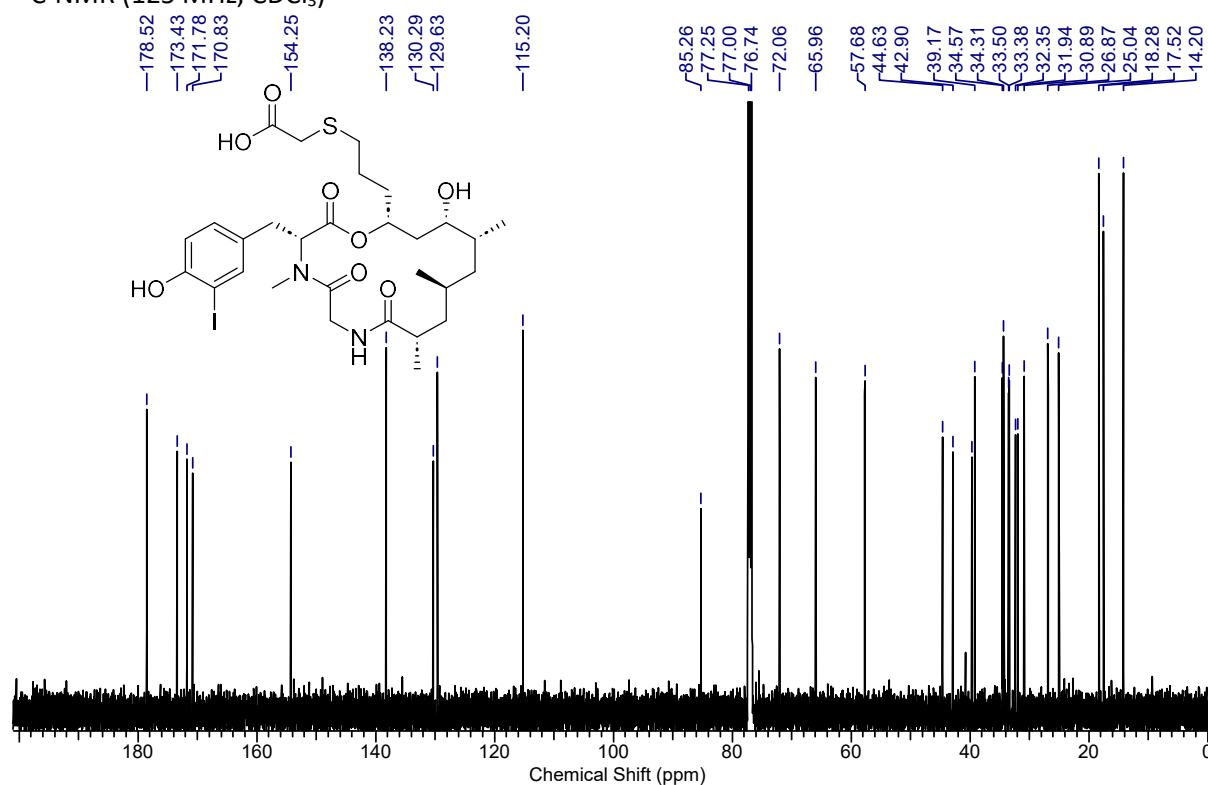

**S-{3-[(3*R*,9*S*,11*S*,13*R*,14*S*,16*R*)-14-Hydroxy-3-(4-hydroxy-3-iodobenzyl)-4,9,11,13-tetramethyl-2,5,8-trioxo-1-oxa-4,7-diazacyclohexadecan-16-yl]propyl} ethanethioate (11f)**

<sup>1</sup>H-NMR (500 MHz, CDCl<sub>3</sub>)

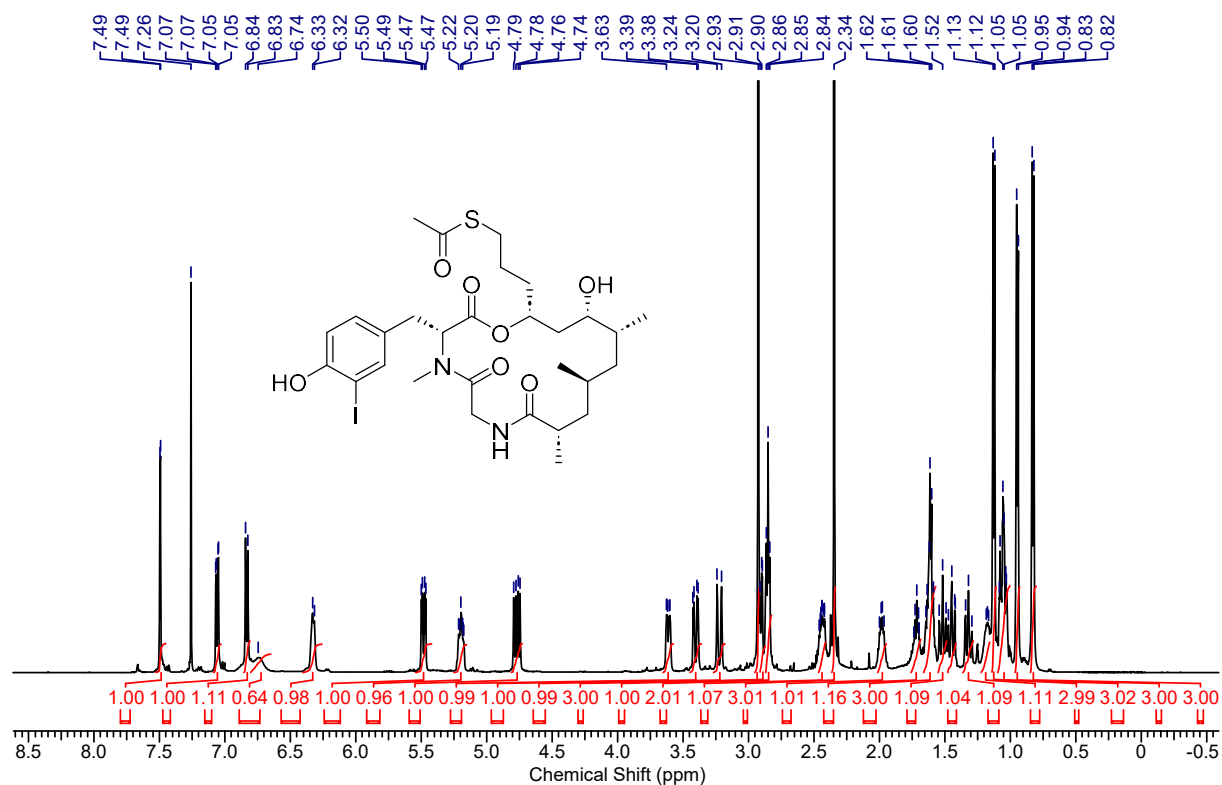

<sup>13</sup>C-NMR (125 MHz, CDCl<sub>3</sub>)

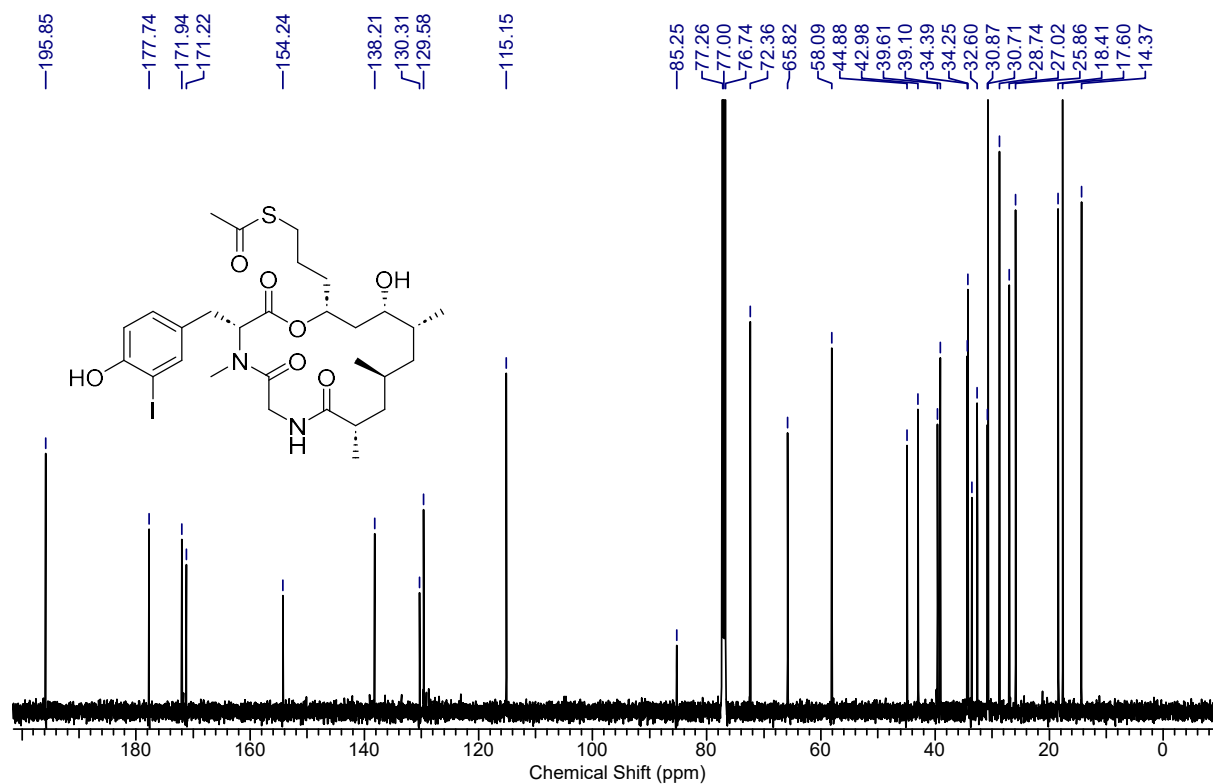

Supplement: s1 [file s1]
